# Supplementary material for: Human Follicular Mites: Ectoparasites Becoming Symbionts
Source: Oxford University Press journal article supplement (doi:10.1093/molbev/msac125), 2022-06-01
Supplement: msac125_supplementary_data.pdf [file msac125_supplementary_data.pdf]

## Supplementary Information

# Human follicular mites: Ectoparasites become symbionts

Gilbert Smith, Alejandro Manzano Marín, Mariana Reyes-Prieto, Cátia Sofia Ribeiro Antunes, Obed Nanjul Goselle, Victoria Ashworth, Abdulhalem Abdulsamad A. Jan, Andrés Moya, Amparo Latorre, M. Alejandra Perotti, Henk R Braig

### Contents

|            |                                                                                                                |    |
|------------|----------------------------------------------------------------------------------------------------------------|----|
| 1          | Supplementary Figures and Table                                                                                | 3  |
| Fig. S1    | Demodex is maternally inherited                                                                                | 3  |
| Fig. S2    | Functions of rapidly evolving gene families of Demodex and Acariformes                                         | 4  |
| Fig. S3    | Mitochondrial genome has polycistrons                                                                          | 5  |
| Fig. S4    | Distribution of the RELAX parameter K across significant selection tests                                       | 6  |
| Fig. S5    | Host association determines extend of AT-bias of invertebrate and vertebrate animals                           | 7  |
| Tab. S1    | Intergenic distances and introns                                                                               | 8  |
| Fig. S6    | Endopolyploidy in Demodex                                                                                      | 9  |
| 2          | Supplementary Items (SI)                                                                                       | 10 |
| Fig. SI 1  | Benchmarking Universal Single Copy Orthologs                                                                   | 10 |
| Fig. SI 2  | Length distribution of proteins in parasitic/endosymbiotic Demodex and free-living/plant-parasitic Tetranychus | 11 |
| Tab. SI 1  | Probably pseudogenes of Demodex arranged according to Demodex AA length                                        | 12 |
| Tab. SI 2  | Orthogroups of Demodex rapidly expanding                                                                       | 14 |
| Tab. SI 3  | Minimal genome sizes and number of coding genes per taxonomic clade in the Pan-Arthropoda                      | 15 |
| Tab. SI 4  | Species used in genome analysis                                                                                | 18 |
| Tab. SI 5  | Repeat content of mite genomes                                                                                 | 20 |
| Tab. SI 6  | Intergenic distances and introns                                                                               | 21 |
| Fig. SI 3  | Host association determines extend of AT-bias of Acariformes                                                   | 23 |
| Fig. SI 4  | Genome-wide codon usage bias in Acariformes                                                                    | 25 |
| Fig. SI 5  | Mutation spectrum for Demodex demonstrates an AT-mutational bias                                               | 27 |
| Tab. SI 7  | Orthogroups (OGs) of arthropod species                                                                         | 28 |
| Tab. SI 8  | Computational analysis of gene family evolution model parameters                                               | 30 |
| Fig. SI 6  | Computational Analysis of Gene Family Evolution Ihtest histogram                                               | 32 |
| Fig. SI 7  | Alternative IQtree topologies                                                                                  | 33 |
| Tab. SI 9  | Gene families showing rapid contraction in Demodex                                                             | 34 |
| Tab. SI 10 | Gene families showing rapid contraction in the Acariformes                                                     | 38 |
| Tab. SI 11 | Gene families showing rapid expansion in the Acariformes                                                       | 42 |

|            |                                                      |    |
|------------|------------------------------------------------------|----|
| Tab. SI 12 | Gene family loss in Demodex                          | 46 |
| Tab. SI 13 | Gene family loss in the Acariformes                  | 50 |
| Tab. SI 14 | RELAX test significant orthogroups                   | 54 |
| Tab. SI 15 | Relaxed selection enrichment                         | 58 |
| Tab. SI 16 | Intensified selection enrichment                     | 62 |
| Tab. SI 17 | Counting of nuclei in <i>Drosophila melanogaster</i> | 66 |
| Tab. SI 18 | Histidine pathway genes                              | 67 |
|            | References                                           | 68 |

# 1 Supplementary Figures and Table

Demodex is maternally inherited

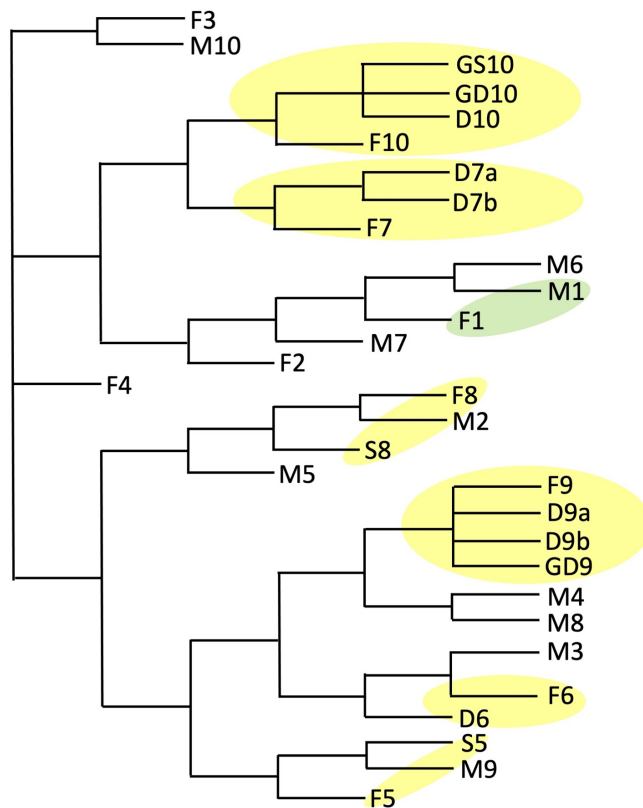

**Figure S1.** Demodex is predominantly maternally inherited. Cladogram of partial mtDNA of *D. folliculorum*. Six maternal relationships highlighted in yellow. Relationships: F: female, M: male, D: daughter, S: son, GD: granddaughter, GS: grandson; female and male couples: F1, M1: female 1 with male 1, GD9a is the daughter of D9a who is the daughter of F9. For horizontal transmission, it is expected that couples carry similar lineages of mites. Female and male couples do not carry similar mite lineages with the exception of F1 (green background). For vertical transmission, it is expected that offspring clusters with maternal lineage (yellow background). Without exception, this is the case for all six families analysed. F10 (mother) clusters daughter D10 and granddaughter GD10 and grandson GS10. F7 (mother) clusters with her two daughters D7a and D7b. F8 (mother) clusters with her son S8 as is the case for F5 (mother) and son S5; mother F6 (mother) and her daughter D6; and F9 (mother) and her two daughters D9a and D9b and her granddaughter D9.

# Functions of rapidly evolving gene families in Demodex and Acariformes

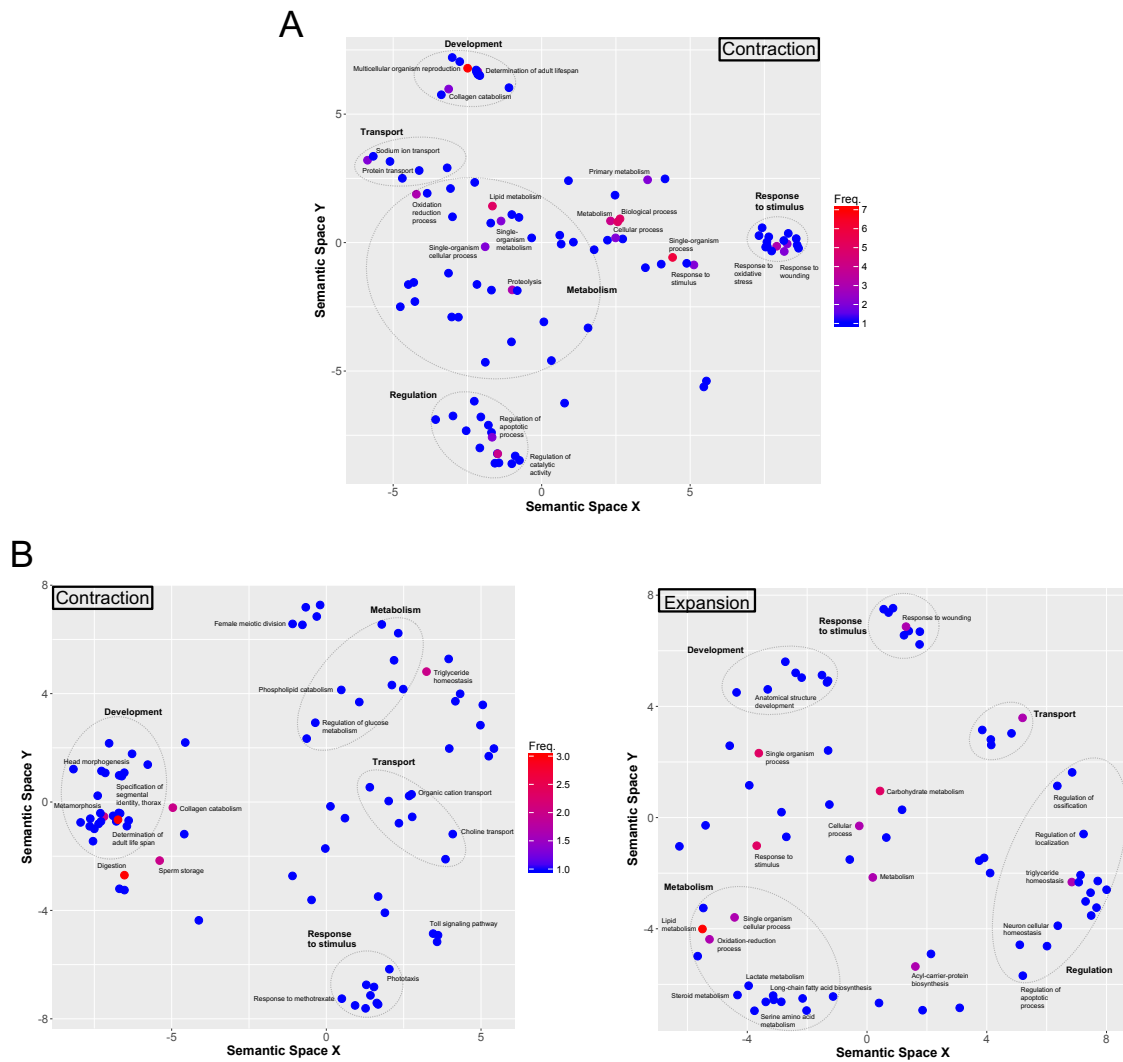

**Figure S2.** Functions of rapidly evolving gene families. **A** Contracting gene families in Demodex. **B** Contracting gene families Acariformes. **C** Expanding gene families in Acariformes. Eight cryptic orthogroups expanding in Demodex are listed Tab. SI 2.

## Mitochondrial genome has polycistrons

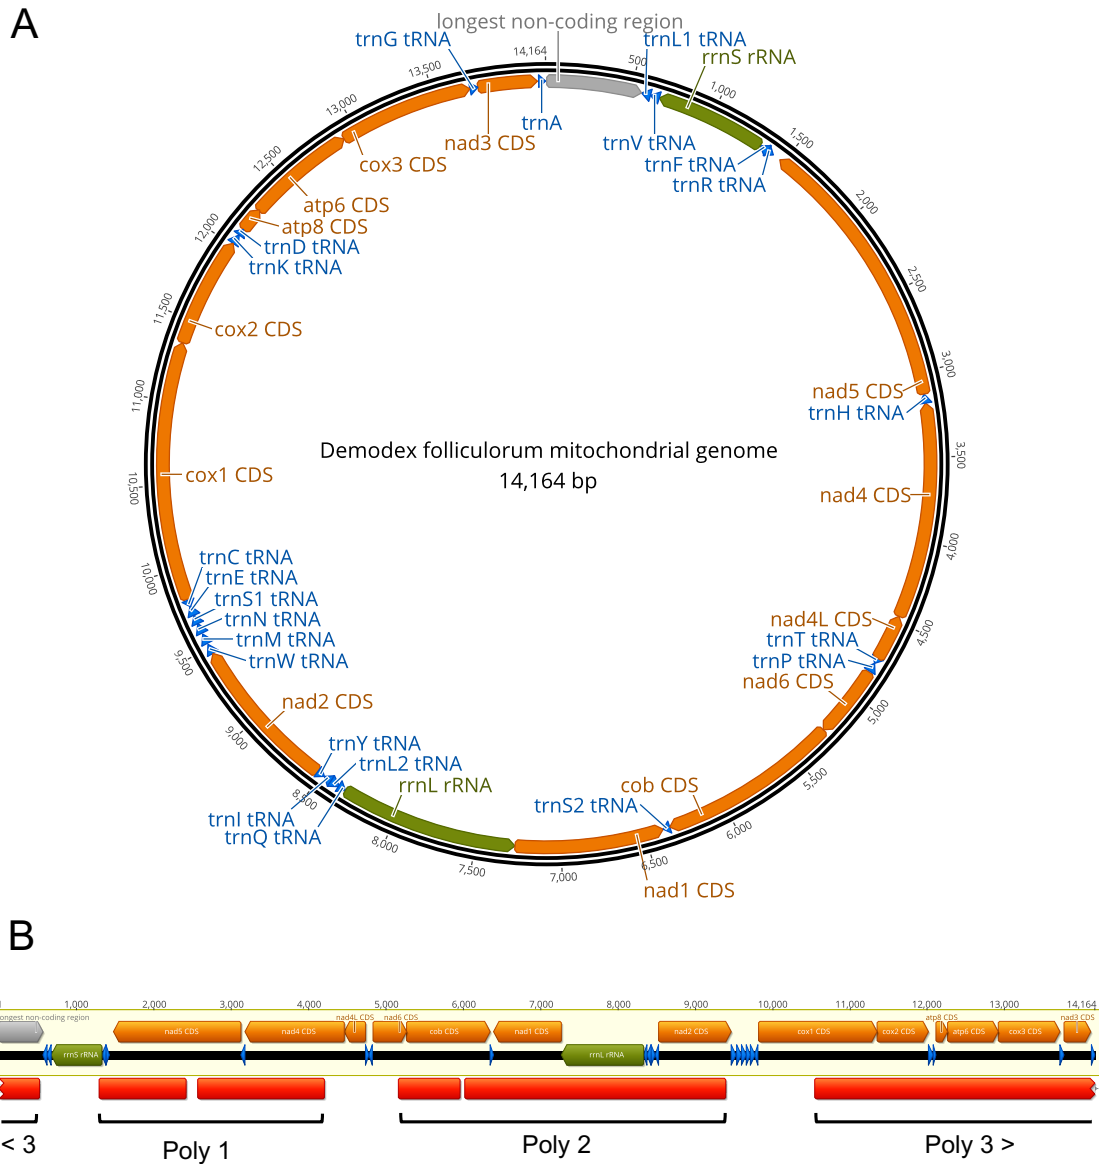

**Figure S3.** Polycistrons in the mitochondrial genome of the human follicle mite, *D. folliculorum*. **A:** Mitochondrial genome annotated with protein coding (orange) and non-coding (green) genes. **B:** Linear view of the mitochondrial genome with transcript-based evidence for polycistronic expression (red: labelled “Poly” for each polycistronic unit). Transcripts were assembled from RNA-sequencing data and mapped to the mitochondrial reference.

## Distribution of the RELAX parameter K across significant selection tests

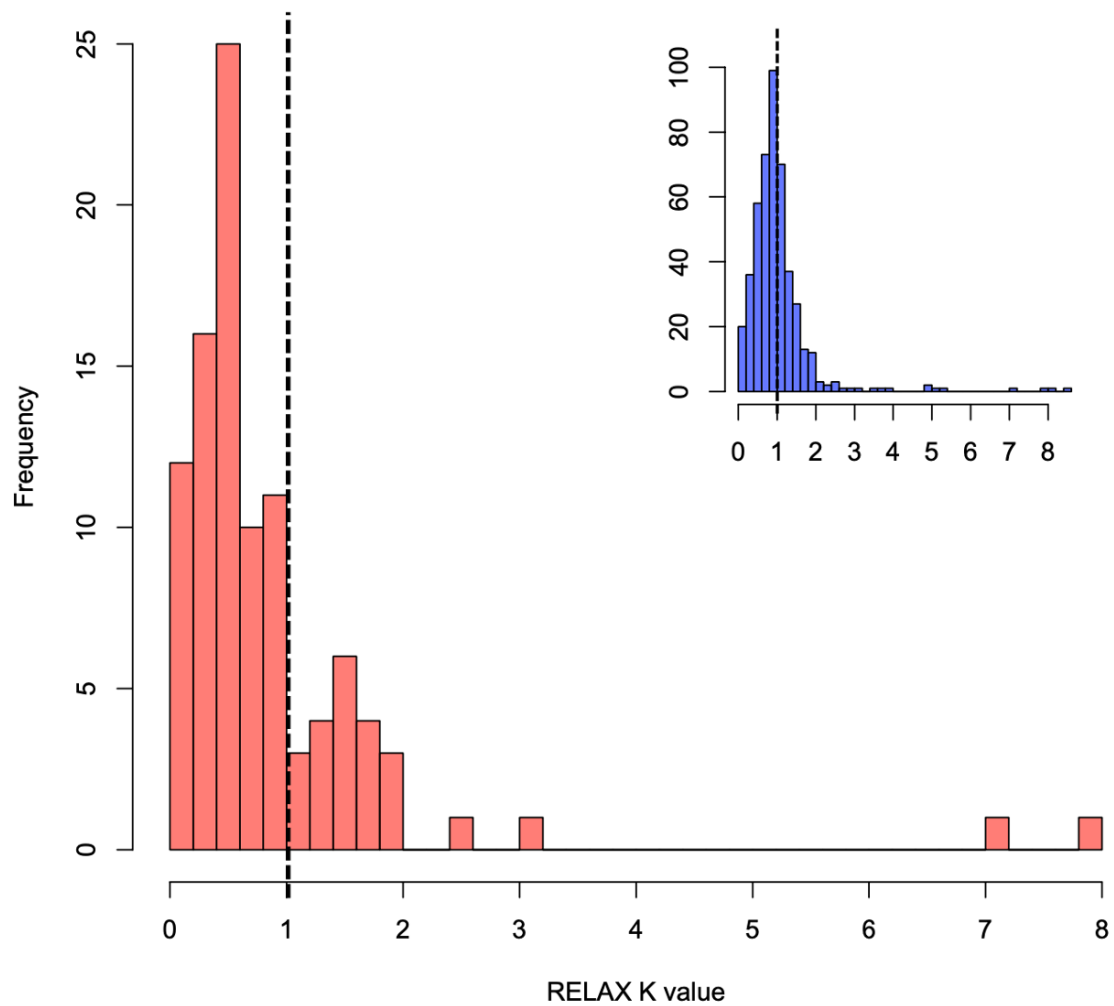

**Figure S4.** Relaxed selection is more common than intensified (purifying) selection in Acariformes compared to spiders and scorpions. Distribution of the RELAX parameter K across significant selection tests (adjusted  $p < 0.1$ ; red bars), and all tests (blue bars, inset). The density plot of omega values (non-synonymous/synonymous substitutions:  $dN/dS$ ) for genes showing relaxation of selection ( $K < 1$ ; main) and intensified selection ( $K > 1$ ; inset) in Acariformes and Functions of genes under relaxed selection in Acariformes are depicted in Fig. 2 of the main paper.

## Host association determines extend of AT-bias of invertebrate and vertebrate animals

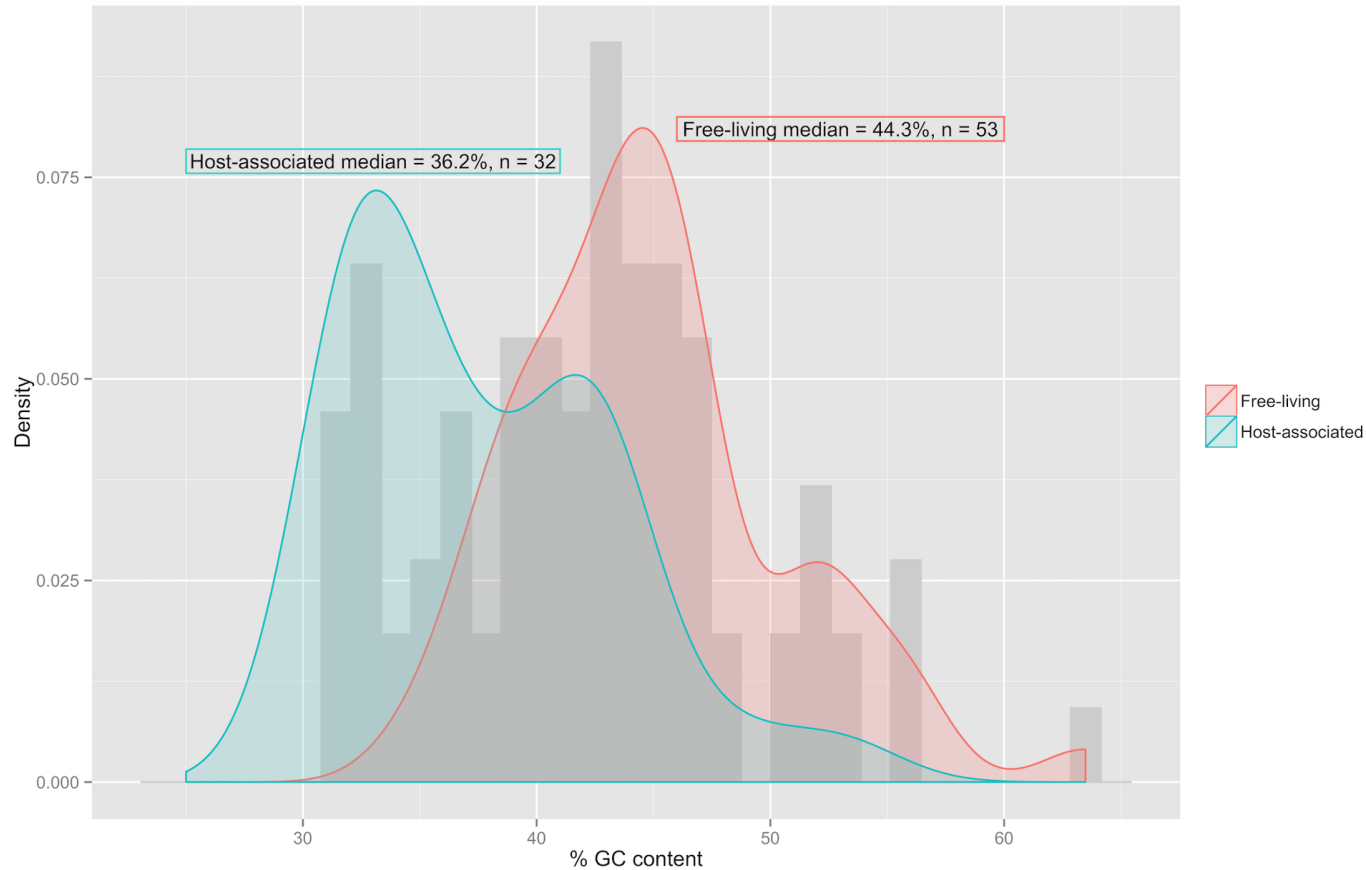

**Fig. S5. A** Host association determines the extend of AT-bias in 85 species of invertebrates and vertebrate animals based on the *Srp54K* gene, green host-associated, red free-living. **B.** Same analysis detailed for acariformes. **C.** Genome-wide codon usage bias seen in acariformes is more likely due to mutational bias leading to a higher frequency of codons containing adenine or thymine in the second and/or third position. ENCprime was used to calculate NC, the number of effective codons across coding sequence sets, as well as Ncp (Nc prime or Nc'), a measure of codon use corrected by the background mutation pattern. Corrections were performed using the nucleotide frequency of the third codon position for each respective gene under study. **D.** Mutation spectrum for *Demodex* demonstrates an AT-mutational bias. Frequency is for all mutation types discovered in RNA-sequencing data.

Intergenic distances and introns

| Species*                           | Acari                       |                            |                            |                                 |                          | Araneae                  |                                 | Insecta                          |                                           |
|------------------------------------|-----------------------------|----------------------------|----------------------------|---------------------------------|--------------------------|--------------------------|---------------------------------|----------------------------------|-------------------------------------------|
|                                    | <i>Demodex folliculorum</i> | <i>Aculops lycopersici</i> | <i>Tetranychus urticae</i> | <i>Dermatophagoides farinae</i> | <i>Sarcoptes scabiei</i> | <i>Ixodes scapularis</i> | <i>Galendromus occidentalis</i> | <i>Parasteatoda tepidariorum</i> | Diptera<br><i>Drosophila melanogaster</i> |
| mean intron length (bp)            | <b>514</b>                  |                            | 502                        | 693                             | 147                      | 2,920                    | 625                             | 4,324                            | 1,067                                     |
| median intron length (bp)          | <b>79</b>                   | 170                        | 94                         | 95                              | 69                       | 1,602                    | 133                             | 1,850                            | 69                                        |
| mean intron count per gene         | <b>2.83</b>                 | 0.30                       | 2.35                       | 1.93                            | 2.03                     | 3.33                     | 4.61                            | 6.2                              | 2.94                                      |
| mean exon length (bp)              | <b>383</b>                  |                            | 319                        | 456                             | 367                      | 197                      | 266                             | 198                              | 400                                       |
| median exon length (bp)            | <b>180</b>                  |                            | 156                        | 279                             | 203                      | 143                      | 171                             | 129                              | 215                                       |
| mean distance between CDS (bp) *   | <b>2,429</b>                |                            | 2,630                      | 1,850                           | 1,526                    | 2,6615                   | 8,028                           | 44,743                           | 5,668                                     |
| median distance between CDS (bp) § | <b>1,293</b>                | 538                        | 1,313                      | 630                             | 749                      | 9,236                    | 2,890                           | 14,217                           | 1,197                                     |

\*Data is for coding sequences only and is for one CDS per gene. No filtering on raw numbers has been performed, so annotation quality may play a role in differences.

§ Distance between CDS annotations does not include distance between last CDS and scaffold ends.

**Table S6.** Acariformes have reduced their intergenic and intronic content compared to most arachnids, and a little more than *Drosophila* too. Intron numbers are lower in Acariformes, except for *Demodex*. Intron length is shorter on average in Acariformes as well, even when compared to *Galendromus occidentalis* and *Drosophila*. Intergenic distance is also lower in Acariformes than all else, though *melanogaster* is close. *D. melanogaster* sometimes is close to Acariformes based on median, but not mean, suggesting wider variation in metrics in *D. melanogaster*.



## Endopolyploidy in *D. folliculorum* female

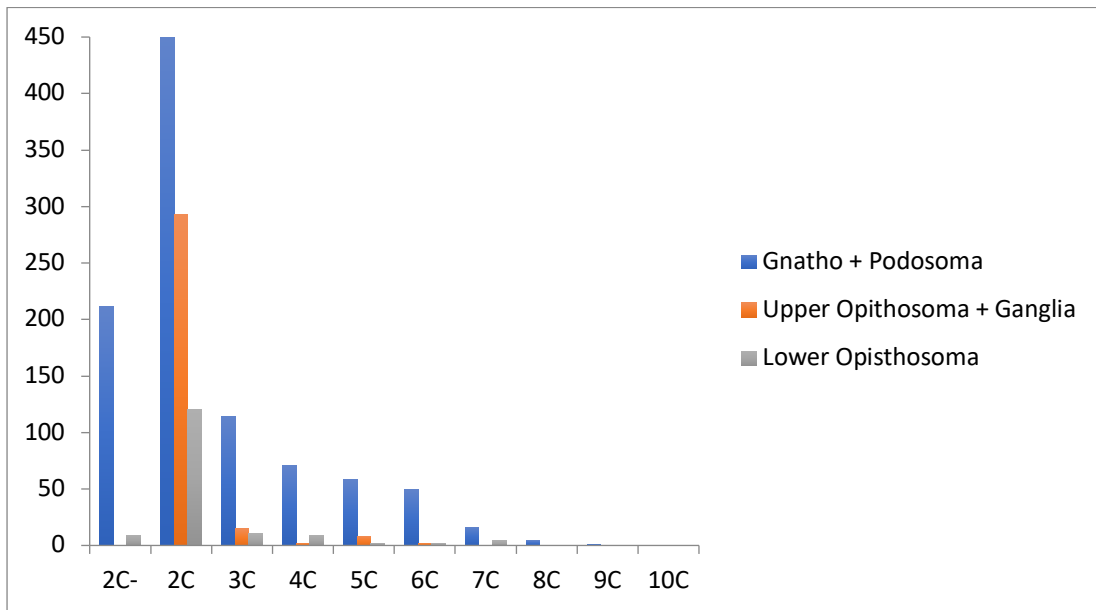

**Figure S7.** Ploidy distribution of nuclei in different body regions of *D. folliculorum* females. Abscissa: ploidy of nuclei, ordinate: number of nuclei per body region. 2C means diploid, 2C- indicates underreplication. The highest level of polyploidy observed was decaploid. The levels of polyploidy deviate from a geometric progression.

2C- presents underreplication where a premature stall takes place with less than one complete cycle of replication, unlike underreplication in nuclei of follicle cells and cells of salivary glands. In *D. folliculorum*, around 20 % of the diploid nuclei (some 222 nuclei) of adult females showed an 11 % deficiency in fluorescent intensity or nuclear content; these nuclei are called diploid *infer*.

The higher ploidy levels of *D. folliculorum* are mostly restricted to the gnathosomal and podosomal regions, with very little in the opisthosoma. These polypliod cells are mainly located in the internal organs as compared to the peripheral nuclei and the integument. Within the gnathosomal and podosomal regions, lower level polypliod nuclei are more prominent in the internal structures of the legs whereas the higher levels of polypliod nuclei such as hexaploid are standing out in the internal organs of the main body of the gnathosoma and podosoma.

## 2 Supplementary Items (SI)

### Benchmarking Universal Single Copy Orthologs

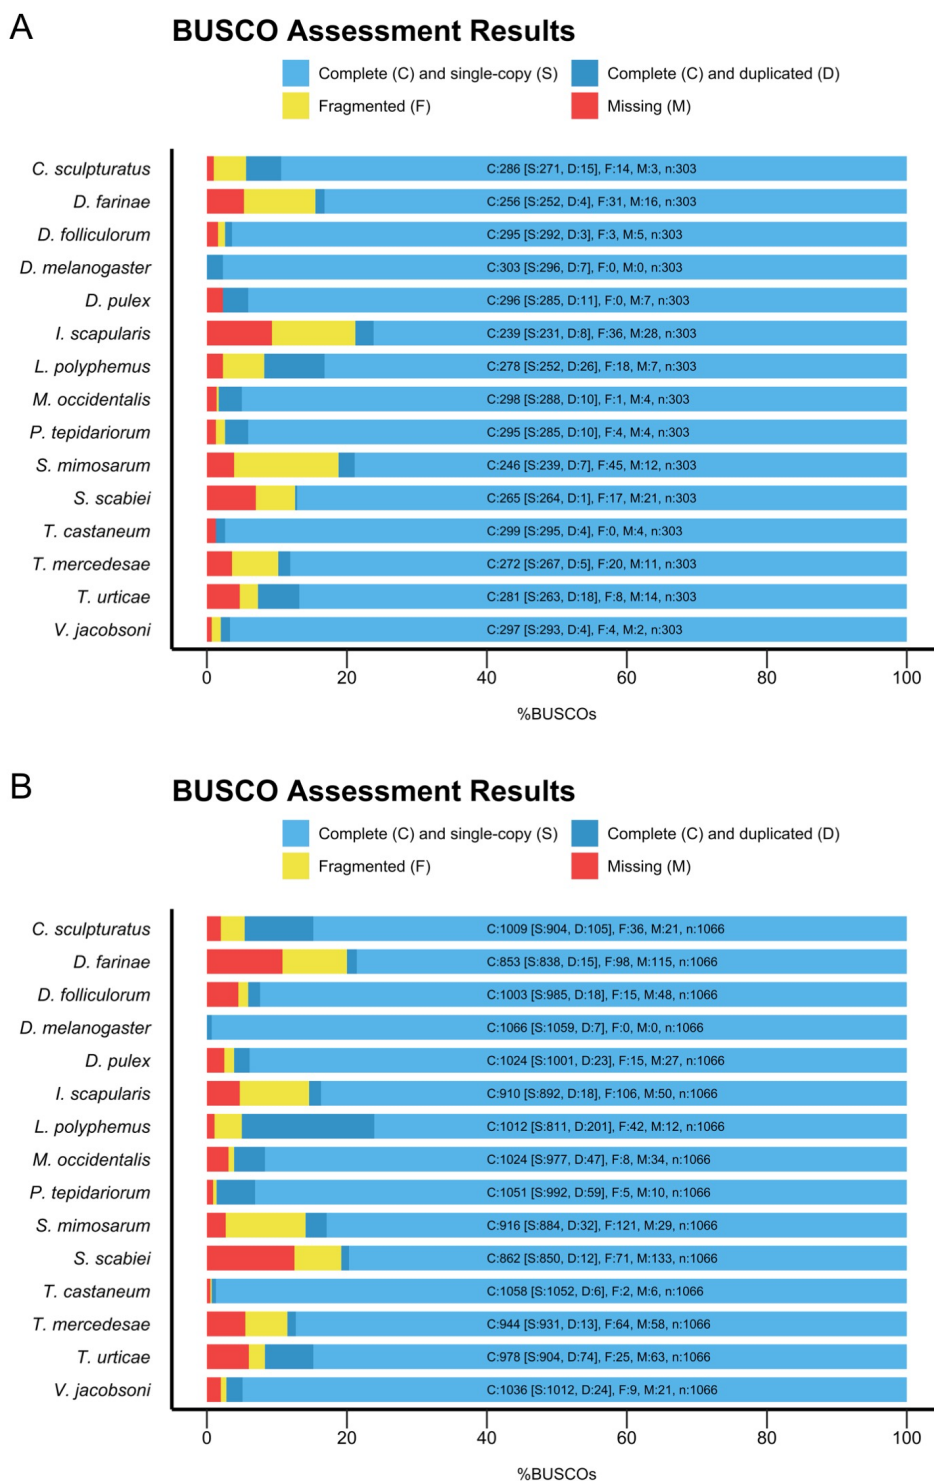

**Figure SI 1.** The *Demodex* genome is quite complete and well annotated. BUSCO results for genomes compared in this study. BUSCO was run for both eukaryote (A) and arthropod (B) sets of single copy orthologs, on released curated protein sets for each genome, filtered for longest isoform per gene where isoforms were annotated.

## Length distribution of proteins in parasitic/endosymbiotic Demodex and free-living/plant-parasitic Tetranychus

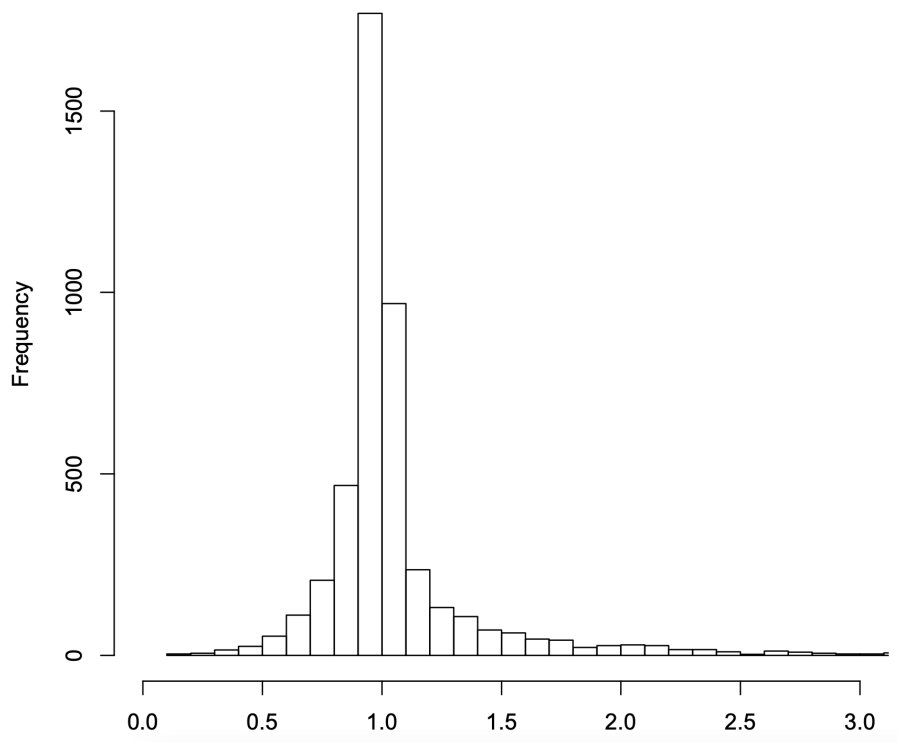

**Figure SI 2.** Zoomed-in length distribution of proteins in parasitic/endosymbiotic Demodex and free-living/plant-parasitic Tetranychus. The amino acid length of 4,582 one-to-one orthologues of Demodex was divided by the amino acid length of Tetranychus. All values on the abscissa below 1 represent proteins that are shorter in Demodex compared to Tetranychus and vice versa. The biggest problem here is that in fact two parasitic species are compared with each other. Sequences of closely related free-living species are still missing.

Assuming in a first approximation that pseudogenes will have lost 50 % or more of their protein length, only 50 Demodex proteins (1.1 %) meet this criterium, whereas 214 Tetranychus proteins (4.7 %) would qualify as pseudogenes.

The Asian long-horn beetle, *Anoplophora glabripennis*, has a large genome with 22,253 protein-coding genes and 66 pseudogenes, which represent 0.3 % (McKenna et al. 2016; Li et al. 2019).

Table SI 1

Probably pseudogenes of Demodex arranged according to Demodex AA length

| ID              | Dem. AA | Tet. AA | Function                                                          |
|-----------------|---------|---------|-------------------------------------------------------------------|
| DMDXFOLL_001444 | 110     | 988     | ataxin-2 homolog                                                  |
| DMDXFOLL_008670 | 253     | 1,456   | matricellular osteonectin sparc bm-40                             |
| DMDXFOLL_000412 | 134     | 735     | glycerol-3-phosphate mitochondrial                                |
| DMDXFOLL_006536 | 72      | 361     | large proline-rich BAG6                                           |
| DMDXFOLL_002943 | 285     | 1,301   | endothelial PAS domain-containing 1-like                          |
| DMDXFOLL_001752 | 208     | 912     | WD repeat-containing 43-like                                      |
| DMDXFOLL_003669 | 244     | 1,029   | mediator of RNA polymerase II transcription subunit 8 isoform X2  |
| DMDXFOLL_009322 | 121     | 497     | GTP-binding RAD-like                                              |
| DMDXFOLL_005420 | 559     | 2,239   | multiple PDZ domain                                               |
| DMDXFOLL_006675 | 391     | 1,469   | arrestin domain-containing 3-like                                 |
| DMDXFOLL_005513 | 147     | 475     | spaetzle 4                                                        |
| DMDXFOLL_005099 | 125     | 395     | steroid receptor seven- isoforms b c                              |
| DMDXFOLL_002884 | 203     | 616     | 5-hydroxytryptamine receptor 2A isoform X1                        |
| DMDXFOLL_006689 | 124     | 365     | thromboxane-A synthase-like                                       |
| DMDXFOLL_001855 | 149     | 438     | targeting for Xklp2-B-like                                        |
| DMDXFOLL_008375 | 146     | 429     | tachykinin-like peptides receptor 99D                             |
| DMDXFOLL_006396 | 248     | 723     | ataxin-3-like isoform X2                                          |
| DMDXFOLL_005292 | 407     | 1,145   | TBC1 domain family member 1 isoform X9                            |
| DMDXFOLL_010085 | 370     | 1,014   | glutamate receptor delta-1-like                                   |
| DMDXFOLL_004532 | 294     | 770     | DNA helicase MCM8-like                                            |
| DMDXFOLL_000519 | 130     | 339     | RNA-binding motif X-linked 2                                      |
| DMDXFOLL_004346 | 258     | 670     | suppressor of lurcher 1                                           |
| DMDXFOLL_001802 | 463     | 1,185   | von Willebrand factor type EGF and pentraxin domain-containing 1  |
| DMDXFOLL_005387 | 154     | 391     | CCAAT enhancer-binding gamma-like                                 |
| DMDXFOLL_002434 | 149     | 378     | iron-sulfur cluster assembly 2 mitochondrial                      |
| DMDXFOLL_000594 | 242     | 593     | alkylated DNA repair alkB homolog 8                               |
| DMDXFOLL_005803 | 178     | 436     | tachykinin-like peptides receptor 99D                             |
| DMDXFOLL_010004 | 657     | 1,601   | hepatocyte nuclear factor 6 isoform X3                            |
| DMDXFOLL_002872 | 321     | 779     | sarcalumenin-like isoform X2                                      |
| DMDXFOLL_007387 | 194     | 457     | class A basic helix-loop-helix 15-like                            |
| DMDXFOLL_005646 | 127     | 293     | NA                                                                |
| DMDXFOLL_006282 | 98      | 226     | zinc finger CCCH domain-containing 41-like                        |
| DMDXFOLL_009539 | 188     | 422     | potassium voltage-gated channel subfamily KQT member 2 isoform X1 |
| DMDXFOLL_007218 | 775     | 1,739   | low-density lipo                                                  |
| DMDXFOLL_010102 | 280     | 624     | neuronal acetylcholine receptor subunit alpha-7 isoform X1        |
| DMDXFOLL_009219 | 332     | 730     | C-ets-1-like isoform X1                                           |
| DMDXFOLL_004796 | 509     | 1,109   | Shroom2 isoform X2                                                |
| DMDXFOLL_008193 | 147     | 320     | uncharacterized serine-rich -like                                 |
| DMDXFOLL_006964 | 497     | 1,080   | homeobox ceh-9                                                    |
| DMDXFOLL_000555 | 96      | 205     | NA                                                                |
| DMDXFOLL_003743 | 229     | 488     | lin-28 homolog                                                    |

|                 |     |       |                                                                                      |
|-----------------|-----|-------|--------------------------------------------------------------------------------------|
| DMDXFOLL_008558 | 370 | 787   | histone acetyltransferase KAT6A-like                                                 |
| DMDXFOLL_009331 | 230 | 481   | forkhead box F1                                                                      |
| DMDXFOLL_003624 | 107 | 222   | serum response factor homolog B-like                                                 |
| DMDXFOLL_006709 | 217 | 450   | von Willebrand factor C and EGF domain-containing                                    |
| DMDXFOLL_002777 | 590 | 1,220 | tRNA-dihydrouridine(47) synthase [NAD(P)(+)]-like                                    |
| DMDXFOLL_008265 | 277 | 565   | galactosamine (N-acetyl)-6-sulfate sulfatase                                         |
| DMDXFOLL_003162 | 219 | 446   | serine threonine-phosphatase 2A 55 kDa regulatory subunit B delta isoform isoform X3 |
| DMDXFOLL_007010 | 411 | 837   | homeobox HMX3                                                                        |

**Tab. SI 2 Orthogroups of Demodex rapidly expanding**

| Orthogroup ID | Consensus KEGG K number | KEGG K title                                                                                  |
|---------------|-------------------------|-----------------------------------------------------------------------------------------------|
| OG0000063     | NA                      | NA                                                                                            |
| OG0000064     | NA                      | NA                                                                                            |
| OG0000121     | NA                      | NA                                                                                            |
| OG0000129     | NA                      | NA                                                                                            |
| OG0000132     | NA                      | NA                                                                                            |
| OG0000256     | K08592                  | SEN1; sentrin-specific protease 1 [EC:3.4.22.68]                                              |
| OG0000283     | K06704                  | ADAM10, CD156c; disintegrin and metalloproteinase domain-containing protein 10 [EC:3.4.24.81] |
| OG0000428     | K15695                  | RNF103, KF1; E3 ubiquitin-protein ligase RNF103 [EC:2.3.2.27]                                 |

KEGG analysis of orthogroups expanding in Demodex compared to Acari.

Table SI 3

Minimal genome sizes and number of coding genes per taxonomic clade in the Pan-Arthropoda

|                                    |                            |                                   | genome size | coding genes    |
|------------------------------------|----------------------------|-----------------------------------|-------------|-----------------|
| Arthropoda                         |                            |                                   |             |                 |
| Chelicerata                        |                            |                                   |             |                 |
| Arachnida                          |                            |                                   |             |                 |
| Acari                              |                            |                                   |             |                 |
| Acariformes                        |                            |                                   |             |                 |
| Sarcoptiformes                     |                            |                                   |             |                 |
| Astigmata                          |                            |                                   |             |                 |
| <i>Sarcoptes scabiei</i>           | scabies mite               | GCA_000828355.1<br>GenBank median | 56.3        | 10,473<br>9,830 |
| Oribatida                          |                            |                                   |             |                 |
| <i>Steganacarus magnus</i>         | predatory mite             |                                   | 426.5       | 13,305          |
| Endeostigmata                      |                            |                                   |             |                 |
| Eriophycoidea                      |                            |                                   |             |                 |
| <i>Aculops lycopersici</i>         | tomato russet mite         | GCA_015350385.1                   | 32.5        | 10,263          |
| Trombidiformes                     |                            |                                   |             |                 |
| Prostigmata                        |                            |                                   |             |                 |
| <i>Brevipalpus yothersi</i>        | false spider mite          | GCA_003956705.1                   | 71.2        | ~ 16,000        |
| <b><i>Demodex folliculorum</i></b> | <b>human follicle mite</b> | <b>awaiting assignment</b>        | <b>51.6</b> | <b>9,707</b>    |
| Parasitiformes                     |                            |                                   |             |                 |
| Ixodida, Ixodoidea                 |                            |                                   |             |                 |
| <i>Ixodes scapularis</i>           | black-legged tick          | Randall et al. (2018)             | 1,760.0     | 20,467          |
| Mesostigmata, Monogynaspida        |                            |                                   |             |                 |
| <i>Galendromus occidentalis</i>    | western predatory mite     | GCA_000255335.1                   | 151.7       | 11,944          |

|                  |                                     |                         |                 |         |        |
|------------------|-------------------------------------|-------------------------|-----------------|---------|--------|
| Araneae          |                                     |                         |                 |         |        |
|                  | <i>Latrodectus hesperus</i>         | western black widow     | GCA_000697925.2 | 1,234.0 | ?      |
| Pseudoscorpiones |                                     |                         |                 |         |        |
|                  | <i>Cordylochernes scorpioides</i>   | pseudoscorpion          | QEEW00000000.1  | 2,807.1 | ?      |
| Scorpiones       |                                     |                         |                 |         |        |
|                  | <i>Centruroides sculpturatus</i>    | bark scorpion           | GCA_000671375.2 | 925.5   | 35,529 |
| Merostomata      |                                     |                         |                 |         |        |
|                  | <i>Carcinoscorpius rotundicauda</i> | mangrove horseshoe crab | GCA_011833715.1 | 1,669.0 | 25,985 |
| Mandibulata      |                                     |                         |                 |         |        |
| Myriapoda        |                                     |                         |                 |         |        |
|                  | <i>Strigamia maritima</i>           | centipede               | GCA_000239455.1 | 176.2   | 13,233 |
| Pancrustacea     |                                     |                         |                 |         |        |
| Crustacea        |                                     |                         |                 |         |        |
| Branchiopoda     |                                     |                         |                 |         |        |
|                  | <i>Lepidurus arcticus</i>           | tadpole shrimp          | GCA_003724045.1 | 73.1    | 10,718 |
| Multicrustacea   |                                     |                         |                 |         |        |
|                  | <i>Oithona nana</i>                 | copepod                 | GCA_900157175.1 | 85.0    | ?      |
| Hexapoda         |                                     |                         |                 |         |        |
| Collembola       |                                     |                         |                 |         |        |
|                  | <i>Pseudachorutes palmiensis</i>    | springtail              | VNWX00000000.1  | 77.1    | ?      |
| Diplura          |                                     |                         |                 |         |        |
|                  | <i>Catajapyx aquilonaris</i>        | earwig-like entroph     | JYFJ00000000.2  | 285.6   | ?      |
| Insecta          |                                     |                         |                 |         |        |
|                  | <i>Clunio marinus</i>               | marine midge            | GCA_900005825.1 | 85.5    | 22,620 |
| Onychophora      |                                     |                         |                 |         |        |
|                  | <i>Euperipatoides rowelli</i>       | velvet worm             | PXIH00000000.1  | 1,745.2 | ?      |
| Tartigrada       |                                     |                         |                 |         |        |



*Ramazzottius varieornatus*

water bear

GCA\_001949185.1

55.8

22,994

Smallest genome size per taxonomic clade in Mbp based on assembly length, not on genome size estimates; vernacular name, and number of coding genes, where known; GenBank or INSDC code as of May 2021. The placement of the Eriophycoidea follows hypothesis 4 of Klimov et al. (2018) and is supported by Arribas et al. (2020) and Greenhalgh et al. (2020).

Table SI 4

## Species used in genome analysis

| <i>Species</i>                   | <i>Vernacular name</i>   | <i>Accession/genome version)</i>            | <i>Total assembly length</i><br><i>(Mb)</i> |
|----------------------------------|--------------------------|---------------------------------------------|---------------------------------------------|
| <i>Demodex folliculorum</i>      | Human follicle mite      | D_folliculorum_v1.1assembly_v02_annotations | 51.5                                        |
| <i>Sarcoptes scabiei</i>         | Itch mite                | GCA_000828355.1_SarSca1.0                   | 56.3                                        |
| <i>Tetranychus urticae</i>       | Two spotted spider mite  | 20160622                                    | 90.8                                        |
| <i>Ixodes scapularis</i>         | Black-legged tick        | IscaW1.4                                    | 1,765                                       |
| <i>Galendromus occidentalis</i>  | Western predatory mite   | GCF_000255335.1_Mocc_1.0                    | 152                                         |
| <i>Dermatophagoides farinae</i>  | American house dust mite | Dfarinae1.0                                 | 53.5                                        |
| <i>Parasteatoda tepidariorum</i> | Common house spider      | GCF_000365465.2_v2.0                        | 1,445.4                                     |
| <i>Tropilaelaps mercedesae</i>   | Asian bee mite           | T._mercedesae_v01                           | 352.5                                       |
| <i>Stegodyphus mimosarum</i>     | Spider                   | GCA_000611955.2                             | 2,738.7                                     |
| <i>Centruroides sculpturatus</i> | Bark scorpion            | GCA_000671375.2_Cexi_2.0                    | 925.5                                       |
| <i>Varroa jacobsoni</i>          | Bee mite                 | GCA_002532875.1_vjacob_1.0                  | 365.6                                       |
| <i>Daphnia pulex</i>             | Water flea               | GCA_000187875.1_V1.0                        | 197.2                                       |
| <i>Tribolium castaneum</i>       | Red flour beetle         | GCF_000002335.3_Tcas5.2                     | 165.9                                       |
| <i>Drosophila melanogaster</i>   | Fruit fly, vinegar fly   | GCF_000001215.4_Release_6                   | 143.7                                       |
| <i>Limulus polyphemus</i>        | Atlantic horseshoe crab  | GCF_000517525.1                             | 1,828.3                                     |

| Species                          | No. scaffolds | No. proteins<br>(longest<br>isoform) | Scaffold N50<br>(Kb) | Scaffold L50 | GC<br>content | Data source                                      |
|----------------------------------|---------------|--------------------------------------|----------------------|--------------|---------------|--------------------------------------------------|
| <i>Demodex folliculorum</i>      | 241           | 9,707                                | 488                  | 31           | 31.3          | Current study                                    |
| <i>Sarcoptes scabiei</i>         | 18,861        | 10,473                               | 11.6                 | 972          | 33.3          | NCBI                                             |
| <i>Tetranychus urticae</i>       | 640           | 19,104                               | 2,993                | 10           | 32.3          | bioinformatics.psb.ugent.be<br>/gdb/tetranychus/ |
| <i>Ixodes scapularis</i>         | 369,492       | 20,486                               | 76.2                 | 3,623        | 45.2          | Vectorbase                                       |
| <i>Galendromus occidentalis</i>  | 2,211         | 11,710                               | 896.8                | 52           | 51.6          | NCBI                                             |
| <i>Dermatophagoides farinae</i>  | 515           | 16,376                               | 186.3                | 85           | 30.6          | Personal communication                           |
| <i>Parasteatoda tepidariorum</i> | 16,533        | 18,601                               | 4,055.4              | 94           | 32.9          | NCBI                                             |
| <i>Tropilaelaps mercedesae</i>   | 33,764        | 14,303                               | 28.9                 | 3,629        | 40.9          | NCBI                                             |
| <i>Stegodyphus mimosarum</i>     | 68,653        | 27,135                               | 480.6                | 1,734        | 33.8          | NCBI                                             |
| <i>Centruroides sculpturatus</i> | 8,338         | 24,591                               | 537.5                | 523          | 31.4          | NCBI                                             |
| <i>Varroa jacobsoni</i>          | 4,881         | 10,739                               | 233.8                | 482          | 40.9          | NCBI                                             |
| <i>Daphnia pulex</i>             | 5,186         | 30,590                               | 642.1                | 75           | 42.4          | NCBI                                             |
| <i>Tribolium castaneum</i>       | 2,149         | 12,873                               | 4.5                  | 12           | 35.2          | NCBI                                             |
| <i>Drosophila melanogaster</i>   | 1,870         | 13,929                               | 25.3                 | 3            | 42.1          | NCBI                                             |
| <i>Limulus polyphemus</i>        | 286,793       | 22,873                               | 254.1                | 1,712        | 34.5          | NCBI                                             |

Table SI 5

## Repeat content of mite genomes

|                                    | No. RepeatModeler families | Percent total repeats | Taxonomy          |
|------------------------------------|----------------------------|-----------------------|-------------------|
| <i>Aculops lycopersici</i>         | 13                         | 2.1 %                 | Acariforme        |
| <b><i>Demodex folliculorum</i></b> | <b>164</b>                 | <b>7.2 %</b>          | <b>Acariforme</b> |
| <i>Sarcoptes scabiei</i>           | 49                         | 9.3 %                 | Acariforme        |
| <i>Tetranychus urticae</i>         | 484                        | 12.5 %                | Acariforme        |
| <i>Dermatophagoides farinae</i>    | 40                         | 11.0 %                | Acariforme        |
| <i>Metaseiulus occidentalis</i>    | 593                        | 9.3 %                 | Parasitiforme     |
| <i>Ixodes scapularis</i>           | 3,497                      | 41.7 %                | Parasitiforme     |
| <i>Drosophila melanogaster</i>     | 808                        | 22.6 %                | Insect            |

**Table SI 6**

Intergenic distances and introns

| Species*                           | Acari                       |                            |                            |                                 |                          | Parsitiformes            |                                 | Araneae                          | Insecta                                   |
|------------------------------------|-----------------------------|----------------------------|----------------------------|---------------------------------|--------------------------|--------------------------|---------------------------------|----------------------------------|-------------------------------------------|
|                                    | <i>Demodex folliculorum</i> | <i>Aculops lycopersici</i> | <i>Tetranychus urticae</i> | <i>Dermatophagoides farinae</i> | <i>Sarcoptes scabiei</i> | <i>Ixodes scapularis</i> | <i>Galendromus occidentalis</i> | <i>Parasteatoda tepidariorum</i> | Diptera<br><i>Drosophila melanogaster</i> |
| mean intron length (bp)            | <b>514</b>                  |                            | 502                        | 693                             | 147                      | 2,920                    | 625                             | 4,324                            | 1,067                                     |
| median intron length (bp)          | <b>79</b>                   | 170                        | 94                         | 95                              | 69                       | 1,602                    | 133                             | 1,850                            | 69                                        |
| mean intron count per gene         | <b>2.83</b>                 | 0.30                       | 2.35                       | 1.93                            | 2.03                     | 3.33                     | 4.61                            | 6.2                              | 2.94                                      |
| mean exon length (bp)              | <b>383</b>                  |                            | 319                        | 456                             | 367                      | 197                      | 266                             | 198                              | 400                                       |
| median exon length (bp)            | <b>180</b>                  |                            | 156                        | 279                             | 203                      | 143                      | 171                             | 129                              | 215                                       |
| mean distance between CDS (bp) *   | <b>2,429</b>                |                            | 2,630                      | 1,850                           | 1,526                    | 2,6615                   | 8,028                           | 44,743                           | 5,668                                     |
| median distance between CDS (bp) § | <b>1,293</b>                | 538                        | 1,313                      | 630                             | 749                      | 9,236                    | 2,890                           | 14,217                           | 1,197                                     |

\*Data is for coding sequences only and is for one CDS per gene. No filtering on raw numbers has been performed, so annotation quality may play a role in differences.

§ Distance between CDS annotations does not include distance between last CDS and scaffold ends.

Acariformes have reduced their intergenic and intronic content compared to most arachnids, and a little more than *Drosophila* too. Intron numbers are lower in Acariformes, except for *Demodex*. Intron length is shorter on average in Acariformes as well even when compared to *Galendromus occidentalis* and *Drosophila*. Intergenic distance is also lower in Acariformes than all else, though *Melanogaster* is close. *D. melanogaster* sometimes is close to Acariformes based on median, but not mean, suggesting wider variation in metrics in *D. melanogaster*.

Within Acariformes, there is phylogenetic divergence: the Sarcoptiformes, *Sarcoptes scabiei*, have much shorter distances between CDSs; and slightly longer exons.



**Fig. SI 3.** Host association determines the extend of AT-bias in Acariformes based on the *Srp54K* gene, green host-associated, red free-living. Demodex is at a derived position at around 1 o'clock.



# Genome-wide codon usage bias in Acariformes

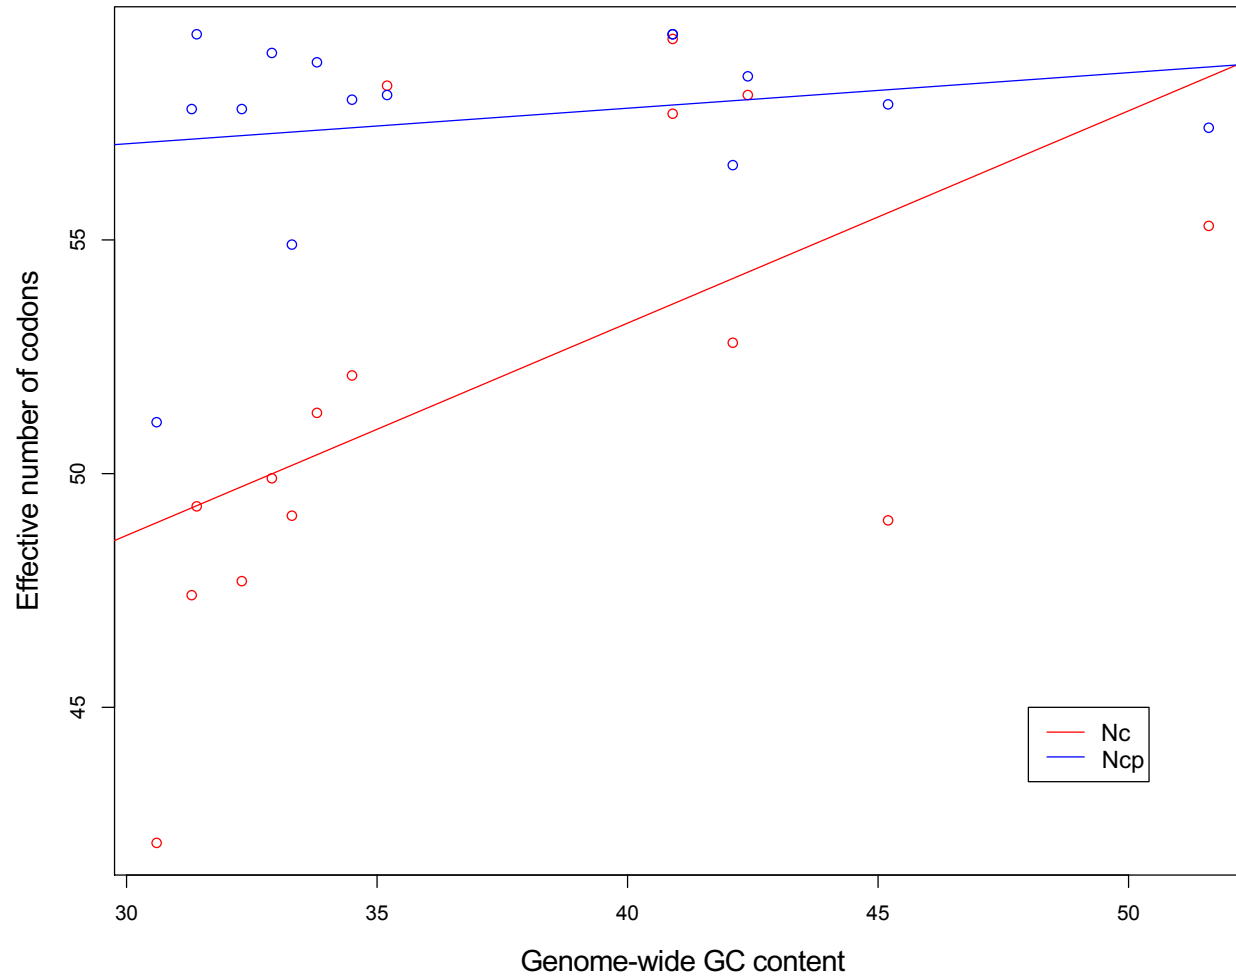

**Fig. SI 4.** Genome-wide codon usage bias seen in acariformes is more likely due to mutational bias leading to a higher frequency of codons containing adenine or thymine in the second and/or third position. ENCprime was used to calculate NC, the number of effective codons across coding sequence sets, as well as Ncp (Nc prime or Nc'), a measure of codon use corrected by the background mutation pattern. Corrections were performed using the nucleotide frequency of the third codon position for each respective gene under study.

### Mutation spectrum for Demodex demonstrates an AT-mutational bias

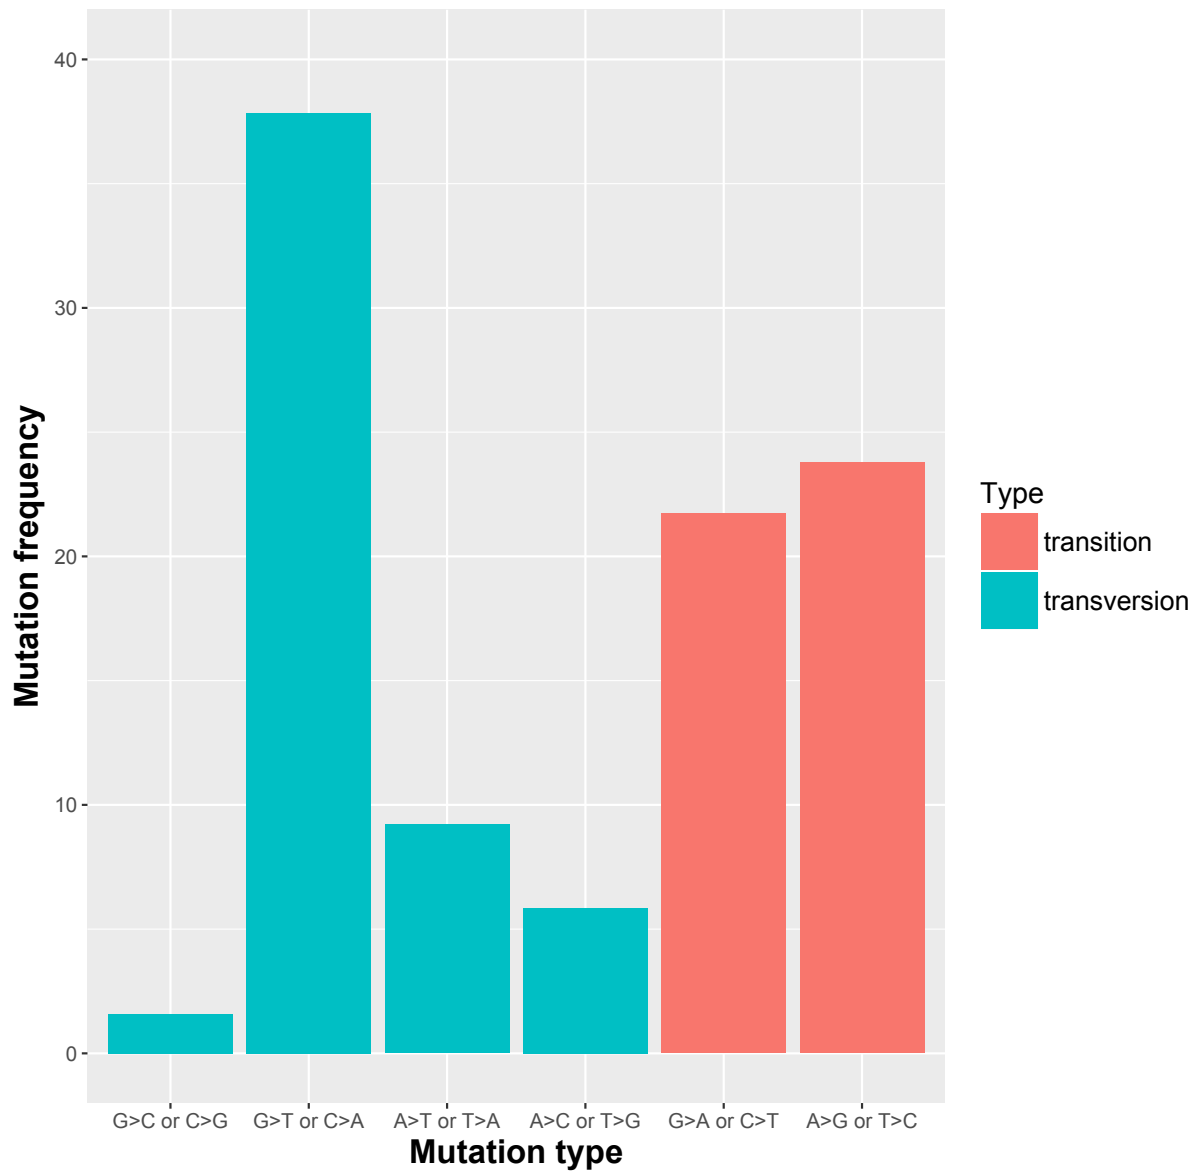

**Fig. SI 5.** Mutation spectrum for Demodex demonstrates an AT-mutational bias. Frequency is for all mutation types discovered in RNA-sequencing data.

Table SI 7

## Orthogroups (OGs) of arthropod species

| Species                          | # genes      | # genes<br>in OGs | #<br>unassigned<br>genes | % genes<br>in OGs | %<br>unassigned<br>genes | # OGs<br>containing<br>species | % OGs<br>containing<br>species | #<br>species-<br>specific<br>OG | # genes<br>in<br>species-<br>specific<br>OGs | % genes<br>in<br>species-<br>specific<br>OGs |
|----------------------------------|--------------|-------------------|--------------------------|-------------------|--------------------------|--------------------------------|--------------------------------|---------------------------------|----------------------------------------------|----------------------------------------------|
| <i>Demodex folliculorum</i>      | <b>9,707</b> | <b>8,131</b>      | <b>1,576</b>             | <b>83.8</b>       | <b>16.2</b>              | <b>6,237</b>                   | <b>44.3</b>                    | <b>6</b>                        | <b>46</b>                                    | <b>0.5</b>                                   |
| <i>Sarcoptes scabiei</i>         | 10,473       | 8,440             | 2,033                    | 80.6              | 19.4                     | 6,279                          | 44.6                           | 7                               | 24                                           | 0.2                                          |
| <i>Tetranychus urticae</i>       | 19,104       | 11,939            | 7,165                    | 62.5              | 37.5                     | 6,254                          | 44.4                           | 55                              | 1,111                                        | 5.8                                          |
| <i>Ixodes scapularis</i>         | 20,486       | 14,054            | 6,432                    | 68.6              | 31.4                     | 7,730                          | 54.9                           | 19                              | 95                                           | 0.5                                          |
| <i>Galendromus occidentalis</i>  | 11,710       | 10,851            | 859                      | 92.7              | 7.3                      | 6,975                          | 49.6                           | 6                               | 27                                           | 0.2                                          |
| <i>Dermatophagoides farinae</i>  | 16,376       | 9,413             | 6,963                    | 57.5              | 42.5                     | 6,547                          | 46.5                           | 19                              | 66                                           | 0.4                                          |
| <i>Parasteatoda tepidariorum</i> | 18,601       | 17,049            | 1,552                    | 91.7              | 8.3                      | 8,396                          | 59.7                           | 17                              | 82                                           | 0.4                                          |
| <i>Tropilaelaps mercedesae</i>   | 14,303       | 11,695            | 2,608                    | 81.8              | 18.2                     | 7,602                          | 54                             | 5                               | 12                                           | 0.1                                          |
| <i>Stegodyphus mimosarum</i>     | 27,135       | 20,921            | 6,214                    | 77.1              | 22.9                     | 8,842                          | 62.8                           | 13                              | 61                                           | 0.2                                          |
| <i>Centruroides sculpturatus</i> | 24,591       | 21,700            | 2,891                    | 88.2              | 11.8                     | 8,498                          | 60.4                           | 13                              | 102                                          | 0.4                                          |
| <i>Varroa jacobsoni</i>          | 10,739       | 9,899             | 840                      | 92.2              | 7.8                      | 7,484                          | 53.2                           | 2                               | 4                                            | 0                                            |
| <i>Daphnia pulex</i>             | 30,590       | 17,221            | 13,369                   | 56.3              | 43.7                     | 7,335                          | 52.1                           | 120                             | 972                                          | 3.2                                          |
| <i>Tribolium castaneum</i>       | 12,873       | 11,182            | 1,691                    | 86.9              | 13.1                     | 7,313                          | 52                             | 27                              | 177                                          | 1.4                                          |
| <i>Drosophila melanogaster</i>   | 13,929       | 10,729            | 3,200                    | 77.0              | 23.0                     | 6,957                          | 49.4                           | 29                              | 179                                          | 1.3                                          |
| <i>Limulus polyphemus</i>        | 22,873       | 21,165            | 1,708                    | 92.5              | 7.5                      | 8,500                          | 60.4                           | 12                              | 47                                           | 0.2                                          |

|                                         | Cscu  | <b>Demo2</b> | Derm  | Dmel2 | Dpul2 | IxSc2 | Lpol2 | Gale2 | Ptep2 | Sarc2 |
|-----------------------------------------|-------|--------------|-------|-------|-------|-------|-------|-------|-------|-------|
| # genes                                 | 24591 | <b>9707</b>  | 16376 | 13929 | 30590 | 20486 | 22873 | 11710 | 18601 | 10473 |
| # genes in orthogroups                  | 21700 | <b>8131</b>  | 9413  | 10729 | 17221 | 14054 | 21165 | 10851 | 17049 | 8440  |
| # unassigned genes                      | 2891  | <b>1576</b>  | 6963  | 3200  | 13369 | 6432  | 1708  | 859   | 1552  | 2033  |
| % genes in orthogroups                  | 88.2  | <b>83.8</b>  | 57.5  | 77    | 56.3  | 68.6  | 92.5  | 92.7  | 91.7  | 80.6  |
| % unassigned genes                      | 11.8  | <b>16.2</b>  | 42.5  | 23    | 43.7  | 31.4  | 7.5   | 7.3   | 8.3   | 19.4  |
| # orthogroups containing species        | 8498  | <b>6237</b>  | 6547  | 6957  | 7335  | 7730  | 8500  | 6975  | 8396  | 6279  |
| % orthogroups containing species        | 60.4  | <b>44.3</b>  | 46.5  | 49.4  | 52.1  | 54.9  | 60.4  | 49.6  | 59.7  | 44.6  |
| # species-specific orthogroups          | 13    | <b>6</b>     | 19    | 29    | 120   | 19    | 12    | 6     | 17    | 7     |
| # in species-specific orthogroups       | 102   | <b>46</b>    | 66    | 179   | 972   | 95    | 47    | 27    | 82    | 24    |
| % genes in species-specific orthogroups | 0.4   | <b>0.5</b>   | 0.4   | 1.3   | 3.2   | 0.5   | 0.2   | 0.2   | 0.4   | 0.2   |
|                                         | Smim2 | Tcas2        | Tetr2 | Tmer2 | Vjac  |       |       |       |       |       |
| # genes                                 | 27135 | 12873        | 19104 | 14303 | 10739 |       |       |       |       |       |
| # genes in orthogroups                  | 20921 | 11182        | 11939 | 11695 | 9899  |       |       |       |       |       |
| # unassigned genes                      | 6214  | 1691         | 7165  | 2608  | 840   |       |       |       |       |       |
| % genes in orthogroups                  | 77.1  | 86.9         | 62.5  | 81.8  | 92.2  |       |       |       |       |       |
| % unassigned genes                      | 22.9  | 13.1         | 37.5  | 18.2  | 7.8   |       |       |       |       |       |
| # orthogroups containing species        | 8842  | 7313         | 6254  | 7602  | 7484  |       |       |       |       |       |
| % orthogroups containing species        | 62.8  | 52           | 44.4  | 54    | 53.2  |       |       |       |       |       |
| # species-specific orthogroups          | 13    | 27           | 55    | 5     | 2     |       |       |       |       |       |
| # in species-specific orthogroups       | 61    | 177          | 1111  | 12    | 4     |       |       |       |       |       |
| % genes in species-specific orthogroups | 0.2   | 1.4          | 5.8   | 0.1   | 0     |       |       |       |       |       |

**Table SI 8**

Computational analysis of gene family evolution model parameters

| Replicate | Topology type | Run parameters                               | Lambda estimate                    | Mu estimate                        | Log-Likelihood |
|-----------|---------------|----------------------------------------------|------------------------------------|------------------------------------|----------------|
|           |               |                                              | (All, Acariformes, Parasitiformes) | (All, Acariformes, Parasitiformes) |                |
| 1         | unconstrained | Multi-lamdamu All/Acariformes/Parasitiformes | 0.0009987,0.0005362,0.0006846      | 0.0003055,0.0006493,0.0005634      | -129584        |
| 2         | unconstrained | Multi-lamdamu All/Acariformes/Parasitiformes | 0.0009987,0.0005362,0.0006846      | 0.0003055,0.0006493,0.0005634      | -129584        |
| 3         | unconstrained | Multi-lamdamu All/Acariformes/Parasitiformes | 0.0009987,0.0005362,0.0006846      | 0.0003055,0.0006493,0.0005634      | -129584        |
| 4         | unconstrained | Multi-lamdamu All/Acariformes/Parasitiformes | 0.0009987,0.0005362,0.0006846      | 0.0003055,0.0006493,0.0005634      | -129584        |
| 5         | unconstrained | Multi-lamdamu All/Acariformes/Parasitiformes | 0.0009987,0.0005362,0.0006846      | 0.0003055,0.0006493,0.0005634      | -129584        |
| 1         | unconstrained | Multi-lamdamu All/Acariformes                | 0.0009329,0.0005435                | 0.0003671,0.0006394                | -130372        |
| 2         | unconstrained | Multi-lamdamu All/Acariformes                | 0.0009329,0.0005434                | 0.0003671,0.0006394                | -130372        |
| 3         | unconstrained | Multi-lamdamu All/Acariformes                | 0.0009329,0.0005434                | 0.0003671,0.0006394                | -130372        |
| 4         | unconstrained | Multi-lamdamu All/Acariformes                | 0.0009329,0.0005435                | 0.0003671,0.0006394                | -130372        |
| 5         | unconstrained | Multi-lamdamu All/Acariformes                | 0.0009329,0.0005435                | 0.0003671,0.0006394                | -130372        |
| 1         | unconstrained | Single lamdamu                               | 0.0008591                          | 0.0004289                          | -131605        |
| 2         | unconstrained | Single lamdamu                               | 0.000859                           | 0.0004289                          | -131605        |
| 3         | unconstrained | Single lamdamu                               | 0.0008591                          | 0.0004289                          | -131605        |
| 4         | unconstrained | Single lamdamu                               | 0.000859                           | 0.0004289                          | -131605        |
| 5         | unconstrained | Single lamdamu                               | 0.0008636                          | 0.0004273                          | -131606        |
| 1         | unconstrained | Single lambda                                | 0.0006764                          | NA                                 | -133563        |
| 2         | unconstrained | Single lambda                                | 0.0006764                          | NA                                 | -133563        |
| 3         | unconstrained | Single lambda                                | 0.0006764                          | NA                                 | -133563        |
| 4         | unconstrained | Single lambda                                | 0.0006764                          | NA                                 | -133563        |
| 5         | unconstrained | Single lambda                                | 0.0006764                          | NA                                 | -133563        |
| 1         | constrained   | Multi-lamdamu All/Acariformes/Parasitiformes | 0.0009399,0.0008018,0.0008803      | 0.0002468,0.0013128,0.0008238      | -129336        |

|   |             |                                              |                               |                               |         |
|---|-------------|----------------------------------------------|-------------------------------|-------------------------------|---------|
| 2 | constrained | Multi-lamdamu All/Acariformes/Parasitiformes | 0.0009399,0.0008018,0.0008803 | 0.0002468,0.0013128,0.0008238 | -129336 |
| 3 | constrained | Multi-lamdamu All/Acariformes/Parasitiformes | 0.0009399,0.0008018,0.0008802 | 0.0002468,0.0013127,0.0008238 | -129336 |
| 4 | constrained | Multi-lamdamu All/Acariformes/Parasitiformes | 0.0009398,0.0008018,0.0008802 | 0.0002469,0.0013128,0.0008238 | -129336 |
| 5 | constrained | Multi-lamdamu All/Acariformes/Parasitiformes | 0.0009399,0.0008018,0.0008802 | 0.0002468,0.0013127,0.0008238 | -129336 |
| 1 | constrained | Multi-lamdamu All/Acariformes                | 0.0009604,0.0008559           | 0.0003547,0.001197            | -130603 |
| 2 | constrained | Multi-lamdamu All/Acariformes                | 0.0009604,0.000856            | 0.0003547,0.001197            | -130603 |
| 3 | constrained | Multi-lamdamu All/Acariformes                | 0.0009604,0.000856            | 0.0003547,0.001197            | -130603 |
| 4 | constrained | Multi-lamdamu All/Acariformes                | 0.0009604,0.0008559           | 0.0003547,0.001197            | -130603 |
| 5 | constrained | Multi-lamdamu All/Acariformes                | 0.0009604,0.000856            | 0.0003547,0.001197            | -130603 |
| 1 | constrained | Single lambdamu                              | 0.0009746                     | 0.0004751                     | -132684 |
| 2 | constrained | Single lambdamu                              | 0.0009746                     | 0.0004751                     | -132684 |
| 3 | constrained | Single lambdamu                              | 0.0009746                     | 0.0004751                     | -132684 |
| 4 | constrained | Single lambdamu                              | 0.0009746                     | 0.0004751                     | -132684 |
| 5 | constrained | Single lambdamu                              | 0.0009746                     | 0.0004751                     | -132684 |
| 1 | constrained | Single lambda                                | 0.000761                      | NA                            | -134832 |
| 2 | constrained | Single lambda                                | 0.000761                      | NA                            | -134832 |
| 3 | constrained | Single lambda                                | 0.000761                      | NA                            | -134832 |
| 4 | constrained | Single lambda                                | 0.000761                      | NA                            | -134832 |
| 5 | constrained | Single lambda                                | 0.000761                      | NA                            | -134832 |

Constraint and unconstrained trees were used to examine gene family evolution with the program CAFE (Computational Analysis of Gene Family Evolution) v4.0 (De Bie et al. 2006). Several models of gene family evolution, testing different parameter combinations for the birth (Lambda) and death (Mu) probabilities of genes, were investigated. Each model run demonstrated consistent parameter estimates and log-likelihood values across replicates, suggesting the models successfully converged.

## Computational Analysis of Gene Family Evolution Ihtest histogram

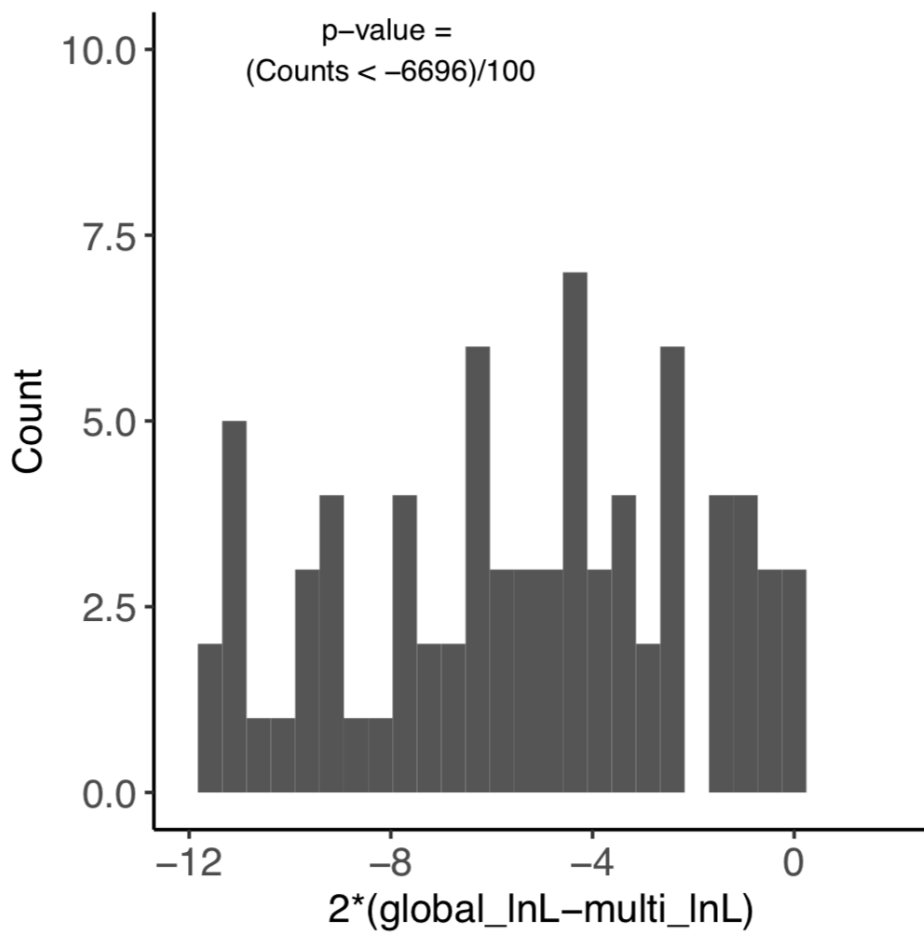

**Figure SI 6.** Selection was more frequently relaxed than intensified during Acariformes evolution. Constraint and unconstrained trees were used to examine gene family evolution with the program CAFE v4.0. A likelihood ratio comparison of a global-lambda model versus multi-lambda model (different birth and death parameters across the tree) demonstrated significant improvement in likelihood when the Acariforme and Parasitiforme branches were allowed separate parameter values (the test likelihood ratio fell in the far tail of the null distribution. For the computational analysis of gene family evolution model parameters, see Tab. SI 8.



## Alternative IQtree topologies

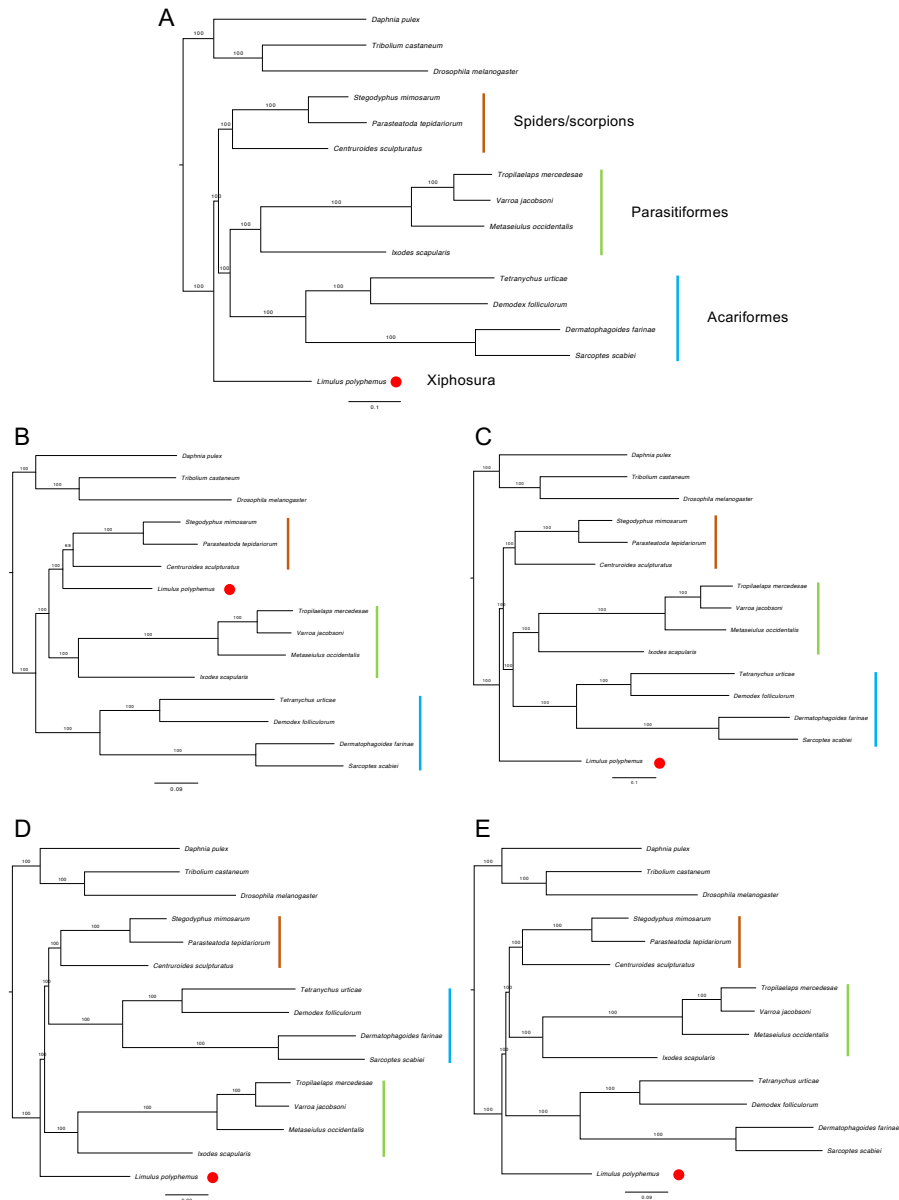

**Figure SI 7.** Alternative IQtree topologies: **A:** unconstrained, **B:** Outgroup constrained, **C:** Acariformes and Parasitiformes monophyletic, **D:** Spiders/scorpions and Acariformes monophyletic, and **E:** Spiders/scorpions and Parasitiformes monophyletic. Phylogenetic reconstruction using several different data sets of concatenated, unpartitioned loci, and partitioned single copy orthologs, including the slowest evolving sites and genes, respectively. However, like Sharma et al., every species tree recovered had the same topology, with Acariformes located at the base of arachnids, and with the horse shoe crab (*Limulus polyphemus*) grouped with spiders and scorpions (Sharma et al. 2014). Several different constrained topologies were tested against our data, with the most likely constraint tree, where *L. polyphemus* was constrained as outgroup to arachnids, resulting in a topology where Acariformes and Parasitiformes were monophyletic, and spiders and scorpions basal. Alternative topologies were significantly less likely compared to this one ( $p \ll 0.05$ ; see below). Both the constraint tree and unconstrained tree were used to examine gene family evolution with the program CAFE. For values of individual trees, see corresponding table in Supplementary file.

Table SI 9

## Gene families showing rapid contraction in Demodex

| ontology           | node_id    | node_name                                       | raw_p_overrep | FWER_<br>overrep | qvalue     |
|--------------------|------------|-------------------------------------------------|---------------|------------------|------------|
| biological_process | GO:0000003 | <b>reproduction</b>                             | 0.000245058   | 0.003            | 0.02725491 |
| biological_process | GO:0006950 | <b>response to stress</b>                       | 0.000332377   | 0.003            | 0.02725491 |
| biological_process | GO:0002376 | <b>immune system process</b>                    | 0.00066175    | 0.012            | 0.03124041 |
| biological_process | GO:0006629 | <b>lipid metabolic process</b>                  | 0.000761961   | 0.021            | 0.03124041 |
| biological_process | GO:0009056 | catabolic process                               | 0.006247036   | 0.167            | 0.20393705 |
| biological_process | GO:0006790 | sulfur compound metabolic<br>process            | 0.007679403   | 0.19             | 0.20393705 |
| biological_process | GO:0007568 | aging                                           | 0.009022401   | 0.242            | 0.20393705 |
| biological_process | GO:0048856 | anatomical structure development                | 0.010106617   | 0.263            | 0.20393705 |
| biological_process | GO:0042592 | homeostatic process                             | 0.012847617   | 0.29             | 0.20393705 |
| biological_process | GO:0065008 | regulation of biological quality                | 0.012847617   | 0.29             | 0.20393705 |
| biological_process | GO:0032502 | developmental process                           | 0.015683056   | 0.33             | 0.20393705 |
| biological_process | GO:0051179 | localization                                    | 0.016923338   | 0.362            | 0.20393705 |
| biological_process | GO:0019748 | secondary metabolic process                     | 0.017470317   | 0.382            | 0.20393705 |
| biological_process | GO:0055085 | transmembrane transport                         | 0.019008746   | 0.417            | 0.20393705 |
| biological_process | GO:0040011 | locomotion                                      | 0.020443037   | 0.443            | 0.20393705 |
| biological_process | GO:0006810 | transport                                       | 0.022870499   | 0.47             | 0.20393705 |
| biological_process | GO:0051234 | establishment of localization                   | 0.022870499   | 0.47             | 0.20393705 |
| biological_process | GO:0044403 | symbiont process                                | 0.024870372   | 0.51             | 0.20393705 |
| biological_process | GO:0044419 | interspecies interaction between<br>organisms   | 0.024870372   | 0.51             | 0.20393705 |
| biological_process | GO:0051704 | multi-organism process                          | 0.024870372   | 0.51             | 0.20393705 |
| biological_process | GO:0050896 | response to stimulus                            | 0.027503143   | 0.535            | 0.21478645 |
| biological_process | GO:0044281 | small molecule metabolic process                | 0.047013759   | 0.681            | 0.3504662  |
| biological_process | GO:0071554 | cell wall organization or biogenesis            | 0.06273701    | 0.789            | 0.44734216 |
| biological_process | GO:0006928 | movement of cell or subcellular<br>component    | 0.073181626   | 0.85             | 0.46160718 |
| biological_process | GO:0048870 | cell motility                                   | 0.073181626   | 0.85             | 0.46160718 |
| biological_process | GO:0051674 | localization of cell                            | 0.073181626   | 0.85             | 0.46160718 |
| biological_process | GO:0008152 | metabolic process                               | 0.078813623   | 0.864            | 0.47871978 |
| biological_process | GO:0030154 | cell differentiation                            | 0.093264571   | 0.874            | 0.54626392 |
| biological_process | GO:0048869 | cellular developmental process                  | 0.102771437   | 0.889            | 0.56260801 |
| biological_process | GO:0016192 | vesicle-mediated transport                      | 0.1029161     | 0.897            | 0.56260801 |
| biological_process | GO:0007155 | cell adhesion                                   | 0.117409573   | 0.917            | 0.60172406 |
| biological_process | GO:0022610 | biological adhesion                             | 0.117409573   | 0.917            | 0.60172406 |
| biological_process | GO:0007005 | mitochondrion organization                      | 0.127290235   | 0.93             | 0.6325939  |
| biological_process | GO:0034330 | cell junction organization                      | 0.199451925   | 0.985            | 0.90304936 |
| biological_process | GO:0065007 | biological regulation                           | 0.200081845   | 0.985            | 0.90304936 |
| biological_process | GO:0022607 | cellular component assembly                     | 0.202729973   | 0.986            | 0.90304936 |
| biological_process | GO:0051186 | cofactor metabolic process                      | 0.203736745   | 0.987            | 0.90304936 |
| biological_process | GO:0051604 | protein maturation                              | 0.217343088   | 0.993            | 0.93800701 |
| biological_process | GO:0034641 | cellular nitrogen compound<br>metabolic process | 0.262660078   | 0.996            | 1          |
| biological_process | GO:0006913 | nucleocytoplasmic transport                     | 0.302944918   | 0.999            | 1          |
| biological_process | GO:0051169 | nuclear transport                               | 0.302944918   | 0.999            | 1          |

| ontology           | node_id    | node_name                                                | raw_p_overrep | FWER_<br>overrep | qvalue |
|--------------------|------------|----------------------------------------------------------|---------------|------------------|--------|
| biological_process | GO:0044238 | primary metabolic process                                | 0.309201542   | 0.999            | 1      |
| biological_process | GO:0071704 | organic substance metabolic process                      | 0.309201542   | 0.999            | 1      |
| biological_process | GO:0005975 | carbohydrate metabolic process                           | 0.318049044   | 0.999            | 1      |
| biological_process | GO:0008283 | cell proliferation                                       | 0.331043814   | 0.999            | 1      |
| biological_process | GO:0007154 | cell communication                                       | 0.342388669   | 0.999            | 1      |
| biological_process | GO:0023052 | signaling                                                | 0.342388669   | 0.999            | 1      |
| biological_process | GO:0044085 | cellular component biogenesis                            | 0.351129691   | 0.999            | 1      |
| biological_process | GO:0006259 | DNA metabolic process                                    | 0.371485078   | 1                | 1      |
| biological_process | GO:0008219 | cell death                                               | 0.380568189   | 1                | 1      |
| biological_process | GO:0006914 | autophagy                                                | 0.422077586   | 1                | 1      |
| biological_process | GO:0061919 | process utilizing autophagic mechanism                   | 0.422077586   | 1                | 1      |
| biological_process | GO:0016043 | cellular component organization                          | 0.434496725   | 1                | 1      |
| biological_process | GO:0090304 | nucleic acid metabolic process                           | 0.443986963   | 1                | 1      |
| biological_process | GO:0048646 | anatomical structure formation involved in morphogenesis | 0.445251545   | 1                | 1      |
| biological_process | GO:0021700 | developmental maturation                                 | 0.465933427   | 1                | 1      |
| biological_process | GO:0044237 | cellular metabolic process                               | 0.480261342   | 1                | 1      |
| biological_process | GO:0000902 | cell morphogenesis                                       | 0.501535874   | 1                | 1      |
| biological_process | GO:0032989 | cellular component morphogenesis                         | 0.501535874   | 1                | 1      |
| biological_process | GO:0061024 | membrane organization                                    | 0.506579824   | 1                | 1      |
| biological_process | GO:0006091 | generation of precursor metabolites and energy           | 0.512850603   | 1                | 1      |
| biological_process | GO:0009653 | anatomical structure morphogenesis                       | 0.513956066   | 1                | 1      |
| biological_process | GO:0009987 | cellular process                                         | 0.523977308   | 1                | 1      |
| biological_process | GO:0007267 | cell-cell signaling                                      | 0.548995919   | 1                | 1      |
| biological_process | GO:0006139 | nucleobase-containing compound metabolic process         | 0.55642788    | 1                | 1      |
| biological_process | GO:0006725 | cellular aromatic compound metabolic process             | 0.55642788    | 1                | 1      |
| biological_process | GO:0046483 | heterocycle metabolic process                            | 0.55642788    | 1                | 1      |
| biological_process | GO:1901360 | organic cyclic compound metabolic process                | 0.55642788    | 1                | 1      |
| biological_process | GO:0071840 | cellular component organization or biogenesis            | 0.557358456   | 1                | 1      |
| biological_process | GO:0007165 | signal transduction                                      | 0.566280129   | 1                | 1      |
| biological_process | GO:0050789 | regulation of biological process                         | 0.566280129   | 1                | 1      |
| biological_process | GO:0050794 | regulation of cellular process                           | 0.566280129   | 1                | 1      |
| biological_process | GO:0051716 | cellular response to stimulus                            | 0.566280129   | 1                | 1      |
| biological_process | GO:0006396 | RNA processing                                           | 0.569277826   | 1                | 1      |
| biological_process | GO:0006397 | mRNA processing                                          | 0.569277826   | 1                | 1      |
| biological_process | GO:0016071 | mRNA metabolic process                                   | 0.569277826   | 1                | 1      |
| biological_process | GO:0006807 | nitrogen compound metabolic process                      | 0.575412062   | 1                | 1      |
| biological_process | GO:0046907 | intracellular transport                                  | 0.606402652   | 1                | 1      |
| biological_process | GO:0051641 | cellular localization                                    | 0.606402652   | 1                | 1      |
| biological_process | GO:0051649 | establishment of localization in cell                    | 0.606402652   | 1                | 1      |
| biological_process | GO:0006996 | organelle organization                                   | 0.703884896   | 1                | 1      |
| biological_process | GO:0044248 | cellular catabolic process                               | 0.708703423   | 1                | 1      |
| biological_process | GO:0006082 | organic acid metabolic process                           | 0.713230583   | 1                | 1      |

| ontology           | node_id    | node_name                                       | raw_p_overrep | FWER_<br>overrep | qvalue |
|--------------------|------------|-------------------------------------------------|---------------|------------------|--------|
| biological_process | GO:0006520 | cellular amino acid metabolic process           | 0.713230583   | 1                | 1      |
| biological_process | GO:0019752 | carboxylic acid metabolic process               | 0.713230583   | 1                | 1      |
| biological_process | GO:0043436 | oxoacid metabolic process                       | 0.713230583   | 1                | 1      |
| biological_process | GO:0016070 | RNA metabolic process                           | 0.716211023   | 1                | 1      |
| biological_process | GO:0050877 | nervous system process                          | 0.783465346   | 1                | 1      |
| biological_process | GO:0007010 | cytoskeleton organization                       | 0.795695486   | 1                | 1      |
| biological_process | GO:0003008 | system process                                  | 0.813299838   | 1                | 1      |
| biological_process | GO:0043933 | protein-containing complex subunit organization | 0.814288624   | 1                | 1      |
| biological_process | GO:0065003 | protein-containing complex assembly             | 0.814288624   | 1                | 1      |
| biological_process | GO:0007275 | multicellular organism development              | 0.817709874   | 1                | 1      |
| biological_process | GO:0009790 | embryo development                              | 0.817709874   | 1                | 1      |
| biological_process | GO:0032501 | multicellular organismal process                | 0.818071026   | 1                | 1      |
| biological_process | GO:0009058 | biosynthetic process                            | 0.830778115   | 1                | 1      |
| biological_process | GO:0010467 | gene expression                                 | 0.906486839   | 1                | 1      |
| biological_process | GO:0007049 | cell cycle                                      | 0.90925124    | 1                | 1      |
| biological_process | GO:0043170 | macromolecule metabolic process                 | 0.948710932   | 1                | 1      |
| biological_process | GO:1901564 | organonitrogen compound metabolic process       | 0.951827599   | 1                | 1      |
| biological_process | GO:0044260 | cellular macromolecule metabolic process        | 0.963070644   | 1                | 1      |
| biological_process | GO:0019538 | protein metabolic process                       | 0.980979132   | 1                | 1      |
| biological_process | GO:0006464 | cellular protein modification process           | 0.987889042   | 1                | 1      |
| biological_process | GO:0036211 | protein modification process                    | 0.987889042   | 1                | 1      |
| biological_process | GO:0043412 | macromolecule modification                      | 0.987889042   | 1                | 1      |
| biological_process | GO:0044267 | cellular protein metabolic process              | 0.99702158    | 1                | 1      |
| biological_process | GO:0008150 | biological_process                              | 1             | 1                | 1      |
| biological_process | GO:0071941 | nitrogen cycle metabolic process                | 1             | 1                | 1      |
| biological_process | GO:0032196 | transposition                                   | 1             | 1                | 1      |
| biological_process | GO:0007009 | plasma membrane organization                    | 1             | 1                | 1      |
| biological_process | GO:0010256 | endomembrane system organization                | 1             | 1                | 1      |
| biological_process | GO:0007034 | vacuolar transport                              | 1             | 1                | 1      |
| biological_process | GO:0030198 | extracellular matrix organization               | 1             | 1                | 1      |
| biological_process | GO:0043062 | extracellular structure organization            | 1             | 1                | 1      |
| biological_process | GO:0003013 | circulatory system process                      | 1             | 1                | 1      |
| biological_process | GO:0030705 | cytoskeleton-dependent intracellular transport  | 1             | 1                | 1      |
| biological_process | GO:0043473 | pigmentation                                    | 1             | 1                | 1      |
| biological_process | GO:0006457 | protein folding                                 | 1             | 1                | 1      |
| biological_process | GO:0006605 | protein targeting                               | 1             | 1                | 1      |
| biological_process | GO:0006886 | intracellular protein transport                 | 1             | 1                | 1      |
| biological_process | GO:0008104 | protein localization                            | 1             | 1                | 1      |
| biological_process | GO:0015031 | protein transport                               | 1             | 1                | 1      |
| biological_process | GO:0015833 | peptide transport                               | 1             | 1                | 1      |
| biological_process | GO:0033036 | macromolecule localization                      | 1             | 1                | 1      |
| biological_process | GO:0034613 | cellular protein localization                   | 1             | 1                | 1      |
| biological_process | GO:0042886 | amide transport                                 | 1             | 1                | 1      |

| ontology           | node_id    | node_name                                        | raw_p_overrep | FWER_<br>overrep | qvalue |
|--------------------|------------|--------------------------------------------------|---------------|------------------|--------|
| biological_process | GO:0045184 | establishment of protein localization            | 1             | 1                | 1      |
| biological_process | GO:0070727 | cellular macromolecule localization              | 1             | 1                | 1      |
| biological_process | GO:0071702 | organic substance transport                      | 1             | 1                | 1      |
| biological_process | GO:0071705 | nitrogen compound transport                      | 1             | 1                | 1      |
| biological_process | GO:0022618 | ribonucleoprotein complex assembly               | 1             | 1                | 1      |
| biological_process | GO:0034622 | cellular protein-containing complex assembly     | 1             | 1                | 1      |
| biological_process | GO:0071826 | ribonucleoprotein complex subunit organization   | 1             | 1                | 1      |
| biological_process | GO:0006399 | tRNA metabolic process                           | 1             | 1                | 1      |
| biological_process | GO:0034660 | ncRNA metabolic process                          | 1             | 1                | 1      |
| biological_process | GO:0000280 | nuclear division                                 | 1             | 1                | 1      |
| biological_process | GO:0022402 | cell cycle process                               | 1             | 1                | 1      |
| biological_process | GO:0048285 | organelle fission                                | 1             | 1                | 1      |
| biological_process | GO:0140014 | mitotic nuclear division                         | 1             | 1                | 1      |
| biological_process | GO:1903047 | mitotic cell cycle process                       | 1             | 1                | 1      |
| biological_process | GO:0007059 | chromosome segregation                           | 1             | 1                | 1      |
| biological_process | GO:0019439 | aromatic compound catabolic process              | 1             | 1                | 1      |
| biological_process | GO:0034655 | nucleobase-containing compound catabolic process | 1             | 1                | 1      |
| biological_process | GO:0044270 | cellular nitrogen compound catabolic process     | 1             | 1                | 1      |
| biological_process | GO:0046700 | heterocycle catabolic process                    | 1             | 1                | 1      |
| biological_process | GO:1901361 | organic cyclic compound catabolic process        | 1             | 1                | 1      |
| biological_process | GO:1901575 | organic substance catabolic process              | 1             | 1                | 1      |
| biological_process | GO:0051301 | cell division                                    | 1             | 1                | 1      |
| biological_process | GO:0042254 | ribosome biogenesis                              | 1             | 1                | 1      |
| biological_process | GO:0022613 | ribonucleoprotein complex biogenesis             | 1             | 1                | 1      |
| biological_process | GO:0006412 | translation                                      | 1             | 1                | 1      |
| biological_process | GO:0006518 | peptide metabolic process                        | 1             | 1                | 1      |
| biological_process | GO:0009059 | macromolecule biosynthetic process               | 1             | 1                | 1      |
| biological_process | GO:0034645 | cellular macromolecule biosynthetic process      | 1             | 1                | 1      |
| biological_process | GO:0043043 | peptide biosynthetic process                     | 1             | 1                | 1      |
| biological_process | GO:0043603 | cellular amide metabolic process                 | 1             | 1                | 1      |
| biological_process | GO:0043604 | amide biosynthetic process                       | 1             | 1                | 1      |
| biological_process | GO:0044249 | cellular biosynthetic process                    | 1             | 1                | 1      |
| biological_process | GO:0044271 | cellular nitrogen compound biosynthetic process  | 1             | 1                | 1      |
| biological_process | GO:1901566 | organonitrogen compound biosynthetic process     | 1             | 1                | 1      |
| biological_process | GO:1901576 | organic substance biosynthetic process           | 1             | 1                | 1      |
| biological_process | GO:0040007 | growth                                           | 1             | 1                | 1      |
| biological_process | GO:0000278 | mitotic cell cycle                               | 1             | 1                | 1      |
| biological_process | GO:0051276 | chromosome organization                          | 1             | 1                | 1      |

Table SI 10

## Gene families showing rapid contraction in the Acariformes

| ontology           | node_id    | node_name                                                | raw_p_overrep | FWER_overrep | qvalue      |
|--------------------|------------|----------------------------------------------------------|---------------|--------------|-------------|
| biological_process | GO:0000003 | <b>reproduction</b>                                      | 0.00075246    | 0.026        | 0.110618425 |
| biological_process | GO:0040011 | <b>locomotion</b>                                        | 0.002161383   | 0.068        | 0.110618425 |
| biological_process | GO:0051179 | localization                                             | 0.003618482   | 0.114        | 0.110618425 |
| biological_process | GO:0032502 | developmental process                                    | 0.005302367   | 0.164        | 0.110618425 |
| biological_process | GO:0006790 | sulfur compound metabolic process                        | 0.006286359   | 0.206        | 0.110618425 |
| biological_process | GO:0002376 | immune system process                                    | 0.006397885   | 0.208        | 0.110618425 |
| biological_process | GO:0048856 | anatomical structure development                         | 0.006549997   | 0.212        | 0.110618425 |
| biological_process | GO:0055085 | transmembrane transport                                  | 0.007086009   | 0.224        | 0.110618425 |
| biological_process | GO:0007568 | aging                                                    | 0.007715849   | 0.245        | 0.110618425 |
| biological_process | GO:0006928 | movement of cell or subcellular component                | 0.008094031   | 0.266        | 0.110618425 |
| biological_process | GO:0048870 | cell motility                                            | 0.008094031   | 0.266        | 0.110618425 |
| biological_process | GO:0051674 | localization of cell                                     | 0.008094031   | 0.266        | 0.110618425 |
| biological_process | GO:0006950 | response to stress                                       | 0.008844222   | 0.293        | 0.111573268 |
| biological_process | GO:0006810 | transport                                                | 0.016701402   | 0.384        | 0.182601993 |
| biological_process | GO:0051234 | establishment of localization                            | 0.016701402   | 0.384        | 0.182601993 |
| biological_process | GO:0030154 | cell differentiation                                     | 0.019485944   | 0.429        | 0.199730922 |
| biological_process | GO:0048869 | cellular developmental process                           | 0.02328447    | 0.504        | 0.216975628 |
| biological_process | GO:0006629 | lipid metabolic process                                  | 0.023814398   | 0.511        | 0.216975628 |
| biological_process | GO:0007267 | cell-cell signaling                                      | 0.042436087   | 0.73         | 0.34443338  |
| biological_process | GO:0042592 | homeostatic process                                      | 0.044104274   | 0.738        | 0.34443338  |
| biological_process | GO:0065008 | regulation of biological quality                         | 0.044104274   | 0.738        | 0.34443338  |
| biological_process | GO:0019748 | secondary metabolic process                              | 0.052304225   | 0.788        | 0.38990422  |
| biological_process | GO:0051604 | protein maturation                                       | 0.071581325   | 0.867        | 0.459538925 |
| biological_process | GO:0044403 | symbiont process                                         | 0.072853732   | 0.874        | 0.459538925 |
| biological_process | GO:0044419 | interspecies interaction between organisms               | 0.072853732   | 0.874        | 0.459538925 |
| biological_process | GO:0051704 | multi-organism process                                   | 0.072853732   | 0.874        | 0.459538925 |
| biological_process | GO:0008219 | cell death                                               | 0.086779075   | 0.913        | 0.514498092 |
| biological_process | GO:0007155 | cell adhesion                                            | 0.090978321   | 0.919        | 0.514498092 |
| biological_process | GO:0022610 | biological adhesion                                      | 0.090978321   | 0.919        | 0.514498092 |
| biological_process | GO:0032196 | transposition                                            | 0.102562725   | 0.939        | 0.556515136 |
| biological_process | GO:0050896 | response to stimulus                                     | 0.105194934   | 0.941        | 0.556515136 |
| biological_process | GO:0071554 | cell wall organization or biogenesis                     | 0.110629151   | 0.953        | 0.566974397 |
| biological_process | GO:0048646 | anatomical structure formation involved in morphogenesis | 0.130916311   | 0.97         | 0.650614396 |
| biological_process | GO:0009056 | catabolic process                                        | 0.154669718   | 0.979        | 0.746053932 |
| biological_process | GO:0006259 | DNA metabolic process                                    | 0.202384132   | 0.991        | 0.946668035 |
| biological_process | GO:0009653 | anatomical structure morphogenesis                       | 0.209021269   | 0.991        | 0.946668035 |
| biological_process | GO:0007154 | cell communication                                       | 0.219349911   | 0.993        | 0.946668035 |
| biological_process | GO:0023052 | signaling                                                | 0.219349911   | 0.993        | 0.946668035 |
| biological_process | GO:0016192 | vesicle-mediated transport                               | 0.226951806   | 0.997        | 0.954361442 |
| biological_process | GO:0008152 | metabolic process                                        | 0.264042327   | 0.998        | 1           |

| ontology           | node_id    | node_name                                        | raw_p_overrep | FWER_overrep | qvalue |
|--------------------|------------|--------------------------------------------------|---------------|--------------|--------|
| biological_process | GO:0044281 | small molecule metabolic process                 | 0.276655906   | 0.998        | 1      |
| biological_process | GO:0050877 | nervous system process                           | 0.279767473   | 0.998        | 1      |
| biological_process | GO:0021700 | developmental maturation                         | 0.308489507   | 1            | 1      |
| biological_process | GO:0007005 | mitochondrion organization                       | 0.310156903   | 1            | 1      |
| biological_process | GO:0034330 | cell junction organization                       | 0.33138287    | 1            | 1      |
| biological_process | GO:0003008 | system process                                   | 0.337449441   | 1            | 1      |
| biological_process | GO:0065007 | biological regulation                            | 0.339045724   | 1            | 1      |
| biological_process | GO:0005975 | carbohydrate metabolic process                   | 0.341866703   | 1            | 1      |
| biological_process | GO:0022607 | cellular component assembly                      | 0.345528291   | 1            | 1      |
| biological_process | GO:0000902 | cell morphogenesis                               | 0.353074755   | 1            | 1      |
| biological_process | GO:0032989 | cellular component morphogenesis                 | 0.353074755   | 1            | 1      |
| biological_process | GO:0008283 | cell proliferation                               | 0.359300459   | 1            | 1      |
| biological_process | GO:0034641 | cellular nitrogen compound metabolic process     | 0.373643909   | 1            | 1      |
| biological_process | GO:0043473 | pigmentation                                     | 0.447726676   | 1            | 1      |
| biological_process | GO:0051186 | cofactor metabolic process                       | 0.450150205   | 1            | 1      |
| biological_process | GO:0090304 | nucleic acid metabolic process                   | 0.451635461   | 1            | 1      |
| biological_process | GO:0016043 | cellular component organization                  | 0.45512102    | 1            | 1      |
| biological_process | GO:0006913 | nucleocytoplasmic transport                      | 0.479539532   | 1            | 1      |
| biological_process | GO:0051169 | nuclear transport                                | 0.479539532   | 1            | 1      |
| biological_process | GO:0044085 | cellular component biogenesis                    | 0.573067885   | 1            | 1      |
| biological_process | GO:0007275 | multicellular organism development               | 0.578845652   | 1            | 1      |
| biological_process | GO:0009790 | embryo development                               | 0.578845652   | 1            | 1      |
| biological_process | GO:0006139 | nucleobase-containing compound metabolic process | 0.600457204   | 1            | 1      |
| biological_process | GO:0006725 | cellular aromatic compound metabolic process     | 0.600457204   | 1            | 1      |
| biological_process | GO:0046483 | heterocycle metabolic process                    | 0.600457204   | 1            | 1      |
| biological_process | GO:1901360 | organic cyclic compound metabolic process        | 0.600457204   | 1            | 1      |
| biological_process | GO:0071840 | cellular component organization or biogenesis    | 0.617964777   | 1            | 1      |
| biological_process | GO:0044237 | cellular metabolic process                       | 0.624727844   | 1            | 1      |
| biological_process | GO:0006914 | autophagy                                        | 0.629238041   | 1            | 1      |
| biological_process | GO:0061919 | process utilizing autophagic mechanism           | 0.629238041   | 1            | 1      |
| biological_process | GO:0032501 | multicellular organismal process                 | 0.642699034   | 1            | 1      |
| biological_process | GO:0007059 | chromosome segregation                           | 0.64915975    | 1            | 1      |
| biological_process | GO:0044238 | primary metabolic process                        | 0.654166095   | 1            | 1      |
| biological_process | GO:0071704 | organic substance metabolic process              | 0.654166095   | 1            | 1      |
| biological_process | GO:0006807 | nitrogen compound metabolic process              | 0.657432121   | 1            | 1      |
| biological_process | GO:0040007 | growth                                           | 0.692047958   | 1            | 1      |
| biological_process | GO:0007165 | signal transduction                              | 0.692122475   | 1            | 1      |
| biological_process | GO:0050789 | regulation of biological process                 | 0.692122475   | 1            | 1      |
| biological_process | GO:0050794 | regulation of cellular process                   | 0.692122475   | 1            | 1      |
| biological_process | GO:0051716 | cellular response to stimulus                    | 0.692122475   | 1            | 1      |
| biological_process | GO:0061024 | membrane organization                            | 0.721474951   | 1            | 1      |
| biological_process | GO:0006091 | generation of precursor metabolites and energy   | 0.727847321   | 1            | 1      |

| ontology           | node_id    | node_name                                       | raw_p_overrep | FWER_overrep | qvalue |
|--------------------|------------|-------------------------------------------------|---------------|--------------|--------|
| biological_process | GO:0007010 | cytoskeleton organization                       | 0.775744055   | 1            | 1      |
| biological_process | GO:0009987 | cellular process                                | 0.779030697   | 1            | 1      |
| biological_process | GO:0006996 | organelle organization                          | 0.781866266   | 1            | 1      |
| biological_process | GO:0006396 | RNA processing                                  | 0.782196866   | 1            | 1      |
| biological_process | GO:0006397 | mRNA processing                                 | 0.782196866   | 1            | 1      |
| biological_process | GO:0016071 | mRNA metabolic process                          | 0.782196866   | 1            | 1      |
| biological_process | GO:0009058 | biosynthetic process                            | 0.795244716   | 1            | 1      |
| biological_process | GO:0007049 | cell cycle                                      | 0.79549112    | 1            | 1      |
| biological_process | GO:0043933 | protein-containing complex subunit organization | 0.802546635   | 1            | 1      |
| biological_process | GO:0065003 | protein-containing complex assembly             | 0.802546635   | 1            | 1      |
| biological_process | GO:0046907 | intracellular transport                         | 0.814975973   | 1            | 1      |
| biological_process | GO:0051641 | cellular localization                           | 0.814975973   | 1            | 1      |
| biological_process | GO:0051649 | establishment of localization in cell           | 0.814975973   | 1            | 1      |
| biological_process | GO:0044248 | cellular catabolic process                      | 0.892679117   | 1            | 1      |
| biological_process | GO:0006082 | organic acid metabolic process                  | 0.895678378   | 1            | 1      |
| biological_process | GO:0006520 | cellular amino acid metabolic process           | 0.895678378   | 1            | 1      |
| biological_process | GO:0019752 | carboxylic acid metabolic process               | 0.895678378   | 1            | 1      |
| biological_process | GO:0043436 | oxoacid metabolic process                       | 0.895678378   | 1            | 1      |
| biological_process | GO:0016070 | RNA metabolic process                           | 0.897632146   | 1            | 1      |
| biological_process | GO:0010467 | gene expression                                 | 0.924471813   | 1            | 1      |
| biological_process | GO:0051276 | chromosome organization                         | 0.958266433   | 1            | 1      |
| biological_process | GO:0043170 | macromolecule metabolic process                 | 0.962591317   | 1            | 1      |
| biological_process | GO:0044260 | cellular macromolecule metabolic process        | 0.978828947   | 1            | 1      |
| biological_process | GO:1901564 | organonitrogen compound metabolic process       | 0.98873187    | 1            | 1      |
| biological_process | GO:0019538 | protein metabolic process                       | 0.992942032   | 1            | 1      |
| biological_process | GO:0006464 | cellular protein modification process           | 0.996694521   | 1            | 1      |
| biological_process | GO:0036211 | protein modification process                    | 0.996694521   | 1            | 1      |
| biological_process | GO:0043412 | macromolecule modification                      | 0.996694521   | 1            | 1      |
| biological_process | GO:0044267 | cellular protein metabolic process              | 0.999655784   | 1            | 1      |
| biological_process | GO:0008150 | biological_process                              | 1             | 1            | 1      |
| biological_process | GO:0071941 | nitrogen cycle metabolic process                | 1             | 1            | 1      |
| biological_process | GO:0007009 | plasma membrane organization                    | 1             | 1            | 1      |
| biological_process | GO:0010256 | endomembrane system organization                | 1             | 1            | 1      |
| biological_process | GO:0007034 | vacuolar transport                              | 1             | 1            | 1      |
| biological_process | GO:0030198 | extracellular matrix organization               | 1             | 1            | 1      |
| biological_process | GO:0043062 | extracellular structure organization            | 1             | 1            | 1      |
| biological_process | GO:0003013 | circulatory system process                      | 1             | 1            | 1      |
| biological_process | GO:0030705 | cytoskeleton-dependent intracellular transport  | 1             | 1            | 1      |
| biological_process | GO:0006457 | protein folding                                 | 1             | 1            | 1      |
| biological_process | GO:0006605 | protein targeting                               | 1             | 1            | 1      |
| biological_process | GO:0006886 | intracellular protein transport                 | 1             | 1            | 1      |
| biological_process | GO:0008104 | protein localization                            | 1             | 1            | 1      |



| ontology           | node_id    | node_name                                        | raw_p_overrep | FWER_overrep | qvalue |
|--------------------|------------|--------------------------------------------------|---------------|--------------|--------|
| biological_process | GO:0015031 | protein transport                                | 1             | 1            | 1      |
| biological_process | GO:0015833 | peptide transport                                | 1             | 1            | 1      |
| biological_process | GO:0033036 | macromolecule localization                       | 1             | 1            | 1      |
| biological_process | GO:0034613 | cellular protein localization                    | 1             | 1            | 1      |
| biological_process | GO:0042886 | amide transport                                  | 1             | 1            | 1      |
| biological_process | GO:0045184 | establishment of protein localization            | 1             | 1            | 1      |
| biological_process | GO:0070727 | cellular macromolecule localization              | 1             | 1            | 1      |
| biological_process | GO:0071702 | organic substance transport                      | 1             | 1            | 1      |
| biological_process | GO:0071705 | nitrogen compound transport                      | 1             | 1            | 1      |
| biological_process | GO:0022618 | ribonucleoprotein complex assembly               | 1             | 1            | 1      |
| biological_process | GO:0034622 | cellular protein-containing complex assembly     | 1             | 1            | 1      |
| biological_process | GO:0071826 | ribonucleoprotein complex subunit organization   | 1             | 1            | 1      |
| biological_process | GO:0006399 | tRNA metabolic process                           | 1             | 1            | 1      |
| biological_process | GO:0034660 | ncRNA metabolic process                          | 1             | 1            | 1      |
| biological_process | GO:0000280 | nuclear division                                 | 1             | 1            | 1      |
| biological_process | GO:0022402 | cell cycle process                               | 1             | 1            | 1      |
| biological_process | GO:0048285 | organelle fission                                | 1             | 1            | 1      |
| biological_process | GO:0140014 | mitotic nuclear division                         | 1             | 1            | 1      |
| biological_process | GO:1903047 | mitotic cell cycle process                       | 1             | 1            | 1      |
| biological_process | GO:0019439 | aromatic compound catabolic process              | 1             | 1            | 1      |
| biological_process | GO:0034655 | nucleobase-containing compound catabolic process | 1             | 1            | 1      |
| biological_process | GO:0044270 | cellular nitrogen compound catabolic process     | 1             | 1            | 1      |
| biological_process | GO:0046700 | heterocycle catabolic process                    | 1             | 1            | 1      |
| biological_process | GO:1901361 | organic cyclic compound catabolic process        | 1             | 1            | 1      |
| biological_process | GO:1901575 | organic substance catabolic process              | 1             | 1            | 1      |
| biological_process | GO:0051301 | cell division                                    | 1             | 1            | 1      |
| biological_process | GO:0042254 | ribosome biogenesis                              | 1             | 1            | 1      |
| biological_process | GO:0022613 | ribonucleoprotein complex biogenesis             | 1             | 1            | 1      |
| biological_process | GO:0006412 | translation                                      | 1             | 1            | 1      |
| biological_process | GO:0006518 | peptide metabolic process                        | 1             | 1            | 1      |
| biological_process | GO:0009059 | macromolecule biosynthetic process               | 1             | 1            | 1      |
| biological_process | GO:0034645 | cellular macromolecule biosynthetic process      | 1             | 1            | 1      |
| biological_process | GO:0043043 | peptide biosynthetic process                     | 1             | 1            | 1      |
| biological_process | GO:0043603 | cellular amide metabolic process                 | 1             | 1            | 1      |
| biological_process | GO:0043604 | amide biosynthetic process                       | 1             | 1            | 1      |
| biological_process | GO:0044249 | cellular biosynthetic process                    | 1             | 1            | 1      |
| biological_process | GO:0044271 | cellular nitrogen compound biosynthetic process  | 1             | 1            | 1      |
| biological_process | GO:1901566 | organonitrogen compound biosynthetic process     | 1             | 1            | 1      |
| biological_process | GO:1901576 | organic substance biosynthetic process           | 1             | 1            | 1      |
| biological_process | GO:0000278 | mitotic cell cycle                               | 1             | 1            | 1      |

Table SI 11

## Gene families showing rapid expansion in the Acariformes

| ontology           | node_id    | node_name                                        | raw_p_overrep | FWER_overrep | qvalue      |
|--------------------|------------|--------------------------------------------------|---------------|--------------|-------------|
| biological_process | GO:0030154 | <b>cell differentiation</b>                      | 0.000758826   | 0.026        | 0.075680876 |
| biological_process | GO:0048869 | <b>cellular developmental process</b>            | 0.000922938   | 0.028        | 0.075680876 |
| biological_process | GO:0048856 | <b>anatomical structure development</b>          | 0.001987254   | 0.067        | 0.108636548 |
| biological_process | GO:0032502 | <b>developmental process</b>                     | 0.003344292   | 0.092        | 0.112633924 |
| biological_process | GO:0006629 | <b>lipid metabolic process</b>                   | 0.003438321   | 0.093        | 0.112633924 |
| biological_process | GO:0005975 | carbohydrate metabolic process                   | 0.004120753   | 0.121        | 0.112633924 |
| biological_process | GO:0006259 | DNA metabolic process                            | 0.006809496   | 0.179        | 0.159536763 |
| biological_process | GO:0044238 | primary metabolic process                        | 0.011757261   | 0.268        | 0.214243415 |
| biological_process | GO:0071704 | organic substance metabolic process              | 0.011757261   | 0.268        | 0.214243415 |
| biological_process | GO:0009987 | cellular process                                 | 0.024478493   | 0.487        | 0.401447277 |
| biological_process | GO:0000003 | reproduction                                     | 0.039277058   | 0.629        | 0.58558523  |
| biological_process | GO:0002376 | immune system process                            | 0.059950675   | 0.785        | 0.711049681 |
| biological_process | GO:0071554 | cell wall organization or biogenesis             | 0.060395654   | 0.8          | 0.711049681 |
| biological_process | GO:0007568 | aging                                            | 0.06495895    | 0.832        | 0.711049681 |
| biological_process | GO:0007009 | plasma membrane organization                     | 0.069370701   | 0.843        | 0.711049681 |
| biological_process | GO:0010256 | endomembrane system organization                 | 0.069370701   | 0.843        | 0.711049681 |
| biological_process | GO:0090304 | nucleic acid metabolic process                   | 0.078010571   | 0.86         | 0.728374061 |
| biological_process | GO:0008152 | metabolic process                                | 0.108006837   | 0.897        | 0.728374061 |
| biological_process | GO:0050896 | response to stimulus                             | 0.108619193   | 0.901        | 0.728374061 |
| biological_process | GO:0009653 | anatomical structure morphogenesis               | 0.109559465   | 0.903        | 0.728374061 |
| biological_process | GO:0007155 | cell adhesion                                    | 0.109959986   | 0.909        | 0.728374061 |
| biological_process | GO:0022610 | biological adhesion                              | 0.109959986   | 0.909        | 0.728374061 |
| biological_process | GO:0044260 | cellular macromolecule metabolic process         | 0.111350058   | 0.911        | 0.728374061 |
| biological_process | GO:0006950 | response to stress                               | 0.117627012   | 0.918        | 0.728374061 |
| biological_process | GO:0021700 | developmental maturation                         | 0.118511666   | 0.922        | 0.728374061 |
| biological_process | GO:0006139 | nucleobase-containing compound metabolic process | 0.132667593   | 0.946        | 0.728374061 |
| biological_process | GO:0006725 | cellular aromatic compound metabolic process     | 0.132667593   | 0.946        | 0.728374061 |
| biological_process | GO:0046483 | heterocycle metabolic process                    | 0.132667593   | 0.946        | 0.728374061 |
| biological_process | GO:1901360 | organic cyclic compound metabolic process        | 0.132667593   | 0.946        | 0.728374061 |
| biological_process | GO:0009056 | catabolic process                                | 0.144100466   | 0.96         | 0.728374061 |
| biological_process | GO:0006091 | generation of precursor metabolites and energy   | 0.147603293   | 0.965        | 0.728374061 |
| biological_process | GO:0042592 | homeostatic process                              | 0.158670502   | 0.97         | 0.728374061 |
| biological_process | GO:0065008 | regulation of biological quality                 | 0.158670502   | 0.97         | 0.728374061 |
| biological_process | GO:0007154 | cell communication                               | 0.165799716   | 0.972        | 0.728374061 |
| biological_process | GO:0023052 | signaling                                        | 0.165799716   | 0.972        | 0.728374061 |
| biological_process | GO:0065007 | biological regulation                            | 0.169451082   | 0.975        | 0.728374061 |
| biological_process | GO:0007165 | signal transduction                              | 0.182041445   | 0.986        | 0.728374061 |
| biological_process | GO:0050789 | regulation of biological process                 | 0.182041445   | 0.986        | 0.728374061 |
| biological_process | GO:0050794 | regulation of cellular process                   | 0.182041445   | 0.986        | 0.728374061 |
| biological_process | GO:0051716 | cellular response to stimulus                    | 0.182041445   | 0.986        | 0.728374061 |

| ontology           | node_id    | node_name                                                | raw_p_overrep | FWER_overrep | qvalue      |
|--------------------|------------|----------------------------------------------------------|---------------|--------------|-------------|
| biological_process | GO:0034330 | cell junction organization                               | 0.192564658   | 0.994        | 0.728374061 |
| biological_process | GO:0040011 | locomotion                                               | 0.20200589    | 0.995        | 0.728374061 |
| biological_process | GO:0044403 | symbiont process                                         | 0.21182876    | 0.997        | 0.728374061 |
| biological_process | GO:0044419 | interspecies interaction between organisms               | 0.21182876    | 0.997        | 0.728374061 |
| biological_process | GO:0051704 | multi-organism process                                   | 0.21182876    | 0.997        | 0.728374061 |
| biological_process | GO:0000902 | cell morphogenesis                                       | 0.212033514   | 0.997        | 0.728374061 |
| biological_process | GO:0032989 | cellular component morphogenesis                         | 0.212033514   | 0.997        | 0.728374061 |
| biological_process | GO:0043170 | macromolecule metabolic process                          | 0.213182652   | 0.998        | 0.728374061 |
| biological_process | GO:0044281 | small molecule metabolic process                         | 0.228160739   | 0.998        | 0.763640025 |
| biological_process | GO:0006928 | movement of cell or subcellular component                | 0.243221961   | 0.998        | 0.767084645 |
| biological_process | GO:0048870 | cell motility                                            | 0.243221961   | 0.998        | 0.767084645 |
| biological_process | GO:0051674 | localization of cell                                     | 0.243221961   | 0.998        | 0.767084645 |
| biological_process | GO:0006913 | nucleocytoplasmic transport                              | 0.293190212   | 0.998        | 0.890429532 |
| biological_process | GO:0051169 | nuclear transport                                        | 0.293190212   | 0.998        | 0.890429532 |
| biological_process | GO:0051179 | localization                                             | 0.308825213   | 0.998        | 0.920860636 |
| biological_process | GO:0006810 | transport                                                | 0.381950437   | 1            | 1           |
| biological_process | GO:0051234 | establishment of localization                            | 0.381950437   | 1            | 1           |
| biological_process | GO:0016043 | cellular component organization                          | 0.390362777   | 1            | 1           |
| biological_process | GO:0006914 | autophagy                                                | 0.409745256   | 1            | 1           |
| biological_process | GO:0061919 | process utilizing autophagic mechanism                   | 0.409745256   | 1            | 1           |
| biological_process | GO:0048646 | anatomical structure formation involved in morphogenesis | 0.425276384   | 1            | 1           |
| biological_process | GO:0007005 | mitochondrion organization                               | 0.454216394   | 1            | 1           |
| biological_process | GO:0055085 | transmembrane transport                                  | 0.457817797   | 1            | 1           |
| biological_process | GO:0061024 | membrane organization                                    | 0.492973595   | 1            | 1           |
| biological_process | GO:0071840 | cellular component organization or biogenesis            | 0.510470477   | 1            | 1           |
| biological_process | GO:0007267 | cell-cell signaling                                      | 0.527526553   | 1            | 1           |
| biological_process | GO:0051186 | cofactor metabolic process                               | 0.55945645    | 1            | 1           |
| biological_process | GO:0006464 | cellular protein modification process                    | 0.562011557   | 1            | 1           |
| biological_process | GO:0036211 | protein modification process                             | 0.562011557   | 1            | 1           |
| biological_process | GO:0043412 | macromolecule modification                               | 0.562011557   | 1            | 1           |
| biological_process | GO:0044237 | cellular metabolic process                               | 0.569729655   | 1            | 1           |
| biological_process | GO:0046907 | intracellular transport                                  | 0.59201324    | 1            | 1           |
| biological_process | GO:0051641 | cellular localization                                    | 0.59201324    | 1            | 1           |
| biological_process | GO:0051649 | establishment of localization in cell                    | 0.59201324    | 1            | 1           |
| biological_process | GO:0022607 | cellular component assembly                              | 0.601595032   | 1            | 1           |
| biological_process | GO:0007049 | cell cycle                                               | 0.65957998    | 1            | 1           |
| biological_process | GO:0006996 | organelle organization                                   | 0.677643051   | 1            | 1           |
| biological_process | GO:0008283 | cell proliferation                                       | 0.686775765   | 1            | 1           |
| biological_process | GO:0044248 | cellular catabolic process                               | 0.694533821   | 1            | 1           |
| biological_process | GO:0034641 | cellular nitrogen compound metabolic process             | 0.695739754   | 1            | 1           |
| biological_process | GO:0006082 | organic acid metabolic process                           | 0.699099749   | 1            | 1           |
| biological_process | GO:0006520 | cellular amino acid metabolic process                    | 0.699099749   | 1            | 1           |
| biological_process | GO:0019752 | carboxylic acid metabolic process                        | 0.699099749   | 1            | 1           |

| ontology           | node_id    | node_name                                       | raw_p_overrep | FWER_overrep | qvalue |
|--------------------|------------|-------------------------------------------------|---------------|--------------|--------|
| biological_process | GO:0043436 | oxoacid metabolic process                       | 0.699099749   | 1            | 1      |
| biological_process | GO:0006412 | translation                                     | 0.723064429   | 1            | 1      |
| biological_process | GO:0006518 | peptide metabolic process                       | 0.723064429   | 1            | 1      |
| biological_process | GO:0009059 | macromolecule biosynthetic process              | 0.723064429   | 1            | 1      |
| biological_process | GO:0034645 | cellular macromolecule biosynthetic process     | 0.723064429   | 1            | 1      |
| biological_process | GO:0043043 | peptide biosynthetic process                    | 0.723064429   | 1            | 1      |
| biological_process | GO:0043603 | cellular amide metabolic process                | 0.723064429   | 1            | 1      |
| biological_process | GO:0043604 | amide biosynthetic process                      | 0.723064429   | 1            | 1      |
| biological_process | GO:0044249 | cellular biosynthetic process                   | 0.723064429   | 1            | 1      |
| biological_process | GO:0044271 | cellular nitrogen compound biosynthetic process | 0.723064429   | 1            | 1      |
| biological_process | GO:1901566 | organonitrogen compound biosynthetic process    | 0.723064429   | 1            | 1      |
| biological_process | GO:1901576 | organic substance biosynthetic process          | 0.723064429   | 1            | 1      |
| biological_process | GO:0008219 | cell death                                      | 0.726531627   | 1            | 1      |
| biological_process | GO:0044085 | cellular component biogenesis                   | 0.747897987   | 1            | 1      |
| biological_process | GO:0044267 | cellular protein metabolic process              | 0.767112945   | 1            | 1      |
| biological_process | GO:0050877 | nervous system process                          | 0.770324023   | 1            | 1      |
| biological_process | GO:0007010 | cytoskeleton organization                       | 0.782810667   | 1            | 1      |
| biological_process | GO:0019538 | protein metabolic process                       | 0.788793063   | 1            | 1      |
| biological_process | GO:0006807 | nitrogen compound metabolic process             | 0.799448347   | 1            | 1      |
| biological_process | GO:0032501 | multicellular organismal process                | 0.80046482    | 1            | 1      |
| biological_process | GO:0003008 | system process                                  | 0.800835345   | 1            | 1      |
| biological_process | GO:0043933 | protein-containing complex subunit organization | 0.801849627   | 1            | 1      |
| biological_process | GO:0065003 | protein-containing complex assembly             | 0.801849627   | 1            | 1      |
| biological_process | GO:0009058 | biosynthetic process                            | 0.802577982   | 1            | 1      |
| biological_process | GO:0007275 | multicellular organism development              | 0.805360706   | 1            | 1      |
| biological_process | GO:0009790 | embryo development                              | 0.805360706   | 1            | 1      |
| biological_process | GO:0051276 | chromosome organization                         | 0.815066347   | 1            | 1      |
| biological_process | GO:0016192 | vesicle-mediated transport                      | 0.835657729   | 1            | 1      |
| biological_process | GO:1901564 | organonitrogen compound metabolic process       | 0.844964072   | 1            | 1      |
| biological_process | GO:0010467 | gene expression                                 | 0.897551836   | 1            | 1      |
| biological_process | GO:0008150 | biological_process                              | 1             | 1            | 1      |
| biological_process | GO:0071941 | nitrogen cycle metabolic process                | 1             | 1            | 1      |
| biological_process | GO:0032196 | transposition                                   | 1             | 1            | 1      |
| biological_process | GO:0007034 | vacuolar transport                              | 1             | 1            | 1      |
| biological_process | GO:0030198 | extracellular matrix organization               | 1             | 1            | 1      |
| biological_process | GO:0043062 | extracellular structure organization            | 1             | 1            | 1      |
| biological_process | GO:0003013 | circulatory system process                      | 1             | 1            | 1      |
| biological_process | GO:0019748 | secondary metabolic process                     | 1             | 1            | 1      |
| biological_process | GO:0030705 | cytoskeleton-dependent intracellular transport  | 1             | 1            | 1      |
| biological_process | GO:0051604 | protein maturation                              | 1             | 1            | 1      |
| biological_process | GO:0043473 | pigmentation                                    | 1             | 1            | 1      |
| biological_process | GO:0006457 | protein folding                                 | 1             | 1            | 1      |
| biological_process | GO:0006605 | protein targeting                               | 1             | 1            | 1      |

| ontology           | node_id    | node_name                                        | raw_p_overrep | FWER_overrep | qvalue |
|--------------------|------------|--------------------------------------------------|---------------|--------------|--------|
| biological_process | GO:0006886 | intracellular protein transport                  | 1             | 1            | 1      |
| biological_process | GO:0008104 | protein localization                             | 1             | 1            | 1      |
| biological_process | GO:0015031 | protein transport                                | 1             | 1            | 1      |
| biological_process | GO:0015833 | peptide transport                                | 1             | 1            | 1      |
| biological_process | GO:0033036 | macromolecule localization                       | 1             | 1            | 1      |
| biological_process | GO:0034613 | cellular protein localization                    | 1             | 1            | 1      |
| biological_process | GO:0042886 | amide transport                                  | 1             | 1            | 1      |
| biological_process | GO:0045184 | establishment of protein localization            | 1             | 1            | 1      |
| biological_process | GO:0070727 | cellular macromolecule localization              | 1             | 1            | 1      |
| biological_process | GO:0071702 | organic substance transport                      | 1             | 1            | 1      |
| biological_process | GO:0071705 | nitrogen compound transport                      | 1             | 1            | 1      |
| biological_process | GO:0022618 | ribonucleoprotein complex assembly               | 1             | 1            | 1      |
| biological_process | GO:0034622 | cellular protein-containing complex assembly     | 1             | 1            | 1      |
| biological_process | GO:0071826 | ribonucleoprotein complex subunit organization   | 1             | 1            | 1      |
| biological_process | GO:0006790 | sulfur compound metabolic process                | 1             | 1            | 1      |
| biological_process | GO:0006399 | tRNA metabolic process                           | 1             | 1            | 1      |
| biological_process | GO:0034660 | ncRNA metabolic process                          | 1             | 1            | 1      |
| biological_process | GO:0000280 | nuclear division                                 | 1             | 1            | 1      |
| biological_process | GO:0022402 | cell cycle process                               | 1             | 1            | 1      |
| biological_process | GO:0048285 | organelle fission                                | 1             | 1            | 1      |
| biological_process | GO:0140014 | mitotic nuclear division                         | 1             | 1            | 1      |
| biological_process | GO:1903047 | mitotic cell cycle process                       | 1             | 1            | 1      |
| biological_process | GO:0007059 | chromosome segregation                           | 1             | 1            | 1      |
| biological_process | GO:0019439 | aromatic compound catabolic process              | 1             | 1            | 1      |
| biological_process | GO:0034655 | nucleobase-containing compound catabolic process | 1             | 1            | 1      |
| biological_process | GO:0044270 | cellular nitrogen compound catabolic process     | 1             | 1            | 1      |
| biological_process | GO:0046700 | heterocycle catabolic process                    | 1             | 1            | 1      |
| biological_process | GO:1901361 | organic cyclic compound catabolic process        | 1             | 1            | 1      |
| biological_process | GO:1901575 | organic substance catabolic process              | 1             | 1            | 1      |
| biological_process | GO:0006396 | RNA processing                                   | 1             | 1            | 1      |
| biological_process | GO:0006397 | mRNA processing                                  | 1             | 1            | 1      |
| biological_process | GO:0016071 | mRNA metabolic process                           | 1             | 1            | 1      |
| biological_process | GO:0051301 | cell division                                    | 1             | 1            | 1      |
| biological_process | GO:0042254 | ribosome biogenesis                              | 1             | 1            | 1      |
| biological_process | GO:0022613 | ribonucleoprotein complex biogenesis             | 1             | 1            | 1      |
| biological_process | GO:0016070 | RNA metabolic process                            | 1             | 1            | 1      |
| biological_process | GO:0040007 | growth                                           | 1             | 1            | 1      |
| biological_process | GO:0000278 | mitotic cell cycle                               | 1             | 1            | 1      |

Table SI 12

## Gene family loss in Demodex

| ontology           | node_id    | node_name                                              | raw_p_overrep | FWER_overrep | qvalue      |
|--------------------|------------|--------------------------------------------------------|---------------|--------------|-------------|
| biological_process | GO:0071840 | <b>cellular component organization or biogenesis</b>   | 1.06E-05      | 0            | 0.001741165 |
| biological_process | GO:0009987 | <b>cellular process</b>                                | 0.001053662   | 0.042        | 0.064736089 |
| biological_process | GO:0022613 | <b>ribonucleoprotein complex biogenesis</b>            | 0.001349684   | 0.048        | 0.064736089 |
| biological_process | GO:0042254 | <b>ribosome biogenesis</b>                             | 0.001578929   | 0.06         | 0.064736089 |
| biological_process | GO:0044085 | <b>cellular component biogenesis</b>                   | 0.00245798    | 0.095        | 0.080621753 |
| biological_process | GO:0016043 | <b>cellular component organization</b>                 | 0.003418112   | 0.13         | 0.083263927 |
| biological_process | GO:0000902 | <b>cell morphogenesis</b>                              | 0.00604121    | 0.221        | 0.083263927 |
| biological_process | GO:0032989 | <b>cellular component morphogenesis</b>                | 0.00604121    | 0.221        | 0.083263927 |
| biological_process | GO:0006412 | <b>translation</b>                                     | 0.009646431   | 0.335        | 0.083263927 |
| biological_process | GO:0006518 | <b>peptide metabolic process</b>                       | 0.009646431   | 0.335        | 0.083263927 |
| biological_process | GO:0009059 | <b>macromolecule biosynthetic process</b>              | 0.009646431   | 0.335        | 0.083263927 |
| biological_process | GO:0034645 | <b>cellular macromolecule biosynthetic process</b>     | 0.009646431   | 0.335        | 0.083263927 |
| biological_process | GO:0043043 | <b>peptide biosynthetic process</b>                    | 0.009646431   | 0.335        | 0.083263927 |
| biological_process | GO:0043603 | <b>cellular amide metabolic process</b>                | 0.009646431   | 0.335        | 0.083263927 |
| biological_process | GO:0043604 | <b>amide biosynthetic process</b>                      | 0.009646431   | 0.335        | 0.083263927 |
| biological_process | GO:0044249 | <b>cellular biosynthetic process</b>                   | 0.009646431   | 0.335        | 0.083263927 |
| biological_process | GO:0044271 | <b>cellular nitrogen compound biosynthetic process</b> | 0.009646431   | 0.335        | 0.083263927 |
| biological_process | GO:1901566 | <b>organonitrogen compound biosynthetic process</b>    | 0.009646431   | 0.335        | 0.083263927 |
| biological_process | GO:1901576 | <b>organic substance biosynthetic process</b>          | 0.009646431   | 0.335        | 0.083263927 |
| biological_process | GO:0009058 | biosynthetic process                                   | 0.013939565   | 0.425        | 0.114304434 |
| biological_process | GO:0010467 | gene expression                                        | 0.014676231   | 0.456        | 0.114614376 |
| biological_process | GO:0008152 | metabolic process                                      | 0.024770389   | 0.609        | 0.179443035 |
| biological_process | GO:0006790 | sulfur compound metabolic process                      | 0.025165791   | 0.62         | 0.179443035 |
| biological_process | GO:1901564 | organonitrogen compound metabolic process              | 0.043934443   | 0.771        | 0.300218694 |
| biological_process | GO:0044281 | small molecule metabolic process                       | 0.053966828   | 0.816        | 0.354022393 |
| biological_process | GO:0006810 | transport                                              | 0.066392058   | 0.874        | 0.396157912 |
| biological_process | GO:0051234 | establishment of localization                          | 0.066392058   | 0.874        | 0.396157912 |
| biological_process | GO:0051186 | cofactor metabolic process                             | 0.069859781   | 0.891        | 0.396157912 |
| biological_process | GO:0051179 | localization                                           | 0.072176341   | 0.902        | 0.396157912 |
| biological_process | GO:0044238 | primary metabolic process                              | 0.074883508   | 0.911        | 0.396157912 |
| biological_process | GO:0071704 | organic substance metabolic process                    | 0.074883508   | 0.911        | 0.396157912 |
| biological_process | GO:0044267 | cellular protein metabolic process                     | 0.095434595   | 0.952        | 0.4891023   |
| biological_process | GO:0040011 | locomotion                                             | 0.103200534   | 0.965        | 0.512875382 |
| biological_process | GO:0009653 | anatomical structure morphogenesis                     | 0.12812015    | 0.984        | 0.574452123 |
| biological_process | GO:0007267 | cell-cell signaling                                    | 0.131590292   | 0.984        | 0.574452123 |
| biological_process | GO:0019538 | protein metabolic process                              | 0.135767357   | 0.985        | 0.574452123 |
| biological_process | GO:0006629 | lipid metabolic process                                | 0.152574468   | 0.992        | 0.574452123 |
| biological_process | GO:0022607 | cellular component assembly                            | 0.159648252   | 0.992        | 0.574452123 |
| biological_process | GO:0048869 | cellular developmental process                         | 0.168998263   | 0.993        | 0.574452123 |
| biological_process | GO:0003013 | circulatory system process                             | 0.17122575    | 0.995        | 0.574452123 |

| ontology           | node_id    | node_name                                       | raw_p_overrep | FWER_overrep | qvalue      |
|--------------------|------------|-------------------------------------------------|---------------|--------------|-------------|
| biological_process | GO:0005975 | carbohydrate metabolic process                  | 0.178265402   | 0.995        | 0.574452123 |
| biological_process | GO:0030154 | cell differentiation                            | 0.180783508   | 0.995        | 0.574452123 |
| biological_process | GO:0007010 | cytoskeleton organization                       | 0.190082851   | 0.995        | 0.574452123 |
| biological_process | GO:0044237 | cellular metabolic process                      | 0.19362453    | 0.995        | 0.574452123 |
| biological_process | GO:0006996 | organelle organization                          | 0.198360394   | 0.998        | 0.574452123 |
| biological_process | GO:0034330 | cell junction organization                      | 0.201938732   | 0.999        | 0.574452123 |
| biological_process | GO:0006807 | nitrogen compound metabolic process             | 0.203797937   | 0.999        | 0.574452123 |
| biological_process | GO:0006457 | protein folding                                 | 0.212263833   | 0.999        | 0.574452123 |
| biological_process | GO:0055085 | transmembrane transport                         | 0.224216734   | 0.999        | 0.574452123 |
| biological_process | GO:0006091 | generation of precursor metabolites and energy  | 0.228412211   | 0.999        | 0.574452123 |
| biological_process | GO:0006082 | organic acid metabolic process                  | 0.234093385   | 0.999        | 0.574452123 |
| biological_process | GO:0006520 | cellular amino acid metabolic process           | 0.234093385   | 0.999        | 0.574452123 |
| biological_process | GO:0019752 | carboxylic acid metabolic process               | 0.234093385   | 0.999        | 0.574452123 |
| biological_process | GO:0043436 | oxoacid metabolic process                       | 0.234093385   | 0.999        | 0.574452123 |
| biological_process | GO:0007155 | cell adhesion                                   | 0.234479675   | 0.999        | 0.574452123 |
| biological_process | GO:0022610 | biological adhesion                             | 0.234479675   | 0.999        | 0.574452123 |
| biological_process | GO:0006605 | protein targeting                               | 0.238187465   | 0.999        | 0.574452123 |
| biological_process | GO:0006886 | intracellular protein transport                 | 0.238187465   | 0.999        | 0.574452123 |
| biological_process | GO:0008104 | protein localization                            | 0.238187465   | 0.999        | 0.574452123 |
| biological_process | GO:0015031 | protein transport                               | 0.238187465   | 0.999        | 0.574452123 |
| biological_process | GO:0015833 | peptide transport                               | 0.238187465   | 0.999        | 0.574452123 |
| biological_process | GO:0033036 | macromolecule localization                      | 0.238187465   | 0.999        | 0.574452123 |
| biological_process | GO:0034613 | cellular protein localization                   | 0.238187465   | 0.999        | 0.574452123 |
| biological_process | GO:0042886 | amide transport                                 | 0.238187465   | 0.999        | 0.574452123 |
| biological_process | GO:0045184 | establishment of protein localization           | 0.238187465   | 0.999        | 0.574452123 |
| biological_process | GO:0070727 | cellular macromolecule localization             | 0.238187465   | 0.999        | 0.574452123 |
| biological_process | GO:0071702 | organic substance transport                     | 0.238187465   | 0.999        | 0.574452123 |
| biological_process | GO:0071705 | nitrogen compound transport                     | 0.238187465   | 0.999        | 0.574452123 |
| biological_process | GO:0032502 | developmental process                           | 0.25451468    | 1            | 0.604933443 |
| biological_process | GO:0048856 | anatomical structure development                | 0.276000911   | 1            | 0.646630705 |
| biological_process | GO:0034641 | cellular nitrogen compound metabolic process    | 0.299472113   | 1            | 0.691738401 |
| biological_process | GO:0040007 | growth                                          | 0.308640182   | 1            | 0.703013748 |
| biological_process | GO:0044260 | cellular macromolecule metabolic process        | 0.315591782   | 1            | 0.709000715 |
| biological_process | GO:0043170 | macromolecule metabolic process                 | 0.348286904   | 1            | 0.733597838 |
| biological_process | GO:0043933 | protein-containing complex subunit organization | 0.352569703   | 1            | 0.733597838 |
| biological_process | GO:0065003 | protein-containing complex assembly             | 0.352569703   | 1            | 0.733597838 |
| biological_process | GO:0006396 | RNA processing                                  | 0.359854261   | 1            | 0.733597838 |
| biological_process | GO:0006397 | mRNA processing                                 | 0.359854261   | 1            | 0.733597838 |
| biological_process | GO:0016071 | mRNA metabolic process                          | 0.359854261   | 1            | 0.733597838 |
| biological_process | GO:0061024 | membrane organization                           | 0.361092246   | 1            | 0.733597838 |
| biological_process | GO:0007568 | aging                                           | 0.363030875   | 1            | 0.733597838 |
| biological_process | GO:0071554 | cell wall organization or biogenesis            | 0.366798919   | 1            | 0.733597838 |
| biological_process | GO:0016192 | vesicle-mediated transport                      | 0.388735272   | 1            | 0.746392249 |
| biological_process | GO:0007154 | cell communication                              | 0.39152288    | 1            | 0.746392249 |

| ontology           | node_id    | node_name                                      | raw_p_overrep | FWER_overrep | qvalue      |
|--------------------|------------|------------------------------------------------|---------------|--------------|-------------|
| biological_process | GO:0023052 | signaling                                      | 0.39152288    | 1            | 0.746392249 |
| biological_process | GO:0006464 | cellular protein modification process          | 0.400503158   | 1            | 0.746392249 |
| biological_process | GO:0036211 | protein modification process                   | 0.400503158   | 1            | 0.746392249 |
| biological_process | GO:0043412 | macromolecule modification                     | 0.400503158   | 1            | 0.746392249 |
| biological_process | GO:0042592 | homeostatic process                            | 0.428903071   | 1            | 0.777220411 |
| biological_process | GO:0065008 | regulation of biological quality               | 0.428903071   | 1            | 0.777220411 |
| biological_process | GO:0030705 | cytoskeleton-dependent intracellular transport | 0.431262545   | 1            | 0.777220411 |
| biological_process | GO:0007275 | multicellular organism development             | 0.485004615   | 1            | 0.851787083 |
| biological_process | GO:0009790 | embryo development                             | 0.485004615   | 1            | 0.851787083 |
| biological_process | GO:0051604 | protein maturation                             | 0.511338541   | 1            | 0.851787083 |
| biological_process | GO:0022618 | ribonucleoprotein complex assembly             | 0.512766771   | 1            | 0.851787083 |
| biological_process | GO:0034622 | cellular protein-containing complex assembly   | 0.512766771   | 1            | 0.851787083 |
| biological_process | GO:0071826 | ribonucleoprotein complex subunit organization | 0.512766771   | 1            | 0.851787083 |
| biological_process | GO:0051276 | chromosome organization                        | 0.527423946   | 1            | 0.851787083 |
| biological_process | GO:0006914 | autophagy                                      | 0.528298514   | 1            | 0.851787083 |
| biological_process | GO:0061919 | process utilizing autophagic mechanism         | 0.528298514   | 1            | 0.851787083 |
| biological_process | GO:0006928 | movement of cell or subcellular component      | 0.534963839   | 1            | 0.851787083 |
| biological_process | GO:0048870 | cell motility                                  | 0.534963839   | 1            | 0.851787083 |
| biological_process | GO:0051674 | localization of cell                           | 0.534963839   | 1            | 0.851787083 |
| biological_process | GO:0051301 | cell division                                  | 0.556106096   | 1            | 0.876936537 |
| biological_process | GO:0006950 | response to stress                             | 0.616557136   | 1            | 0.924210792 |
| biological_process | GO:0065007 | biological regulation                          | 0.619234404   | 1            | 0.924210792 |
| biological_process | GO:0007034 | vacuolar transport                             | 0.620165163   | 1            | 0.924210792 |
| biological_process | GO:0046907 | intracellular transport                        | 0.622360589   | 1            | 0.924210792 |
| biological_process | GO:0051641 | cellular localization                          | 0.622360589   | 1            | 0.924210792 |
| biological_process | GO:0051649 | establishment of localization in cell          | 0.622360589   | 1            | 0.924210792 |
| biological_process | GO:0016070 | RNA metabolic process                          | 0.633448753   | 1            | 0.924210792 |
| biological_process | GO:0021700 | developmental maturation                       | 0.633665138   | 1            | 0.924210792 |
| biological_process | GO:0007005 | mitochondrion organization                     | 0.636803778   | 1            | 0.924210792 |
| biological_process | GO:0050896 | response to stimulus                           | 0.661702481   | 1            | 0.947510784 |
| biological_process | GO:0043473 | pigmentation                                   | 0.668893693   | 1            | 0.947510784 |
| biological_process | GO:0030198 | extracellular matrix organization              | 0.67596806    | 1            | 0.947510784 |
| biological_process | GO:0043062 | extracellular structure organization           | 0.67596806    | 1            | 0.947510784 |
| biological_process | GO:0007165 | signal transduction                            | 0.715783728   | 1            | 0.970153151 |
| biological_process | GO:0050789 | regulation of biological process               | 0.715783728   | 1            | 0.970153151 |
| biological_process | GO:0050794 | regulation of cellular process                 | 0.715783728   | 1            | 0.970153151 |
| biological_process | GO:0051716 | cellular response to stimulus                  | 0.715783728   | 1            | 0.970153151 |
| biological_process | GO:0006259 | DNA metabolic process                          | 0.803769892   | 1            | 1           |
| biological_process | GO:0090304 | nucleic acid metabolic process                 | 0.815500516   | 1            | 1           |
| biological_process | GO:0008219 | cell death                                     | 0.81918556    | 1            | 1           |
| biological_process | GO:0044403 | symbiont process                               | 0.825557148   | 1            | 1           |
| biological_process | GO:0044419 | interspecies interaction between organisms     | 0.825557148   | 1            | 1           |
| biological_process | GO:0051704 | multi-organism process                         | 0.825557148   | 1            | 1           |
| biological_process | GO:0000003 | reproduction                                   | 0.847166808   | 1            | 1           |



| ontology           | node_id    | node_name                                                | raw_p_overrep | FWER_overrep | qvalue |
|--------------------|------------|----------------------------------------------------------|---------------|--------------|--------|
| biological_process | GO:0032501 | multicellular organismal process                         | 0.85244846    | 1            | 1      |
| biological_process | GO:0002376 | immune system process                                    | 0.863456662   | 1            | 1      |
| biological_process | GO:0048646 | anatomical structure formation involved in morphogenesis | 0.904945927   | 1            | 1      |
| biological_process | GO:0007059 | chromosome segregation                                   | 0.912899052   | 1            | 1      |
| biological_process | GO:0009056 | catabolic process                                        | 0.928837298   | 1            | 1      |
| biological_process | GO:0006139 | nucleobase-containing compound metabolic process         | 0.946192676   | 1            | 1      |
| biological_process | GO:0006725 | cellular aromatic compound metabolic process             | 0.946192676   | 1            | 1      |
| biological_process | GO:0046483 | heterocycle metabolic process                            | 0.946192676   | 1            | 1      |
| biological_process | GO:1901360 | organic cyclic compound metabolic process                | 0.946192676   | 1            | 1      |
| biological_process | GO:0006399 | tRNA metabolic process                                   | 0.949763075   | 1            | 1      |
| biological_process | GO:0034660 | ncRNA metabolic process                                  | 0.949763075   | 1            | 1      |
| biological_process | GO:0007049 | cell cycle                                               | 0.964901836   | 1            | 1      |
| biological_process | GO:0044248 | cellular catabolic process                               | 0.971927658   | 1            | 1      |
| biological_process | GO:0003008 | system process                                           | 0.974387194   | 1            | 1      |
| biological_process | GO:0008283 | cell proliferation                                       | 0.990351413   | 1            | 1      |
| biological_process | GO:0000278 | mitotic cell cycle                                       | 0.996615052   | 1            | 1      |
| biological_process | GO:0050877 | nervous system process                                   | 0.998464955   | 1            | 1      |
| biological_process | GO:0008150 | biological_process                                       | 1             | 1            | 1      |
| biological_process | GO:0071941 | nitrogen cycle metabolic process                         | 1             | 1            | 1      |
| biological_process | GO:0032196 | transposition                                            | 1             | 1            | 1      |
| biological_process | GO:0007009 | plasma membrane organization                             | 1             | 1            | 1      |
| biological_process | GO:0010256 | endomembrane system organization                         | 1             | 1            | 1      |
| biological_process | GO:0019748 | secondary metabolic process                              | 1             | 1            | 1      |
| biological_process | GO:0006913 | nucleocytoplasmic transport                              | 1             | 1            | 1      |
| biological_process | GO:0051169 | nuclear transport                                        | 1             | 1            | 1      |
| biological_process | GO:0000280 | nuclear division                                         | 1             | 1            | 1      |
| biological_process | GO:0022402 | cell cycle process                                       | 1             | 1            | 1      |
| biological_process | GO:0048285 | organelle fission                                        | 1             | 1            | 1      |
| biological_process | GO:0140014 | mitotic nuclear division                                 | 1             | 1            | 1      |
| biological_process | GO:1903047 | mitotic cell cycle process                               | 1             | 1            | 1      |
| biological_process | GO:0019439 | aromatic compound catabolic process                      | 1             | 1            | 1      |
| biological_process | GO:0034655 | nucleobase-containing compound catabolic process         | 1             | 1            | 1      |
| biological_process | GO:0044270 | cellular nitrogen compound catabolic process             | 1             | 1            | 1      |
| biological_process | GO:0046700 | heterocycle catabolic process                            | 1             | 1            | 1      |
| biological_process | GO:1901361 | organic cyclic compound catabolic process                | 1             | 1            | 1      |
| biological_process | GO:1901575 | organic substance catabolic process                      | 1             | 1            | 1      |

Table SI 13

## Gene family loss in the Acariformes

| ontology           | node_id    | node_name                                        | raw_p_overrep | FWER_overrep | qvalue     |
|--------------------|------------|--------------------------------------------------|---------------|--------------|------------|
| biological_process | GO:0071941 | nitrogen cycle metabolic process                 | 0.004596994   | 0.19         | 0.38951373 |
| biological_process | GO:0006259 | DNA metabolic process                            | 0.011963106   | 0.411        | 0.38951373 |
| biological_process | GO:0044260 | cellular macromolecule metabolic process         | 0.012425921   | 0.42         | 0.38951373 |
| biological_process | GO:0006464 | cellular protein modification process            | 0.014250502   | 0.462        | 0.38951373 |
| biological_process | GO:0036211 | protein modification process                     | 0.014250502   | 0.462        | 0.38951373 |
| biological_process | GO:0043412 | macromolecule modification                       | 0.014250502   | 0.462        | 0.38951373 |
| biological_process | GO:0051276 | chromosome organization                          | 0.020695666   | 0.562        | 0.4848699  |
| biological_process | GO:0009987 | cellular process                                 | 0.026778698   | 0.643        | 0.52586716 |
| biological_process | GO:0043170 | macromolecule metabolic process                  | 0.028858564   | 0.671        | 0.52586716 |
| biological_process | GO:0044238 | primary metabolic process                        | 0.061039877   | 0.879        | 0.91004907 |
| biological_process | GO:0071704 | organic substance metabolic process              | 0.061039877   | 0.879        | 0.91004907 |
| biological_process | GO:0019538 | protein metabolic process                        | 0.082110029   | 0.943        | 0.94424454 |
| biological_process | GO:1901564 | organonitrogen compound metabolic process        | 0.099534568   | 0.963        | 0.94424454 |
| biological_process | GO:0044267 | cellular protein metabolic process               | 0.105159341   | 0.975        | 0.94424454 |
| biological_process | GO:0000280 | nuclear division                                 | 0.114319842   | 0.979        | 0.94424454 |
| biological_process | GO:0022402 | cell cycle process                               | 0.114319842   | 0.979        | 0.94424454 |
| biological_process | GO:0048285 | organelle fission                                | 0.114319842   | 0.979        | 0.94424454 |
| biological_process | GO:0140014 | mitotic nuclear division                         | 0.114319842   | 0.979        | 0.94424454 |
| biological_process | GO:1903047 | mitotic cell cycle process                       | 0.114319842   | 0.979        | 0.94424454 |
| biological_process | GO:0006807 | nitrogen compound metabolic process              | 0.119146254   | 0.987        | 0.94424454 |
| biological_process | GO:0007059 | chromosome segregation                           | 0.120909362   | 0.988        | 0.94424454 |
| biological_process | GO:0008152 | metabolic process                                | 0.183138471   | 0.997        | 1          |
| biological_process | GO:0044237 | cellular metabolic process                       | 0.270845193   | 1            | 1          |
| biological_process | GO:0009056 | catabolic process                                | 0.291524051   | 1            | 1          |
| biological_process | GO:0090304 | nucleic acid metabolic process                   | 0.304837486   | 1            | 1          |
| biological_process | GO:0022618 | ribonucleoprotein complex assembly               | 0.308203039   | 1            | 1          |
| biological_process | GO:0034622 | cellular protein-containing complex assembly     | 0.308203039   | 1            | 1          |
| biological_process | GO:0071826 | ribonucleoprotein complex subunit organization   | 0.308203039   | 1            | 1          |
| biological_process | GO:0006996 | organelle organization                           | 0.323962456   | 1            | 1          |
| biological_process | GO:0006139 | nucleobase-containing compound metabolic process | 0.32488387    | 1            | 1          |
| biological_process | GO:0006725 | cellular aromatic compound metabolic process     | 0.32488387    | 1            | 1          |
| biological_process | GO:0046483 | heterocycle metabolic process                    | 0.32488387    | 1            | 1          |
| biological_process | GO:1901360 | organic cyclic compound metabolic process        | 0.32488387    | 1            | 1          |
| biological_process | GO:0016043 | cellular component organization                  | 0.330666898   | 1            | 1          |
| biological_process | GO:0006790 | sulfur compound metabolic process                | 0.344946803   | 1            | 1          |
| biological_process | GO:0050896 | response to stimulus                             | 0.375493445   | 1            | 1          |
| biological_process | GO:0000278 | mitotic cell cycle                               | 0.390477332   | 1            | 1          |
| biological_process | GO:0007049 | cell cycle                                       | 0.390640683   | 1            | 1          |
| biological_process | GO:0071840 | cellular component organization or biogenesis    | 0.391468641   | 1            | 1          |
| biological_process | GO:0007009 | plasma membrane organization                     | 0.420109841   | 1            | 1          |

| ontology           | node_id    | node_name                                                | raw_p_overrep | FWER_overrep | qvalue |
|--------------------|------------|----------------------------------------------------------|---------------|--------------|--------|
| biological_process | GO:0010256 | endomembrane system organization                         | 0.420109841   | 1            | 1      |
| biological_process | GO:0007155 | cell adhesion                                            | 0.426379461   | 1            | 1      |
| biological_process | GO:0022610 | biological adhesion                                      | 0.426379461   | 1            | 1      |
| biological_process | GO:0006457 | protein folding                                          | 0.443671225   | 1            | 1      |
| biological_process | GO:0034330 | cell junction organization                               | 0.477563339   | 1            | 1      |
| biological_process | GO:0051604 | protein maturation                                       | 0.528783914   | 1            | 1      |
| biological_process | GO:0019439 | aromatic compound catabolic process                      | 0.543377088   | 1            | 1      |
| biological_process | GO:0034655 | nucleobase-containing compound catabolic process         | 0.543377088   | 1            | 1      |
| biological_process | GO:0044270 | cellular nitrogen compound catabolic process             | 0.543377088   | 1            | 1      |
| biological_process | GO:0046700 | heterocycle catabolic process                            | 0.543377088   | 1            | 1      |
| biological_process | GO:1901361 | organic cyclic compound catabolic process                | 0.543377088   | 1            | 1      |
| biological_process | GO:1901575 | organic substance catabolic process                      | 0.543377088   | 1            | 1      |
| biological_process | GO:0000902 | cell morphogenesis                                       | 0.544063053   | 1            | 1      |
| biological_process | GO:0032989 | cellular component morphogenesis                         | 0.544063053   | 1            | 1      |
| biological_process | GO:0016192 | vesicle-mediated transport                               | 0.551638793   | 1            | 1      |
| biological_process | GO:0065007 | biological regulation                                    | 0.570837378   | 1            | 1      |
| biological_process | GO:0002376 | immune system process                                    | 0.58218119    | 1            | 1      |
| biological_process | GO:0006950 | response to stress                                       | 0.600011394   | 1            | 1      |
| biological_process | GO:0022613 | ribonucleoprotein complex biogenesis                     | 0.611317973   | 1            | 1      |
| biological_process | GO:0008283 | cell proliferation                                       | 0.623329303   | 1            | 1      |
| biological_process | GO:0007034 | vacuolar transport                                       | 0.632202729   | 1            | 1      |
| biological_process | GO:0048646 | anatomical structure formation involved in morphogenesis | 0.645575671   | 1            | 1      |
| biological_process | GO:0044248 | cellular catabolic process                               | 0.646753605   | 1            | 1      |
| biological_process | GO:0007165 | signal transduction                                      | 0.654188707   | 1            | 1      |
| biological_process | GO:0050789 | regulation of biological process                         | 0.654188707   | 1            | 1      |
| biological_process | GO:0050794 | regulation of cellular process                           | 0.654188707   | 1            | 1      |
| biological_process | GO:0051716 | cellular response to stimulus                            | 0.654188707   | 1            | 1      |
| biological_process | GO:0009653 | anatomical structure morphogenesis                       | 0.673885968   | 1            | 1      |
| biological_process | GO:0007154 | cell communication                                       | 0.691186605   | 1            | 1      |
| biological_process | GO:0023052 | signaling                                                | 0.691186605   | 1            | 1      |
| biological_process | GO:0051186 | cofactor metabolic process                               | 0.729432783   | 1            | 1      |
| biological_process | GO:0006913 | nucleocytoplasmic transport                              | 0.735289987   | 1            | 1      |
| biological_process | GO:0051169 | nuclear transport                                        | 0.735289987   | 1            | 1      |
| biological_process | GO:0030154 | cell differentiation                                     | 0.735695164   | 1            | 1      |
| biological_process | GO:0008219 | cell death                                               | 0.739428246   | 1            | 1      |
| biological_process | GO:0043933 | protein-containing complex subunit organization          | 0.747869356   | 1            | 1      |
| biological_process | GO:0065003 | protein-containing complex assembly                      | 0.747869356   | 1            | 1      |
| biological_process | GO:0006914 | autophagy                                                | 0.755431047   | 1            | 1      |
| biological_process | GO:0061919 | process utilizing autophagic mechanism                   | 0.755431047   | 1            | 1      |
| biological_process | GO:0003013 | circulatory system process                               | 0.775346593   | 1            | 1      |
| biological_process | GO:0048869 | cellular developmental process                           | 0.778557326   | 1            | 1      |
| biological_process | GO:0042254 | ribosome biogenesis                                      | 0.782503945   | 1            | 1      |
| biological_process | GO:0007010 | cytoskeleton organization                                | 0.789624631   | 1            | 1      |

| ontology           | node_id    | node_name                                       | raw_p_overrep | FWER_overrep | qvalue |
|--------------------|------------|-------------------------------------------------|---------------|--------------|--------|
| biological_process | GO:0006399 | tRNA metabolic process                          | 0.811500514   | 1            | 1      |
| biological_process | GO:0034660 | ncRNA metabolic process                         | 0.811500514   | 1            | 1      |
| biological_process | GO:0042592 | homeostatic process                             | 0.825763053   | 1            | 1      |
| biological_process | GO:0065008 | regulation of biological quality                | 0.825763053   | 1            | 1      |
| biological_process | GO:0007568 | aging                                           | 0.826622932   | 1            | 1      |
| biological_process | GO:0021700 | developmental maturation                        | 0.829596269   | 1            | 1      |
| biological_process | GO:0007005 | mitochondrion organization                      | 0.831632086   | 1            | 1      |
| biological_process | GO:0040007 | growth                                          | 0.840847148   | 1            | 1      |
| biological_process | GO:0034641 | cellular nitrogen compound metabolic process    | 0.855455086   | 1            | 1      |
| biological_process | GO:0061024 | membrane organization                           | 0.883703358   | 1            | 1      |
| biological_process | GO:0022607 | cellular component assembly                     | 0.890133706   | 1            | 1      |
| biological_process | GO:0032502 | developmental process                           | 0.898877734   | 1            | 1      |
| biological_process | GO:0006810 | transport                                       | 0.905196188   | 1            | 1      |
| biological_process | GO:0051234 | establishment of localization                   | 0.905196188   | 1            | 1      |
| biological_process | GO:0003008 | system process                                  | 0.90769941    | 1            | 1      |
| biological_process | GO:0048856 | anatomical structure development                | 0.913257154   | 1            | 1      |
| biological_process | GO:0050877 | nervous system process                          | 0.917869581   | 1            | 1      |
| biological_process | GO:0005975 | carbohydrate metabolic process                  | 0.921327947   | 1            | 1      |
| biological_process | GO:0044085 | cellular component biogenesis                   | 0.921764357   | 1            | 1      |
| biological_process | GO:0000003 | reproduction                                    | 0.922863826   | 1            | 1      |
| biological_process | GO:0009058 | biosynthetic process                            | 0.925139377   | 1            | 1      |
| biological_process | GO:0006629 | lipid metabolic process                         | 0.949040387   | 1            | 1      |
| biological_process | GO:0040011 | locomotion                                      | 0.953150599   | 1            | 1      |
| biological_process | GO:0007267 | cell-cell signaling                             | 0.955444497   | 1            | 1      |
| biological_process | GO:0007275 | multicellular organism development              | 0.957872507   | 1            | 1      |
| biological_process | GO:0009790 | embryo development                              | 0.957872507   | 1            | 1      |
| biological_process | GO:0006412 | translation                                     | 0.962000821   | 1            | 1      |
| biological_process | GO:0006518 | peptide metabolic process                       | 0.962000821   | 1            | 1      |
| biological_process | GO:0009059 | macromolecule biosynthetic process              | 0.962000821   | 1            | 1      |
| biological_process | GO:0034645 | cellular macromolecule biosynthetic process     | 0.962000821   | 1            | 1      |
| biological_process | GO:0043043 | peptide biosynthetic process                    | 0.962000821   | 1            | 1      |
| biological_process | GO:0043603 | cellular amide metabolic process                | 0.962000821   | 1            | 1      |
| biological_process | GO:0043604 | amide biosynthetic process                      | 0.962000821   | 1            | 1      |
| biological_process | GO:0044249 | cellular biosynthetic process                   | 0.962000821   | 1            | 1      |
| biological_process | GO:0044271 | cellular nitrogen compound biosynthetic process | 0.962000821   | 1            | 1      |
| biological_process | GO:1901566 | organonitrogen compound biosynthetic process    | 0.962000821   | 1            | 1      |
| biological_process | GO:1901576 | organic substance biosynthetic process          | 0.962000821   | 1            | 1      |
| biological_process | GO:0051179 | localization                                    | 0.966860941   | 1            | 1      |
| biological_process | GO:0044281 | small molecule metabolic process                | 0.970255898   | 1            | 1      |
| biological_process | GO:0032501 | multicellular organismal process                | 0.975433312   | 1            | 1      |
| biological_process | GO:0006082 | organic acid metabolic process                  | 0.978816461   | 1            | 1      |
| biological_process | GO:0006520 | cellular amino acid metabolic process           | 0.978816461   | 1            | 1      |
| biological_process | GO:0019752 | carboxylic acid metabolic process               | 0.978816461   | 1            | 1      |
| biological_process | GO:0043436 | oxoacid metabolic process                       | 0.978816461   | 1            | 1      |

| ontology           | node_id    | node_name                                      | raw_p_overrep | FWER_overrep | qvalue |
|--------------------|------------|------------------------------------------------|---------------|--------------|--------|
| biological_process | GO:0051301 | cell division                                  | 0.986811841   | 1            | 1      |
| biological_process | GO:0046907 | intracellular transport                        | 0.991070368   | 1            | 1      |
| biological_process | GO:0051641 | cellular localization                          | 0.991070368   | 1            | 1      |
| biological_process | GO:0051649 | establishment of localization in cell          | 0.991070368   | 1            | 1      |
| biological_process | GO:0010467 | gene expression                                | 0.994152793   | 1            | 1      |
| biological_process | GO:0006928 | movement of cell or subcellular component      | 0.994270882   | 1            | 1      |
| biological_process | GO:0048870 | cell motility                                  | 0.994270882   | 1            | 1      |
| biological_process | GO:0051674 | localization of cell                           | 0.994270882   | 1            | 1      |
| biological_process | GO:0016070 | RNA metabolic process                          | 0.994305797   | 1            | 1      |
| biological_process | GO:0055085 | transmembrane transport                        | 0.99744064    | 1            | 1      |
| biological_process | GO:0006396 | RNA processing                                 | 0.997842852   | 1            | 1      |
| biological_process | GO:0006397 | mRNA processing                                | 0.997842852   | 1            | 1      |
| biological_process | GO:0016071 | mRNA metabolic process                         | 0.997842852   | 1            | 1      |
| biological_process | GO:0008150 | biological_process                             | 1             | 1            | 1      |
| biological_process | GO:0032196 | transposition                                  | 1             | 1            | 1      |
| biological_process | GO:0071554 | cell wall organization or biogenesis           | 1             | 1            | 1      |
| biological_process | GO:0030198 | extracellular matrix organization              | 1             | 1            | 1      |
| biological_process | GO:0043062 | extracellular structure organization           | 1             | 1            | 1      |
| biological_process | GO:0019748 | secondary metabolic process                    | 1             | 1            | 1      |
| biological_process | GO:0030705 | cytoskeleton-dependent intracellular transport | 1             | 1            | 1      |
| biological_process | GO:0044403 | symbiont process                               | 1             | 1            | 1      |
| biological_process | GO:0044419 | interspecies interaction between organisms     | 1             | 1            | 1      |
| biological_process | GO:0051704 | multi-organism process                         | 1             | 1            | 1      |
| biological_process | GO:0043473 | pigmentation                                   | 1             | 1            | 1      |
| biological_process | GO:0006605 | protein targeting                              | 1             | 1            | 1      |
| biological_process | GO:0006886 | intracellular protein transport                | 1             | 1            | 1      |
| biological_process | GO:0008104 | protein localization                           | 1             | 1            | 1      |
| biological_process | GO:0015031 | protein transport                              | 1             | 1            | 1      |
| biological_process | GO:0015833 | peptide transport                              | 1             | 1            | 1      |
| biological_process | GO:0033036 | macromolecule localization                     | 1             | 1            | 1      |
| biological_process | GO:0034613 | cellular protein localization                  | 1             | 1            | 1      |
| biological_process | GO:0042886 | amide transport                                | 1             | 1            | 1      |
| biological_process | GO:0045184 | establishment of protein localization          | 1             | 1            | 1      |
| biological_process | GO:0070727 | cellular macromolecule localization            | 1             | 1            | 1      |
| biological_process | GO:0071702 | organic substance transport                    | 1             | 1            | 1      |
| biological_process | GO:0071705 | nitrogen compound transport                    | 1             | 1            | 1      |
| biological_process | GO:0006091 | generation of precursor metabolites and energy | 1             | 1            | 1      |

**Table SI 14**

**RELAX test significant orthogroups**

| Orthogroup | No. codons | omega spiders/scorpions | omega Acariformes | RELAX null log-likelihood | RELAX alternative log-likelihood | RELAX K parameter | p-value  | SGoF adjusted p-value |
|------------|------------|-------------------------|-------------------|---------------------------|----------------------------------|-------------------|----------|-----------------------|
| OG0002034  | 428        | 0.017                   | 0.1167            | -13259.34                 | -13249.87                        | 0.2               | 0        | 0.0016                |
| OG0002407  | 218        | 0.0119                  | 0.015             | -4187.74                  | -4161.53                         | 7.06              | 0        | 0.0016                |
| OG0003444  | 788        | 0.0052                  | 0.0085            | -17427.94                 | -17419.58                        | 0.61              | 0        | 0.0016                |
| OG0004159  | 314        | 0.0217                  | 0.0095            | -7561.59                  | -7552.82                         | 1.06              | 0        | 0.0016                |
| OG0004254  | 309        | 0.0098                  | 0.0539            | -6969.44                  | -6958                            | 0.18              | 0        | 0.0016                |
| OG0004266  | 327        | 0.0478                  | 0.0565            | -8694.06                  | -8572.65                         | 0.83              | 0        | 0.0016                |
| OG0004288  | 430        | 0.0156                  | 0.0136            | -11033.26                 | -11003.13                        | 1.04              | 0        | 0.0016                |
| OG0004689  | 1081       | 0.0076                  | 0.0264            | -24156.75                 | -24139.02                        | 0.23              | 0        | 0.0016                |
| OG0004728  | 321        | 0.0376                  | 0.0319            | -10692.35                 | -10594.26                        | 0.8               | 0        | 0.0016                |
| OG0005109  | 377        | 0.0114                  | 0.0363            | -15384.38                 | -15147.02                        | 0.94              | 0        | 0.0016                |
| OG0005307  | 424        | 0.034                   | 0.0499            | -12364.88                 | -12345.49                        | 0.89              | 0        | 0.0016                |
| OG0005333  | 150        | 0.0519                  | 0.0095            | -4480.29                  | -4466                            | 0.95              | 0        | 0.0016                |
| OG0005379  | 2046       | 0.0029                  | 0.0133            | -43386.9                  | -43362.39                        | 0.12              | 0        | 0.0016                |
| OG0005399  | 1044       | 0.0065                  | 0.0348            | -24099.55                 | -24072.93                        | 0.59              | 0        | 0.0016                |
| OG0005576  | 215        | 0.029                   | 0.0378            | -5198.53                  | -5185.13                         | 1.3               | 0        | 0.0016                |
| OG0004832  | 286        | 4.00E-04                | 0.0163            | -6682.25                  | -6674.83                         | 0.28              | 1.00E-04 | 0.0022                |
| OG0004978  | 351        | 0.0153                  | 0.0332            | -9854.15                  | -9846.65                         | 0.19              | 1.00E-04 | 0.0022                |
| OG0005329  | 277        | 0.0081                  | 0.0449            | -6422.48                  | -6414.41                         | 0.33              | 1.00E-04 | 0.0022                |
| OG0003260  | 167        | 0.0171                  | 0.0631            | -6243.69                  | -6236.97                         | 0.98              | 2.00E-04 | 0.0027                |
| OG0005149  | 142        | 0.0018                  | 0.0399            | -3207.27                  | -3200.3                          | 0.11              | 2.00E-04 | 0.0027                |
| OG0005207  | 453        | 0.0036                  | 0.0367            | -13138.53                 | -13132.09                        | 0.26              | 3.00E-04 | 0.0029                |
| OG0004223  | 567        | 0.0572                  | 0.0851            | -17248.81                 | -17242.59                        | 0.57              | 4.00E-04 | 0.003                 |
| OG0005045  | 188        | 0.0221                  | 0.0989            | -6137.99                  | -6132.18                         | 0.37              | 6.00E-04 | 0.0038                |
| OG0005391  | 371        | 0.0113                  | 0.0463            | -9145.95                  | -9140.01                         | 0.17              | 6.00E-04 | 0.0038                |
| OG0005680  | 88         | 0.0546                  | 0.1453            | -3014.85                  | -3009.11                         | 0.27              | 7.00E-04 | 0.0041                |

| Orthogroup | No. codons | omega spiders/scorpions | omega Acariformes | RELAX null log-likelihood | RELAX alternative log-likelihood | RELAX K parameter | p-value  | SGoF adjusted p-value |
|------------|------------|-------------------------|-------------------|---------------------------|----------------------------------|-------------------|----------|-----------------------|
| OG0002809  | 149        | 0                       | 0.0366            | -2594.95                  | -2589.38                         | 0.3               | 8.00E-04 | 0.0046                |
| OG0004780  | 100        | 0.0925                  | 0.0369            | -3582.18                  | -3576.68                         | 7.82              | 9.00E-04 | 0.0046                |
| OG0004758  | 330        | 0.0271                  | 0.0695            | -10269.7                  | -10264.39                        | 0.42              | 0.0011   | 0.0054                |
| OG0006117  | 163        | 0.044                   | 0.109             | -5221.8                   | -5216.49                         | 0.35              | 0.0011   | 0.0054                |
| OG0005638  | 350        | 0.0402                  | 0.0956            | -12133.98                 | -12128.93                        | 0.51              | 0.0015   | 0.006                 |
| OG0004759  | 259        | 0.0396                  | 0.1112            | -8633.59                  | -8628.62                         | 0.28              | 0.0016   | 0.0061                |
| OG0003950  | 61         | 0.0153                  | 0.0751            | -1353.06                  | -1348.12                         | 0                 | 0.0017   | 0.0062                |
| OG0004588  | 469        | 0.0436                  | 0.0713            | -15374.31                 | -15369.55                        | 0.49              | 0.002    | 0.007                 |
| OG0005213  | 561        | 0.0107                  | 0.0281            | -14909.26                 | -14904.47                        | 0.53              | 0.002    | 0.007                 |
| OG0004162  | 173        | 0.041                   | 0.0341            | -5110.09                  | -5105.41                         | 0.87              | 0.0022   | 0.008                 |
| OG0004440  | 412        | 0.0638                  | 0.0198            | -14186.21                 | -14181.71                        | 1.39              | 0.0027   | 0.0093                |
| OG0005766  | 134        | 0.0053                  | 0.0516            | -2915.81                  | -2911.31                         | 0.59              | 0.0027   | 0.0093                |
| OG0004091  | 192        | 0.3278                  | 0.0372            | -7325.68                  | -7321.24                         | 1.71              | 0.0029   | 0.0096                |
| OG0004892  | 224        | 0.0147                  | 0.0782            | -6261.06                  | -6256.67                         | 0.3               | 0.003    | 0.01                  |
| OG0003839  | 391        | 0.0372                  | 0.0207            | -10347.54                 | -10343.18                        | 1.56              | 0.0031   | 0.01                  |
| OG0005016  | 407        | 0.0576                  | 0.0659            | -12817.98                 | -12813.72                        | 0.52              | 0.0035   | 0.0101                |
| OG0005234  | 190        | 0.0108                  | 0.0426            | -4713.81                  | -4709.62                         | 0.07              | 0.0038   | 0.0115                |
| OG0004861  | 364        | 0.0607                  | 0.0299            | -13706.89                 | -13702.76                        | 1.62              | 0.0041   | 0.0115                |
| OG0004043  | 415        | 0.0643                  | 0.1034            | -11885.11                 | -11881.08                        | 0.44              | 0.0046   | 0.0126                |
| OG0004413  | 334        | 0.019                   | 0.0313            | -9566.34                  | -9562.33                         | 0.56              | 0.0046   | 0.0126                |
| OG0004641  | 233        | 0.0499                  | 0.0169            | -7040.75                  | -7036.74                         | 1.98              | 0.0046   | 0.0126                |
| OG0005182  | 271        | 0.0313                  | 0.0954            | -8352.15                  | -8348.24                         | 0.09              | 0.0051   | 0.0137                |
| OG0004547  | 172        | 0.016                   | 0.029             | -3908.68                  | -3904.81                         | 0.9               | 0.0054   | 0.014                 |
| OG0002024  | 654        | 0.0375                  | 0.0088            | -16432.61                 | -16428.84                        | 1.33              | 0.006    | 0.0169                |
| OG0003505  | 467        | 0.0166                  | 0.0419            | -10210.75                 | -10206.99                        | 0.82              | 0.0061   | 0.0193                |
| OG0005256  | 1094       | 0.0251                  | 0.0353            | -31883                    | -31879.26                        | 0.57              | 0.0062   | 0.0204                |
| OG0004635  | 476        | 0.0542                  | 0.0117            | -16775.59                 | -16771.94                        | 1.62              | 0.0069   | 0.0206                |
| OG0004378  | 173        | 0.0256                  | 0.1063            | -4524.58                  | -4520.95                         | 0                 | 0.007    | 0.022                 |

| Orthogroup | No. codons | omega spiders/scorpions | omega Acariformes | RELAX null log-likelihood | RELAX alternative log-likelihood | RELAX K parameter | p-value | SGoF adjusted p-value |
|------------|------------|-------------------------|-------------------|---------------------------|----------------------------------|-------------------|---------|-----------------------|
| OG0005676  | 179        | 0.0098                  | 0.1094            | -6101.36                  | -6097.73                         | 0.58              | 0.007   | 0.022                 |
| OG0005186  | 378        | 0.0495                  | 0.044             | -15037.93                 | -15034.41                        | 1.45              | 0.008   | 0.0223                |
| OG0004017  | 291        | 0.0229                  | 0.0677            | -7364.79                  | -7361.34                         | 0.76              | 0.0086  | 0.0224                |
| OG0004305  | 429        | 0.1203                  | 0.0438            | -14437.74                 | -14434.36                        | 2.42              | 0.0093  | 0.0239                |
| OG0003924  | 506        | 0.0206                  | 0.0127            | -12512.16                 | -12508.78                        | 0.98              | 0.0094  | 0.026                 |
| OG0004300  | 145        | 0.0135                  | 0.0217            | -3740.42                  | -3737.07                         | 0.61              | 0.0096  | 0.0265                |
| OG0004837  | 313        | 0.0399                  | 0.0669            | -8870.3                   | -8866.98                         | 0.19              | 0.01    | 0.0265                |
| OG0005898  | 552        | 0.0138                  | 0.0324            | -13351.42                 | -13348.1                         | 0.84              | 0.01    | 0.0265                |
| OG0005894  | 470        | 0.0199                  | 0.0275            | -15476.05                 | -15472.74                        | 0.26              | 0.0101  | 0.0272                |
| OG0005904  | 74         | 0.0989                  | 0.0082            | -2537.15                  | -2533.92                         | 3.2               | 0.011   | 0.0272                |
| OG0005073  | 311        | 0.023                   | 0.0559            | -9021.01                  | -9017.82                         | 0.35              | 0.0115  | 0.0367                |
| OG0005740  | 275        | 0.0309                  | 0.017             | -8375.01                  | -8371.81                         | 0.49              | 0.0115  | 0.0367                |
| OG0004516  | 162        | 0.005                   | 0.0309            | -4862.79                  | -4859.65                         | 0.62              | 0.0121  | 0.0426                |
| OG0006208  | 300        | 0.0523                  | 0.0107            | -9970.54                  | -9967.39                         | 1.99              | 0.0121  | 0.0426                |
| OG0005140  | 95         | 0.0108                  | 0.02              | -2004.77                  | -2001.65                         | 0.12              | 0.0126  | 0.0438                |
| OG0005335  | 306        | 0.0245                  | 0.0602            | -10288.85                 | -10285.77                        | 0.3               | 0.0131  | 0.0446                |
| OG0002859  | 541        | 0.0375                  | 0.0728            | -15211.26                 | -15208.22                        | 0.55              | 0.0137  | 0.0455                |
| OG0004385  | 151        | 0.0016                  | 0.0375            | -3452.5                   | -3449.48                         | 0.27              | 0.014   | 0.0458                |
| OG0004517  | 206        | 0.0083                  | 0.0263            | -4885.33                  | -4882.48                         | 0.51              | 0.0168  | 0.0458                |
| OG0004679  | 254        | 0.0069                  | 0.038             | -6848.1                   | -6845.25                         | 0.3               | 0.0169  | 0.0469                |
| OG0003752  | 407        | 0.0146                  | 0.0258            | -11245.13                 | -11242.37                        | 0.67              | 0.0187  | 0.0483                |
| OG0004023  | 272        | 0.0524                  | 0.0115            | -8241.39                  | -8238.66                         | 1.55              | 0.0193  | 0.0552                |
| OG0004820  | 176        | 0.0043                  | 0.0151            | -4046.9                   | -4044.21                         | 0.55              | 0.0204  | 0.0559                |
| OG0004904  | 348        | 0.0281                  | 0.0191            | -12900.59                 | -12897.91                        | 1.58              | 0.0206  | 0.0575                |
| OG0004476  | 161        | 0.0071                  | 0.0348            | -4747.48                  | -4744.8                          | 0.41              | 0.0207  | 0.0579                |
| OG0003594  | 266        | 0.0663                  | 0.0509            | -8150.71                  | -8148.05                         | 1.56              | 0.021   | 0.059                 |
| OG0005293  | 303        | 0.033                   | 0.0475            | -9740.18                  | -9737.55                         | 0.48              | 0.022   | 0.0598                |
| OG0003623  | 429        | 0.0359                  | 0.0605            | -12515.04                 | -12512.43                        | 0.39              | 0.0223  | 0.06                  |



| Orthogroup | No. codons | omega spiders/scorpions | omega Acariformes | RELAX null log-likelihood | RELAX alternative log-likelihood | RELAX K parameter | p-value | SGoF adjusted p-value |
|------------|------------|-------------------------|-------------------|---------------------------|----------------------------------|-------------------|---------|-----------------------|
| OG0004344  | 251        | 0.0421                  | 0.0642            | -7706.79                  | -7704.18                         | 0.49              | 0.0224  | 0.0624                |
| OG0004032  | 166        | 0.0092                  | 0.0205            | -4373.66                  | -4371.09                         | 0.69              | 0.0236  | 0.0644                |
| OG0005080  | 222        | 0.0971                  | 0.0548            | -7666.12                  | -7663.57                         | 1.85              | 0.0239  | 0.0644                |
| OG0004875  | 203        | 0.0467                  | 0.0296            | -7117.15                  | -7114.64                         | 1.02              | 0.025   | 0.0646                |
| OG0003328  | 303        | 0.0065                  | 0.0332            | -8417.42                  | -8414.94                         | 0.59              | 0.026   | 0.0667                |
| OG0004207  | 308        | 0.0287                  | 0.0554            | -8614.88                  | -8612.42                         | 0.43              | 0.0265  | 0.0738                |
| OG0004610  | 160        | 0.0321                  | 0.0148            | -4714.14                  | -4711.68                         | 1.67              | 0.0265  | 0.0738                |
| OG0005091  | 665        | 0.0296                  | 0.0478            | -22186.84                 | -22184.38                        | 0.67              | 0.0265  | 0.0738                |
| OG0005220  | 82         | 0.008                   | 0.0286            | -1989.11                  | -1986.66                         | 0.64              | 0.0271  | 0.074                 |
| OG0004808  | 202        | 0.0258                  | 0.0211            | -7541.21                  | -7538.77                         | 0.92              | 0.0272  | 0.0767                |
| OG0005302  | 162        | 0.0482                  | 0.1364            | -5435.11                  | -5432.73                         | 0.5               | 0.029   | 0.0771                |
| OG0004568  | 240        | 0.0519                  | 0.0126            | -8080.54                  | -8078.22                         | 1.44              | 0.0312  | 0.0771                |
| OG0004646  | 194        | 0.0316                  | 0.0657            | -5612.66                  | -5610.42                         | 0.52              | 0.0342  | 0.0775                |
| OG0003453  | 555        | 0.0226                  | 0.0461            | -16930.38                 | -16928.17                        | 0.52              | 0.0355  | 0.078                 |
| OG0003205  | 609        | 0.0134                  | 0.0319            | -13237.18                 | -13234.98                        | 0.73              | 0.0358  | 0.0822                |
| OG0004080  | 248        | 0.0265                  | 0.068             | -8774.73                  | -8772.55                         | 0.53              | 0.0367  | 0.083                 |
| OG0005101  | 231        | 0.0483                  | 0.0253            | -8426.44                  | -8424.26                         | 1.35              | 0.0372  | 0.0848                |

Table SI 15

## Relaxed selection enrichment

| ontology           | node_id    | node_name                                                   | raw_p_overrep | FWER_<br>overrep | qvalue      |
|--------------------|------------|-------------------------------------------------------------|---------------|------------------|-------------|
| biological_process | GO:0006396 | <b>RNA processing</b>                                       | 0.000296311   | 0.008            | 0.009493355 |
| biological_process | GO:0006397 | <b>mRNA processing</b>                                      | 0.000296311   | 0.008            | 0.009493355 |
| biological_process | GO:0016071 | <b>mRNA metabolic process</b>                               | 0.000296311   | 0.008            | 0.009493355 |
| biological_process | GO:0006464 | <b>cellular protein modification process</b>                | 0.00035379    | 0.012            | 0.009493355 |
| biological_process | GO:0036211 | <b>protein modification process</b>                         | 0.00035379    | 0.012            | 0.009493355 |
| biological_process | GO:0043412 | <b>macromolecule modification</b>                           | 0.00035379    | 0.012            | 0.009493355 |
| biological_process | GO:0044238 | <b>primary metabolic process</b>                            | 0.001296222   | 0.058            | 0.024522172 |
| biological_process | GO:0071704 | <b>organic substance metabolic process</b>                  | 0.001296222   | 0.058            | 0.024522172 |
| biological_process | GO:0016070 | <b>RNA metabolic process</b>                                | 0.00183788    | 0.076            | 0.024522172 |
| biological_process | GO:0006139 | <b>nucleobase-containing compound<br/>metabolic process</b> | 0.001980051   | 0.083            | 0.024522172 |
| biological_process | GO:0006725 | <b>cellular aromatic compound<br/>metabolic process</b>     | 0.001980051   | 0.083            | 0.024522172 |
| biological_process | GO:0046483 | <b>heterocycle metabolic process</b>                        | 0.001980051   | 0.083            | 0.024522172 |
| biological_process | GO:1901360 | <b>organic cyclic compound metabolic<br/>process</b>        | 0.001980051   | 0.083            | 0.024522172 |
| biological_process | GO:0043170 | <b>macromolecule metabolic process</b>                      | 0.003465608   | 0.143            | 0.039754306 |
| biological_process | GO:0090304 | <b>nucleic acid metabolic process</b>                       | 0.003703817   | 0.173            | 0.039754306 |
| biological_process | GO:1901564 | <b>organonitrogen compound metabolic<br/>process</b>        | 0.007359904   | 0.26             | 0.074059033 |
| biological_process | GO:0006082 | <b>organic acid metabolic process</b>                       | 0.010752663   | 0.332            | 0.08655894  |
| biological_process | GO:0006520 | <b>cellular amino acid metabolic process</b>                | 0.010752663   | 0.332            | 0.08655894  |
| biological_process | GO:0019752 | <b>carboxylic acid metabolic process</b>                    | 0.010752663   | 0.332            | 0.08655894  |
| biological_process | GO:0043436 | <b>oxoacid metabolic process</b>                            | 0.010752663   | 0.332            | 0.08655894  |
| biological_process | GO:0044267 | <b>cellular protein metabolic process</b>                   | 0.012801893   | 0.36             | 0.098147845 |
| biological_process | GO:0044237 | cellular metabolic process                                  | 0.020337019   | 0.528            | 0.144624503 |
| biological_process | GO:0006807 | nitrogen compound metabolic process                         | 0.020660643   | 0.529            | 0.144624503 |
| biological_process | GO:0019538 | protein metabolic process                                   | 0.024635519   | 0.555            | 0.16526327  |
| biological_process | GO:0008152 | metabolic process                                           | 0.040286324   | 0.76             | 0.259443924 |
| biological_process | GO:0044260 | cellular macromolecule metabolic<br>process                 | 0.048049138   | 0.807            | 0.297535048 |
| biological_process | GO:0032502 | developmental process                                       | 0.06846904    | 0.896            | 0.408278352 |
| biological_process | GO:0010467 | gene expression                                             | 0.083934988   | 0.932            | 0.482626179 |
| biological_process | GO:0048856 | anatomical structure development                            | 0.094648458   | 0.943            | 0.507946725 |
| biological_process | GO:0050896 | response to stimulus                                        | 0.094648458   | 0.943            | 0.507946725 |
| biological_process | GO:0019439 | aromatic compound catabolic process                         | 0.121575745   | 0.98             | 0.518187958 |
| biological_process | GO:0034655 | nucleobase-containing compound<br>catabolic process         | 0.121575745   | 0.98             | 0.518187958 |
| biological_process | GO:0044270 | cellular nitrogen compound catabolic<br>process             | 0.121575745   | 0.98             | 0.518187958 |
| biological_process | GO:0046700 | heterocycle catabolic process                               | 0.121575745   | 0.98             | 0.518187958 |
| biological_process | GO:1901361 | organic cyclic compound catabolic<br>process                | 0.121575745   | 0.98             | 0.518187958 |
| biological_process | GO:1901575 | organic substance catabolic process                         | 0.121575745   | 0.98             | 0.518187958 |
| biological_process | GO:0007154 | cell communication                                          | 0.12264475    | 0.98             | 0.518187958 |
| biological_process | GO:0023052 | signaling                                                   | 0.12264475    | 0.98             | 0.518187958 |
| biological_process | GO:0046907 | intracellular transport                                     | 0.132893482   | 0.986            | 0.518187958 |
| biological_process | GO:0051641 | cellular localization                                       | 0.132893482   | 0.986            | 0.518187958 |

| ontology           | node_id    | node_name                                       | raw_p_overrep | FWER_<br>overrep | qvalue      |
|--------------------|------------|-------------------------------------------------|---------------|------------------|-------------|
| biological_process | GO:0051649 | establishment of localization in cell           | 0.132893482   | 0.986            | 0.518187958 |
| biological_process | GO:0003008 | system process                                  | 0.138398026   | 0.989            | 0.518187958 |
| biological_process | GO:0050877 | nervous system process                          | 0.138398026   | 0.989            | 0.518187958 |
| biological_process | GO:0003013 | circulatory system process                      | 0.16          | 0.996            | 0.51995079  |
| biological_process | GO:0006629 | lipid metabolic process                         | 0.168673263   | 0.996            | 0.51995079  |
| biological_process | GO:0007165 | signal transduction                             | 0.169675612   | 0.996            | 0.51995079  |
| biological_process | GO:0022607 | cellular component assembly                     | 0.169675612   | 0.996            | 0.51995079  |
| biological_process | GO:0050789 | regulation of biological process                | 0.169675612   | 0.996            | 0.51995079  |
| biological_process | GO:0050794 | regulation of cellular process                  | 0.169675612   | 0.996            | 0.51995079  |
| biological_process | GO:0051716 | cellular response to stimulus                   | 0.169675612   | 0.996            | 0.51995079  |
| biological_process | GO:0007267 | cell-cell signaling                             | 0.169762992   | 0.996            | 0.51995079  |
| biological_process | GO:0006913 | nucleocytoplasmic transport                     | 0.171163925   | 0.996            | 0.51995079  |
| biological_process | GO:0051169 | nuclear transport                               | 0.171163925   | 0.996            | 0.51995079  |
| biological_process | GO:0009056 | catabolic process                               | 0.208281416   | 0.998            | 0.617204168 |
| biological_process | GO:0009987 | cellular process                                | 0.218865963   | 0.999            | 0.617204168 |
| biological_process | GO:0022618 | ribonucleoprotein complex assembly              | 0.222346843   | 0.999            | 0.617204168 |
| biological_process | GO:0034622 | cellular protein-containing complex assembly    | 0.222346843   | 0.999            | 0.617204168 |
| biological_process | GO:0071826 | ribonucleoprotein complex subunit organization  | 0.222346843   | 0.999            | 0.617204168 |
| biological_process | GO:0006950 | response to stress                              | 0.229712924   | 0.999            | 0.626843742 |
| biological_process | GO:0006259 | DNA metabolic process                           | 0.24781934    | 1                | 0.664981896 |
| biological_process | GO:0032196 | transposition                                   | 0.294699332   | 1                | 0.690037679 |
| biological_process | GO:0021700 | developmental maturation                        | 0.298026763   | 1                | 0.690037679 |
| biological_process | GO:0008219 | cell death                                      | 0.311665952   | 1                | 0.690037679 |
| biological_process | GO:0006605 | protein targeting                               | 0.321446124   | 1                | 0.690037679 |
| biological_process | GO:0006886 | intracellular protein transport                 | 0.321446124   | 1                | 0.690037679 |
| biological_process | GO:0008104 | protein localization                            | 0.321446124   | 1                | 0.690037679 |
| biological_process | GO:0015031 | protein transport                               | 0.321446124   | 1                | 0.690037679 |
| biological_process | GO:0015833 | peptide transport                               | 0.321446124   | 1                | 0.690037679 |
| biological_process | GO:0033036 | macromolecule localization                      | 0.321446124   | 1                | 0.690037679 |
| biological_process | GO:0034613 | cellular protein localization                   | 0.321446124   | 1                | 0.690037679 |
| biological_process | GO:0042886 | amide transport                                 | 0.321446124   | 1                | 0.690037679 |
| biological_process | GO:0045184 | establishment of protein localization           | 0.321446124   | 1                | 0.690037679 |
| biological_process | GO:0070727 | cellular macromolecule localization             | 0.321446124   | 1                | 0.690037679 |
| biological_process | GO:0071702 | organic substance transport                     | 0.321446124   | 1                | 0.690037679 |
| biological_process | GO:0071705 | nitrogen compound transport                     | 0.321446124   | 1                | 0.690037679 |
| biological_process | GO:0007010 | cytoskeleton organization                       | 0.342899315   | 1                | 0.704966797 |
| biological_process | GO:0006928 | movement of cell or subcellular component       | 0.345915385   | 1                | 0.704966797 |
| biological_process | GO:0048870 | cell motility                                   | 0.345915385   | 1                | 0.704966797 |
| biological_process | GO:0051674 | localization of cell                            | 0.345915385   | 1                | 0.704966797 |
| biological_process | GO:0016043 | cellular component organization                 | 0.37086114    | 1                | 0.735241846 |
| biological_process | GO:0044248 | cellular catabolic process                      | 0.378971723   | 1                | 0.735241846 |
| biological_process | GO:0043933 | protein-containing complex subunit organization | 0.379037722   | 1                | 0.735241846 |
| biological_process | GO:0065003 | protein-containing complex assembly             | 0.379037722   | 1                | 0.735241846 |
| biological_process | GO:0034330 | cell junction organization                      | 0.408051225   | 1                | 0.779464522 |

| ontology           | node_id    | node_name                                      | raw_p_overrep | FWER_<br>overrep | qvalue      |
|--------------------|------------|------------------------------------------------|---------------|------------------|-------------|
| biological_process | GO:0065007 | biological regulation                          | 0.411518536   | 1                | 0.779464522 |
| biological_process | GO:0030154 | cell differentiation                           | 0.431082164   | 1                | 0.807025911 |
| biological_process | GO:0044281 | small molecule metabolic process               | 0.454207348   | 1                | 0.840544633 |
| biological_process | GO:0002376 | immune system process                          | 0.47947758    | 1                | 0.855877206 |
| biological_process | GO:0009058 | biosynthetic process                           | 0.484012399   | 1                | 0.855877206 |
| biological_process | GO:0048869 | cellular developmental process                 | 0.48998348    | 1                | 0.855877206 |
| biological_process | GO:0034641 | cellular nitrogen compound metabolic process   | 0.491698637   | 1                | 0.855877206 |
| biological_process | GO:0032501 | multicellular organismal process               | 0.493778689   | 1                | 0.855877206 |
| biological_process | GO:0051186 | cofactor metabolic process                     | 0.500302061   | 1                | 0.855877206 |
| biological_process | GO:0051179 | localization                                   | 0.506067352   | 1                | 0.855877206 |
| biological_process | GO:0006810 | transport                                      | 0.510336719   | 1                | 0.855877206 |
| biological_process | GO:0051234 | establishment of localization                  | 0.510336719   | 1                | 0.855877206 |
| biological_process | GO:0008283 | cell proliferation                             | 0.540928159   | 1                | 0.897829212 |
| biological_process | GO:0005975 | carbohydrate metabolic process                 | 0.571096925   | 1                | 0.928753585 |
| biological_process | GO:0040011 | locomotion                                     | 0.571096925   | 1                | 0.928753585 |
| biological_process | GO:0006790 | sulfur compound metabolic process              | 0.597672708   | 1                | 0.952725801 |
| biological_process | GO:0051604 | protein maturation                             | 0.597672708   | 1                | 0.952725801 |
| biological_process | GO:0007049 | cell cycle                                     | 0.605884081   | 1                | 0.954201271 |
| biological_process | GO:0044085 | cellular component biogenesis                  | 0.616658575   | 1                | 0.954201271 |
| biological_process | GO:0000902 | cell morphogenesis                             | 0.622305176   | 1                | 0.954201271 |
| biological_process | GO:0032989 | cellular component morphogenesis               | 0.622305176   | 1                | 0.954201271 |
| biological_process | GO:0030705 | cytoskeleton-dependent intracellular transport | 0.650945344   | 1                | 0.979459817 |
| biological_process | GO:0043473 | pigmentation                                   | 0.650945344   | 1                | 0.979459817 |
| biological_process | GO:0006457 | protein folding                                | 0.685092082   | 1                | 0.989918624 |
| biological_process | GO:0044403 | symbiont process                               | 0.685092082   | 1                | 0.989918624 |
| biological_process | GO:0044419 | interspecies interaction between organisms     | 0.685092082   | 1                | 0.989918624 |
| biological_process | GO:0051704 | multi-organism process                         | 0.685092082   | 1                | 0.989918624 |
| biological_process | GO:0000278 | mitotic cell cycle                             | 0.688639043   | 1                | 0.989918624 |
| biological_process | GO:0006091 | generation of precursor metabolites and energy | 0.714111747   | 1                | 1           |
| biological_process | GO:0071840 | cellular component organization or biogenesis  | 0.726857231   | 1                | 1           |
| biological_process | GO:0007275 | multicellular organism development             | 0.738620981   | 1                | 1           |
| biological_process | GO:0009790 | embryo development                             | 0.738620981   | 1                | 1           |
| biological_process | GO:0040007 | growth                                         | 0.743213786   | 1                | 1           |
| biological_process | GO:0061024 | membrane organization                          | 0.743213786   | 1                | 1           |
| biological_process | GO:0007155 | cell adhesion                                  | 0.755080374   | 1                | 1           |
| biological_process | GO:0022610 | biological adhesion                            | 0.755080374   | 1                | 1           |
| biological_process | GO:0006996 | organelle organization                         | 0.78198211    | 1                | 1           |
| biological_process | GO:0007568 | aging                                          | 0.794976783   | 1                | 1           |
| biological_process | GO:0009653 | anatomical structure morphogenesis             | 0.798641316   | 1                | 1           |
| biological_process | GO:0022613 | ribonucleoprotein complex biogenesis           | 0.81826044    | 1                | 1           |
| biological_process | GO:0016192 | vesicle-mediated transport                     | 0.830541998   | 1                | 1           |
| biological_process | GO:0051301 | cell division                                  | 0.856452885   | 1                | 1           |
| biological_process | GO:0006399 | tRNA metabolic process                         | 0.856521786   | 1                | 1           |
| biological_process | GO:0034660 | ncRNA metabolic process                        | 0.856521786   | 1                | 1           |

| ontology           | node_id    | node_name                                                | raw_p_overrep | FWER_<br>overrep | qvalue |
|--------------------|------------|----------------------------------------------------------|---------------|------------------|--------|
| biological_process | GO:0000003 | reproduction                                             | 0.856817158   | 1                | 1      |
| biological_process | GO:0048646 | anatomical structure formation involved in morphogenesis | 0.875159595   | 1                | 1      |
| biological_process | GO:0006914 | autophagy                                                | 0.893953811   | 1                | 1      |
| biological_process | GO:0007005 | mitochondrion organization                               | 0.893953811   | 1                | 1      |
| biological_process | GO:0061919 | process utilizing autophagic mechanism                   | 0.893953811   | 1                | 1      |
| biological_process | GO:0006412 | translation                                              | 0.917917395   | 1                | 1      |
| biological_process | GO:0006518 | peptide metabolic process                                | 0.917917395   | 1                | 1      |
| biological_process | GO:0009059 | macromolecule biosynthetic process                       | 0.917917395   | 1                | 1      |
| biological_process | GO:0034645 | cellular macromolecule biosynthetic process              | 0.917917395   | 1                | 1      |
| biological_process | GO:0043043 | peptide biosynthetic process                             | 0.917917395   | 1                | 1      |
| biological_process | GO:0043603 | cellular amide metabolic process                         | 0.917917395   | 1                | 1      |
| biological_process | GO:0043604 | amide biosynthetic process                               | 0.917917395   | 1                | 1      |
| biological_process | GO:0044249 | cellular biosynthetic process                            | 0.917917395   | 1                | 1      |
| biological_process | GO:0044271 | cellular nitrogen compound biosynthetic process          | 0.917917395   | 1                | 1      |
| biological_process | GO:1901566 | organonitrogen compound biosynthetic process             | 0.917917395   | 1                | 1      |
| biological_process | GO:1901576 | organic substance biosynthetic process                   | 0.917917395   | 1                | 1      |
| biological_process | GO:0000280 | nuclear division                                         | 0.930109073   | 1                | 1      |
| biological_process | GO:0022402 | cell cycle process                                       | 0.930109073   | 1                | 1      |
| biological_process | GO:0048285 | organelle fission                                        | 0.930109073   | 1                | 1      |
| biological_process | GO:0140014 | mitotic nuclear division                                 | 0.930109073   | 1                | 1      |
| biological_process | GO:1903047 | mitotic cell cycle process                               | 0.930109073   | 1                | 1      |
| biological_process | GO:0051276 | chromosome organization                                  | 0.938812565   | 1                | 1      |
| biological_process | GO:0055085 | transmembrane transport                                  | 0.976561662   | 1                | 1      |
| biological_process | GO:0042254 | ribosome biogenesis                                      | 0.979812934   | 1                | 1      |
| biological_process | GO:0042592 | homeostatic process                                      | 0.990690553   | 1                | 1      |
| biological_process | GO:0065008 | regulation of biological quality                         | 0.990690553   | 1                | 1      |
| biological_process | GO:0008150 | biological_process                                       | 1             | 1                | 1      |
| biological_process | GO:0007009 | plasma membrane organization                             | 1             | 1                | 1      |
| biological_process | GO:0010256 | endomembrane system organization                         | 1             | 1                | 1      |
| biological_process | GO:0030198 | extracellular matrix organization                        | 1             | 1                | 1      |
| biological_process | GO:0043062 | extracellular structure organization                     | 1             | 1                | 1      |
| biological_process | GO:0007034 | vacuolar transport                                       | 1             | 1                | 1      |
| biological_process | GO:0007059 | chromosome segregation                                   | 1             | 1                | 1      |

Table SI 16

## Intensified selection enrichment

| ontology           | node_id    | node_name                                        | raw_p_overrep | FWER_overrep | qvalue |
|--------------------|------------|--------------------------------------------------|---------------|--------------|--------|
| biological_process | GO:0044281 | small molecule metabolic process                 | 0.011067621   | 0.254        | 1      |
| biological_process | GO:0006629 | lipid metabolic process                          | 0.027846065   | 0.514        | 1      |
| biological_process | GO:0019439 | aromatic compound catabolic process              | 0.09492738    | 0.904        | 1      |
| biological_process | GO:0034655 | nucleobase-containing compound catabolic process | 0.09492738    | 0.904        | 1      |
| biological_process | GO:0044270 | cellular nitrogen compound catabolic process     | 0.09492738    | 0.904        | 1      |
| biological_process | GO:0046700 | heterocycle catabolic process                    | 0.09492738    | 0.904        | 1      |
| biological_process | GO:1901361 | organic cyclic compound catabolic process        | 0.09492738    | 0.904        | 1      |
| biological_process | GO:1901575 | organic substance catabolic process              | 0.09492738    | 0.904        | 1      |
| biological_process | GO:0006091 | generation of precursor metabolites and energy   | 0.101687021   | 0.931        | 1      |
| biological_process | GO:0042592 | homeostatic process                              | 0.140164105   | 0.982        | 1      |
| biological_process | GO:0065008 | regulation of biological quality                 | 0.140164105   | 0.982        | 1      |
| biological_process | GO:0044248 | cellular catabolic process                       | 0.167118394   | 0.993        | 1      |
| biological_process | GO:0048856 | anatomical structure development                 | 0.187533085   | 0.995        | 1      |
| biological_process | GO:0005975 | carbohydrate metabolic process                   | 0.232907102   | 0.998        | 1      |
| biological_process | GO:0032502 | developmental process                            | 0.242998753   | 0.998        | 1      |
| biological_process | GO:0009058 | biosynthetic process                             | 0.259914194   | 0.998        | 1      |
| biological_process | GO:0051186 | cofactor metabolic process                       | 0.261725275   | 0.998        | 1      |
| biological_process | GO:0040007 | growth                                           | 0.331309947   | 1            | 1      |
| biological_process | GO:0007267 | cell-cell signaling                              | 0.3353463     | 1            | 1      |
| biological_process | GO:0009056 | catabolic process                                | 0.344198198   | 1            | 1      |
| biological_process | GO:0007034 | vacuolar transport                               | 0.344986113   | 1            | 1      |
| biological_process | GO:0042254 | ribosome biogenesis                              | 0.367968325   | 1            | 1      |
| biological_process | GO:0007568 | aging                                            | 0.379070546   | 1            | 1      |
| biological_process | GO:0051276 | chromosome organization                          | 0.379934885   | 1            | 1      |
| biological_process | GO:0006790 | sulfur compound metabolic process                | 0.471442619   | 1            | 1      |
| biological_process | GO:0006412 | translation                                      | 0.505179796   | 1            | 1      |
| biological_process | GO:0006518 | peptide metabolic process                        | 0.505179796   | 1            | 1      |
| biological_process | GO:0009059 | macromolecule biosynthetic process               | 0.505179796   | 1            | 1      |
| biological_process | GO:0034645 | cellular macromolecule biosynthetic process      | 0.505179796   | 1            | 1      |
| biological_process | GO:0043043 | peptide biosynthetic process                     | 0.505179796   | 1            | 1      |
| biological_process | GO:0043603 | cellular amide metabolic process                 | 0.505179796   | 1            | 1      |
| biological_process | GO:0043604 | amide biosynthetic process                       | 0.505179796   | 1            | 1      |
| biological_process | GO:0044249 | cellular biosynthetic process                    | 0.505179796   | 1            | 1      |
| biological_process | GO:0044271 | cellular nitrogen compound biosynthetic process  | 0.505179796   | 1            | 1      |
| biological_process | GO:1901566 | organonitrogen compound biosynthetic process     | 0.505179796   | 1            | 1      |
| biological_process | GO:1901576 | organic substance biosynthetic process           | 0.505179796   | 1            | 1      |
| biological_process | GO:0006082 | organic acid metabolic process                   | 0.532810481   | 1            | 1      |
| biological_process | GO:0006520 | cellular amino acid metabolic process            | 0.532810481   | 1            | 1      |
| biological_process | GO:0019752 | carboxylic acid metabolic process                | 0.532810481   | 1            | 1      |
| biological_process | GO:0043436 | oxoacid metabolic process                        | 0.532810481   | 1            | 1      |

| ontology           | node_id    | node_name                                                | raw_p_overrep | FWER_overrep | qvalue |
|--------------------|------------|----------------------------------------------------------|---------------|--------------|--------|
| biological_process | GO:0022613 | ribonucleoprotein complex biogenesis                     | 0.564343647   | 1            | 1      |
| biological_process | GO:0048646 | anatomical structure formation involved in morphogenesis | 0.580974516   | 1            | 1      |
| biological_process | GO:0008152 | metabolic process                                        | 0.595379374   | 1            | 1      |
| biological_process | GO:0040011 | locomotion                                               | 0.618315427   | 1            | 1      |
| biological_process | GO:0000003 | reproduction                                             | 0.672156468   | 1            | 1      |
| biological_process | GO:0055085 | transmembrane transport                                  | 0.676217767   | 1            | 1      |
| biological_process | GO:0034641 | cellular nitrogen compound metabolic process             | 0.678136068   | 1            | 1      |
| biological_process | GO:0002376 | immune system process                                    | 0.693576721   | 1            | 1      |
| biological_process | GO:0006914 | autophagy                                                | 0.693576721   | 1            | 1      |
| biological_process | GO:0007005 | mitochondrion organization                               | 0.693576721   | 1            | 1      |
| biological_process | GO:0061919 | process utilizing autophagic mechanism                   | 0.693576721   | 1            | 1      |
| biological_process | GO:0061024 | membrane organization                                    | 0.710043392   | 1            | 1      |
| biological_process | GO:0044085 | cellular component biogenesis                            | 0.737513994   | 1            | 1      |
| biological_process | GO:0044237 | cellular metabolic process                               | 0.743553821   | 1            | 1      |
| biological_process | GO:0006139 | nucleobase-containing compound metabolic process         | 0.784949908   | 1            | 1      |
| biological_process | GO:0006725 | cellular aromatic compound metabolic process             | 0.784949908   | 1            | 1      |
| biological_process | GO:0046483 | heterocycle metabolic process                            | 0.784949908   | 1            | 1      |
| biological_process | GO:1901360 | organic cyclic compound metabolic process                | 0.784949908   | 1            | 1      |
| biological_process | GO:0009653 | anatomical structure morphogenesis                       | 0.789069148   | 1            | 1      |
| biological_process | GO:0030154 | cell differentiation                                     | 0.792339264   | 1            | 1      |
| biological_process | GO:0007275 | multicellular organism development                       | 0.803764023   | 1            | 1      |
| biological_process | GO:0009790 | embryo development                                       | 0.803764023   | 1            | 1      |
| biological_process | GO:0016192 | vesicle-mediated transport                               | 0.806760907   | 1            | 1      |
| biological_process | GO:0048869 | cellular developmental process                           | 0.813402776   | 1            | 1      |
| biological_process | GO:0006810 | transport                                                | 0.839111243   | 1            | 1      |
| biological_process | GO:0051234 | establishment of localization                            | 0.839111243   | 1            | 1      |
| biological_process | GO:0006996 | organelle organization                                   | 0.856528298   | 1            | 1      |
| biological_process | GO:1901564 | organonitrogen compound metabolic process                | 0.863971013   | 1            | 1      |
| biological_process | GO:0006950 | response to stress                                       | 0.86799866    | 1            | 1      |
| biological_process | GO:0051179 | localization                                             | 0.870925271   | 1            | 1      |
| biological_process | GO:0044238 | primary metabolic process                                | 0.872496499   | 1            | 1      |
| biological_process | GO:0071704 | organic substance metabolic process                      | 0.872496499   | 1            | 1      |
| biological_process | GO:0044267 | cellular protein metabolic process                       | 0.873150409   | 1            | 1      |
| biological_process | GO:0006259 | DNA metabolic process                                    | 0.87543095    | 1            | 1      |
| biological_process | GO:0071840 | cellular component organization or biogenesis            | 0.875920169   | 1            | 1      |
| biological_process | GO:0043933 | protein-containing complex subunit organization          | 0.883303182   | 1            | 1      |
| biological_process | GO:0065003 | protein-containing complex assembly                      | 0.883303182   | 1            | 1      |
| biological_process | GO:0006807 | nitrogen compound metabolic process                      | 0.88591263    | 1            | 1      |
| biological_process | GO:0044260 | cellular macromolecule metabolic process                 | 0.89079428    | 1            | 1      |
| biological_process | GO:0032501 | multicellular organismal process                         | 0.895195592   | 1            | 1      |
| biological_process | GO:0019538 | protein metabolic process                                | 0.898939637   | 1            | 1      |
| biological_process | GO:0065007 | biological regulation                                    | 0.914633112   | 1            | 1      |
| biological_process | GO:0010467 | gene expression                                          | 0.9153289     | 1            | 1      |

| ontology           | node_id    | node_name                                      | raw_p_overrep | FWER_overrep | qvalue |
|--------------------|------------|------------------------------------------------|---------------|--------------|--------|
| biological_process | GO:0007154 | cell communication                             | 0.949016686   | 1            | 1      |
| biological_process | GO:0023052 | signaling                                      | 0.949016686   | 1            | 1      |
| biological_process | GO:0022607 | cellular component assembly                    | 0.952593999   | 1            | 1      |
| biological_process | GO:0006464 | cellular protein modification process          | 0.963660717   | 1            | 1      |
| biological_process | GO:0036211 | protein modification process                   | 0.963660717   | 1            | 1      |
| biological_process | GO:0043412 | macromolecule modification                     | 0.963660717   | 1            | 1      |
| biological_process | GO:0016043 | cellular component organization                | 0.978677687   | 1            | 1      |
| biological_process | GO:0043170 | macromolecule metabolic process                | 0.979157815   | 1            | 1      |
| biological_process | GO:0009987 | cellular process                               | 0.988392955   | 1            | 1      |
| biological_process | GO:0050896 | response to stimulus                           | 0.993527421   | 1            | 1      |
| biological_process | GO:0090304 | nucleic acid metabolic process                 | 0.99378897    | 1            | 1      |
| biological_process | GO:0008150 | biological_process                             | 1             | 1            | 1      |
| biological_process | GO:0003013 | circulatory system process                     | 1             | 1            | 1      |
| biological_process | GO:0007009 | plasma membrane organization                   | 1             | 1            | 1      |
| biological_process | GO:0010256 | endomembrane system organization               | 1             | 1            | 1      |
| biological_process | GO:0030198 | extracellular matrix organization              | 1             | 1            | 1      |
| biological_process | GO:0032196 | transposition                                  | 1             | 1            | 1      |
| biological_process | GO:0043062 | extracellular structure organization           | 1             | 1            | 1      |
| biological_process | GO:0034330 | cell junction organization                     | 1             | 1            | 1      |
| biological_process | GO:0030705 | cytoskeleton-dependent intracellular transport | 1             | 1            | 1      |
| biological_process | GO:0043473 | pigmentation                                   | 1             | 1            | 1      |
| biological_process | GO:0007155 | cell adhesion                                  | 1             | 1            | 1      |
| biological_process | GO:0022610 | biological adhesion                            | 1             | 1            | 1      |
| biological_process | GO:0006399 | tRNA metabolic process                         | 1             | 1            | 1      |
| biological_process | GO:0034660 | ncRNA metabolic process                        | 1             | 1            | 1      |
| biological_process | GO:0021700 | developmental maturation                       | 1             | 1            | 1      |
| biological_process | GO:0051604 | protein maturation                             | 1             | 1            | 1      |
| biological_process | GO:0003008 | system process                                 | 1             | 1            | 1      |
| biological_process | GO:0006928 | movement of cell or subcellular component      | 1             | 1            | 1      |
| biological_process | GO:0048870 | cell motility                                  | 1             | 1            | 1      |
| biological_process | GO:0050877 | nervous system process                         | 1             | 1            | 1      |
| biological_process | GO:0051674 | localization of cell                           | 1             | 1            | 1      |
| biological_process | GO:0006457 | protein folding                                | 1             | 1            | 1      |
| biological_process | GO:0006913 | nucleocytoplasmic transport                    | 1             | 1            | 1      |
| biological_process | GO:0044403 | symbiont process                               | 1             | 1            | 1      |
| biological_process | GO:0044419 | interspecies interaction between organisms     | 1             | 1            | 1      |
| biological_process | GO:0051169 | nuclear transport                              | 1             | 1            | 1      |
| biological_process | GO:0051704 | multi-organism process                         | 1             | 1            | 1      |
| biological_process | GO:0000280 | nuclear division                               | 1             | 1            | 1      |
| biological_process | GO:0022402 | cell cycle process                             | 1             | 1            | 1      |
| biological_process | GO:0048285 | organelle fission                              | 1             | 1            | 1      |
| biological_process | GO:0140014 | mitotic nuclear division                       | 1             | 1            | 1      |
| biological_process | GO:1903047 | mitotic cell cycle process                     | 1             | 1            | 1      |
| biological_process | GO:0007059 | chromosome segregation                         | 1             | 1            | 1      |
| biological_process | GO:0006605 | protein targeting                              | 1             | 1            | 1      |



| ontology           | node_id    | node_name                                      | raw_p_overrep | FWER_overrep | qvalue |
|--------------------|------------|------------------------------------------------|---------------|--------------|--------|
| biological_process | GO:0006886 | intracellular protein transport                | 1             | 1            | 1      |
| biological_process | GO:0008104 | protein localization                           | 1             | 1            | 1      |
| biological_process | GO:0015031 | protein transport                              | 1             | 1            | 1      |
| biological_process | GO:0015833 | peptide transport                              | 1             | 1            | 1      |
| biological_process | GO:0033036 | macromolecule localization                     | 1             | 1            | 1      |
| biological_process | GO:0034613 | cellular protein localization                  | 1             | 1            | 1      |
| biological_process | GO:0042886 | amide transport                                | 1             | 1            | 1      |
| biological_process | GO:0045184 | establishment of protein localization          | 1             | 1            | 1      |
| biological_process | GO:0070727 | cellular macromolecule localization            | 1             | 1            | 1      |
| biological_process | GO:0071702 | organic substance transport                    | 1             | 1            | 1      |
| biological_process | GO:0071705 | nitrogen compound transport                    | 1             | 1            | 1      |
| biological_process | GO:0000902 | cell morphogenesis                             | 1             | 1            | 1      |
| biological_process | GO:0022618 | ribonucleoprotein complex assembly             | 1             | 1            | 1      |
| biological_process | GO:0032989 | cellular component morphogenesis               | 1             | 1            | 1      |
| biological_process | GO:0034622 | cellular protein-containing complex assembly   | 1             | 1            | 1      |
| biological_process | GO:0071826 | ribonucleoprotein complex subunit organization | 1             | 1            | 1      |
| biological_process | GO:0051301 | cell division                                  | 1             | 1            | 1      |
| biological_process | GO:0008219 | cell death                                     | 1             | 1            | 1      |
| biological_process | GO:0007010 | cytoskeleton organization                      | 1             | 1            | 1      |
| biological_process | GO:0008283 | cell proliferation                             | 1             | 1            | 1      |
| biological_process | GO:0000278 | mitotic cell cycle                             | 1             | 1            | 1      |
| biological_process | GO:0046907 | intracellular transport                        | 1             | 1            | 1      |
| biological_process | GO:0051641 | cellular localization                          | 1             | 1            | 1      |
| biological_process | GO:0051649 | establishment of localization in cell          | 1             | 1            | 1      |
| biological_process | GO:0006396 | RNA processing                                 | 1             | 1            | 1      |
| biological_process | GO:0006397 | mRNA processing                                | 1             | 1            | 1      |
| biological_process | GO:0016071 | mRNA metabolic process                         | 1             | 1            | 1      |
| biological_process | GO:0016070 | RNA metabolic process                          | 1             | 1            | 1      |
| biological_process | GO:0007049 | cell cycle                                     | 1             | 1            | 1      |
| biological_process | GO:0007165 | signal transduction                            | 1             | 1            | 1      |
| biological_process | GO:0050789 | regulation of biological process               | 1             | 1            | 1      |
| biological_process | GO:0050794 | regulation of cellular process                 | 1             | 1            | 1      |
| biological_process | GO:0051716 | cellular response to stimulus                  | 1             | 1            | 1      |

**Table SI 17**Counting of nuclei in *Drosophila melanogaster*

| <b>Developmental stage</b>                    | <b>Estimated number of cells</b> |
|-----------------------------------------------|----------------------------------|
| Stage 13 embryo                               | ~ 107,912                        |
| Stage 16 embryo/begin 1st instar larval stage | ≥ 140,000                        |
| End 1st instar larval stage                   | ≥ 200,000                        |
| End 2nd instar larval stage                   | ≥ 370,000                        |
| End 3rd instar larval stage                   | ≥ 400,000                        |

Cell number estimates based on manual counting nuclei in 24 confocal planes of half a body.

Table SI 18

## Histidine pathway genes

| Species                          | <i>hutH</i> | <i>hutU</i> | <i>hutI</i> | <i>FTCD</i> |
|----------------------------------|-------------|-------------|-------------|-------------|
|                                  | OG0005325   | OG0004955   | OG0006789   | OG0005056   |
| <i>Demodex folliculorum</i>      | 0           | 0           | 0           | 0           |
| <i>Dermatophagoides farinae</i>  | 1           | 2           | 1           | 1           |
| <i>Ixodes scapularis</i>         | 1           | 1           | 2           | 2           |
| <i>Metaseiulus occidentalis</i>  | 1           | 1           | 1           | 1           |
| <i>Sarcoptes scabiei</i>         | 1           | 1           | 1           | 1           |
| <i>Tetranychus urticae</i>       | 1           | 0           | 0           | 0           |
| <i>Drosophila melanogaster</i>   | 0           | 0           | 0           | 0           |
| <i>Parasteatoda tepidariorum</i> | 1           | 1           | 1           | 1           |
| <i>Limulus polyphemus</i>        | 2           | 2           | 1           | 3           |
| <i>Stegodyphus mimosarum</i>     | 2           | 1           | 1           | 1           |
| <i>Daphnia pulex</i>             | 1           | 1           | 1           | 1           |
| <i>Tribolium castaneum</i>       | 1           | 0           | 0           | 0           |
| <i>Tropilaelaps mercedesae</i>   | 1           | 2           | 0           | 1           |
| <i>Centruroides sculpturatus</i> | 1           | 2           | 1           | 2           |
| <i>Varroa jacobsoni</i>          | 1           | 1           | 1           | 1           |

## References

- Arribas P, Andújar C, Moraza ML, Linard B, Emerson BC, Vogler AP. 2020. Mitochondrial metagenomics reveals the ancient origin and phylodiversity of soil mites and provides a phylogeny of the acari. *Mol Biol Evol.* 37:683–694.
- De Bie T, Cristianini N, Demuth JP, Hahn MW. 2006. CAFE: A computational tool for the study of gene family evolution. *Bioinformatics.* 22:1269–1271.
- Greenhalgh R, Dermauw W, Glas JJ, Rombauts S, Wybouw N, Thomas J, Alba JM, Pritham EJ, Legarra S, Feyereisen R, et al. 2020. Genome streamlining in a minute herbivore that manipulates its host plant. *eLife.* 9:e56689.
- Klimov PB, OConnor BM, Chetverikov PE, Bolton SJ, Pepato AR, Mortazavi AL, Tolstikov AV, Bauchan GR, Ochoa R. 2018. Comprehensive phylogeny of acariform mites (Acariformes) provides insights on the origin of the four-legged mites (Eriophyoidea), a long branch. *Mol Phylogenet Evol.* 119:105-117.
- Li F, Zhao X, Li M, He K, Huang C, Zhou Y, Li Z, Walters JR. 2019. Insect genomes: Progress and challenges. *Insect Mol Biol.* 28:739-758.
- McKenna DD, Scully ED, Pauchet Y, Hoover K, Kirsch R, Geib SM, Mitchell RF, Waterhouse RM, Ahn S-J, Arsala D, et al. 2016. Genome of the Asian longhorned beetle (*Anoplophora glabripennis*), a globally significant invasive species, reveals key functional and evolutionary innovations at the beetle–plant interface. *Genome Biol.* 17:e227.
- Sharma PP, Kaluziak ST, Pérez-Porro AR, González VL, Hormiga G, Wheeler WC, Giribet G. 2014. Phylogenomic interrogation of arachnida reveals systemic conflicts in phylogenetic signal. *Mol Biol Evol.* 31:2963–2984.
